# Supplementary material for: The role of transposon activity in shapingcis-regulatory element evolution after whole-genome duplication
Source: HighWire-hosted journal article supplement (doi:10.1101/gr.278931.124), 2025-02-12
Supplement: Supplemental_Table_S2.xlsx [file Supplemental_Table_S2.xlsx]

## Sheet: Sheet1
Table S2: Enrichment of regulatory active MPRA fragments
TE	regtype	TEsig	TEnosig	Othersig	Othernosig	p	or	ci.lower	ci.upper	padj	tag	sigEnriched
Ssa_0208	up	79	18240	9582	1425257	3.70902e-05	0.644	0.509333	0.804132	0.001	DTT	FALSE
Ssa_1448	up	14	2205	9647	1441292	1	0.949	0.517541	1.59579	1	XXX	FALSE
Ssa_0381	up	65	27788	9596	1415709	1.14622e-24	0.345	0.266032	0.440405	0	RIJ	FALSE
Ssa_0840	up	80	6610	9581	1436887	1.14668e-06	1.815	1.4361	2.2647	0	RIJ	TRUE
Ssa_0293	up	57	16127	9604	1427370	1.0156e-07	0.525	0.397364	0.681542	0	RIC	FALSE
Ssa_0099	up	6	2234	9655	1441263	0.0179943	0.401	0.146965	0.874354	0.188	DTA	FALSE
Ssa_0276	up	14	1401	9647	1442096	0.137554	1.494	0.814225	2.51606	0.625	DTT	FALSE
Ssa_1472	up	2	139	9659	1443358	0.241151	2.15	0.25779	7.9163	0.816	XXX	FALSE
Ssa_0070	up	20	9964	9641	1433533	3.65e-11	0.298	0.182135	0.461431	0	DTG	FALSE
Ssa_0016	up	1	797	9660	1442700	0.0745912	0.187	0.00474119	1.0473	0.444	DTX	FALSE
Ssa_0365	up	139	26721	9522	1416776	0.00212898	0.774	0.649611	0.915522	0.042	RIR	FALSE
Ssa_0972	up	33	8744	9628	1434753	0.000454033	0.562	0.38666	0.79097	0.012	XXX	FALSE
Ssa_0958	up	20	3665	9641	1439832	0.416592	0.815	0.496979	1.26127	1	RLG	FALSE
Ssa_0360	up	44	9964	9617	1433533	0.00441334	0.658	0.477636	0.885025	0.072	RIR	FALSE
Ssa_0361	up	68	13363	9593	1430134	0.0216778	0.759	0.58825	0.963303	0.201	RIR	FALSE
Ssa_0126	up	6	887	9655	1442610	0.837314	1.011	0.369846	2.20945	1	DTA	FALSE
Ssa_0522	up	23	1679	9638	1441818	0.00232369	2.049	1.29481	3.08725	0.044	RLX	TRUE
Ssa_0333	up	45	9328	9616	1434169	0.025445	0.719	0.524049	0.964297	0.227	RIJ	FALSE
Ssa_0363	up	103	24675	9558	1418822	2.26608e-07	0.62	0.505049	0.752705	0	RIR	FALSE
Ssa_1626	up	4	636	9657	1442861	1	0.94	0.255182	2.41855	1	XXX	FALSE
Ssa_0498	up	47	4418	9614	1439079	0.00296545	1.592	1.16744	2.12298	0.054	RST	TRUE
Ssa_0897	up	19	1273	9642	1442224	0.00157229	2.232	1.33899	3.50271	0.033	RLC	TRUE
Ssa_0789	up	256	42491	9405	1401006	0.0906653	0.897	0.789284	1.01662	0.495	DTT	FALSE
Ssa_0271	up	347	58473	9314	1385024	0.0226137	0.882	0.790256	0.982714	0.207	DTT	FALSE
Ssa_0029	up	2	792	9659	1442705	0.189283	0.377	0.045596	1.36738	0.727	DTX	FALSE
Ssa_0201	up	38	5468	9623	1438029	0.802802	1.039	0.733637	1.42835	1	DTT	FALSE
Ssa_0266	up	54	10168	9607	1433329	0.0985978	0.792	0.594368	1.03559	0.518	DTT	FALSE
Ssa_0202	up	73	8985	9588	1434512	0.104364	1.216	0.951094	1.53156	0.533	DTT	FALSE
Ssa_0858	up	71	10965	9590	1432532	0.859863	0.967	0.754203	1.2223	1	RIR	FALSE
Ssa_0144	up	19	1891	9642	1441606	0.0881717	1.502	0.902011	2.3539	0.491	DTA	FALSE
Ssa_0342	up	8	1638	9653	1441859	0.448772	0.73	0.314325	1.44143	1	RIN	FALSE
Ssa_0332	up	151	20974	9510	1422523	0.370235	1.077	0.91033	1.26554	1	RIJ	FALSE
Ssa_0658	up	5	496	9656	1443001	0.396525	1.506	0.48691	3.54018	1	DTX	FALSE
Ssa_0458	up	13	1620	9648	1441877	0.446912	1.199	0.636927	2.05764	1	RLG	FALSE
Ssa_0217	up	77	16525	9584	1426972	0.000902284	0.694	0.546723	0.868476	0.022	DTT	FALSE
Ssa_0017	up	2	275	9659	1443222	0.707829	1.087	0.13091	3.96356	1	DTX	FALSE
Ssa_1418	up	25	2113	9636	1441384	0.00731219	1.77	1.14208	2.62156	0.1	XXX	FALSE
Ssa_0371	up	59	15869	9602	1427628	8.57308e-07	0.553	0.420272	0.714091	0	RIJ	FALSE
Ssa_0243	up	12	3779	9649	1439718	0.00494956	0.474	0.244509	0.829005	0.076	DTT	FALSE
Ssa_0376	up	22	5009	9639	1438488	0.0452515	0.655	0.410192	0.994078	0.34	RIR	FALSE
Ssa_1373	up	26	5534	9635	1437963	0.0688771	0.701	0.457385	1.02914	0.428	XXX	FALSE
Ssa_1541	up	5	416	9656	1443081	0.211789	1.796	0.580041	4.22701	0.767	XXX	FALSE
Ssa_0204	up	148	27697	9513	1415800	0.00518933	0.795	0.671172	0.935935	0.079	DTT	FALSE
Ssa_1181	up	75	6292	9586	1437205	4.28758e-06	1.787	1.40254	2.24584	0	XXX	TRUE
Ssa_0368	up	13	2110	9648	1441387	0.893632	0.92	0.489103	1.57824	1	RIR	FALSE
Ssa_0430	up	8	1360	9653	1442137	0.867813	0.879	0.378552	1.7372	1	RLG	FALSE
Ssa_0750	up	25	8955	9636	1434542	6.16241e-07	0.416	0.268689	0.614323	0	DTT	FALSE
Ssa_0358	up	59	12926	9602	1430571	0.00233148	0.68	0.516971	0.878569	0.044	RIR	FALSE
Ssa_0362	up	38	13180	9623	1430317	2.65561e-09	0.429	0.302925	0.588978	0	RIR	FALSE
Ssa_0394	up	4	1645	9657	1441852	0.0319742	0.363	0.0987628	0.931636	0.272	RIL	FALSE
Ssa_0451	up	216	22410	9445	1421087	3.64895e-07	1.45	1.2605	1.66081	0	RLG	TRUE
Ssa_0759	up	12	4926	9649	1438571	4.82943e-05	0.363	0.187495	0.635296	0.002	DTT	FALSE
Ssa_1379	up	6	2290	9655	1441207	0.0136806	0.391	0.143361	0.852903	0.159	XXX	FALSE
Ssa_0180	up	16	3083	9645	1440414	0.374761	0.775	0.442259	1.26132	1	DTA	FALSE
Ssa_0863	up	39	7361	9622	1436136	0.151507	0.791	0.561481	1.0829	0.652	RIR	FALSE
Ssa_0684	up	1	802	9660	1442695	0.075258	0.186	0.00471168	1.04075	0.444	DTX	FALSE
Ssa_0374	up	67	9343	9594	1434154	0.566382	1.072	0.829358	1.36398	1	RIR	FALSE
Ssa_0100	up	6	2563	9655	1440934	0.0033745	0.349	0.128093	0.761748	0.06	DTA	FALSE
Ssa_1227	up	2	181	9659	1443316	0.343641	1.651	0.198405	6.05264	0.969	XXX	FALSE
Ssa_0364	up	29	4189	9632	1439308	0.849088	1.035	0.691588	1.48893	1	RIR	FALSE
Ssa_1137	up	6	2478	9655	1441019	0.00602451	0.361	0.13245	0.787988	0.085	XXX	FALSE
Ssa_0050	up	19	5874	9642	1437623	0.000517669	0.482	0.290026	0.754246	0.013	DTX	FALSE
Ssa_0804	up	30	8441	9631	1435056	0.00016334	0.53	0.35686	0.757065	0.005	RIC	FALSE
Ssa_0292	up	14	1248	9647	1442249	0.0785787	1.677	0.913844	2.82598	0.455	RIC	FALSE
Ssa_0867	up	96	19399	9565	1424098	0.00217936	0.737	0.595933	0.901234	0.043	RIR	FALSE
Ssa_0346	up	2	207	9659	1443290	0.404993	1.444	0.173632	5.28308	1	RIN	FALSE
Ssa_1821	up	0	213	9661	1443284	0.411409	0	0	2.61031	1	XXX	FALSE
Ssa_1419	up	15	1925	9646	1441572	0.485631	1.165	0.650244	1.92653	1	XXX	FALSE
Ssa_0038	up	8	928	9653	1442569	0.41828	1.288	0.554387	2.55012	1	DTX	FALSE
Ssa_0190	up	14	3906	9647	1439591	0.0136131	0.535	0.292038	0.898944	0.159	DTT	FALSE
Ssa_0805	up	30	11508	9631	1431989	1.67924e-09	0.388	0.261245	0.554007	0	RIC	FALSE
Ssa_1348	up	0	151	9661	1443346	0.630881	0	0	3.69542	1	XXX	FALSE
Ssa_1425	up	0	216	9661	1443281	0.411508	0	0	2.57375	1	XXX	FALSE
Ssa_0629	up	9	1191	9652	1442306	0.719526	1.129	0.514914	2.15168	1	DTX	FALSE
Ssa_0334	up	11	2055	9650	1441442	0.586241	0.8	0.39839	1.4343	1	RIJ	FALSE
Ssa_0220	up	15	2332	9646	1441165	1	0.961	0.536799	1.58916	1	DTT	FALSE
Ssa_1495	up	2	257	9659	1443240	0.691961	1.163	0.140053	4.24446	1	XXX	FALSE
Ssa_0120	up	3	318	9658	1443179	0.477174	1.41	0.289103	4.15847	1	DTA	FALSE
Ssa_0808	up	4	550	9657	1442947	0.790112	1.087	0.294972	2.79931	1	RIC	FALSE
Ssa_1315	up	1	52	9660	1443445	0.297803	2.873	0.0713892	16.7278	0.908	XXX	FALSE
Ssa_1187	up	10	750	9651	1442747	0.0395211	1.993	0.951618	3.68766	0.312	XXX	FALSE
Ssa_0298	up	47	8006	9614	1435491	0.409082	0.877	0.643081	1.16768	1	RIC	FALSE
Ssa_1397	up	25	980	9636	1442517	3.79031e-08	3.819	2.45787	5.67455	0	XXX	TRUE
Ssa_0439	up	10	1956	9651	1441541	0.486607	0.764	0.365493	1.40804	1	RLG	FALSE
Ssa_0747	up	72	7810	9589	1435687	0.00988272	1.38	1.07788	1.74201	0.128	DTT	FALSE
Ssa_1451	up	1	521	9660	1442976	0.275911	0.287	0.00724741	1.60486	0.873	XXX	FALSE
Ssa_1382	up	16	1164	9645	1442333	0.0101021	2.056	1.17053	3.35381	0.129	XXX	FALSE
Ssa_0560	up	5	551	9656	1442946	0.427542	1.356	0.438459	3.18483	1	RLX	FALSE
Ssa_0532	up	7	532	9654	1442965	0.0986482	1.967	0.786673	4.08207	0.518	RLX	FALSE
Ssa_0495	up	27	3984	9634	1439513	0.922313	1.013	0.666127	1.47656	1	RST	FALSE
Ssa_0756	up	6	7813	9655	1435684	1.40362e-15	0.114	0.041886	0.248754	0	DTT	FALSE
Ssa_1162	up	2	449	9659	1443048	0.775175	0.665	0.0803322	2.41866	1	XXX	FALSE
Ssa_0380	up	27	2540	9634	1440957	0.0205399	1.59	1.04514	2.32022	0.197	RIR	FALSE
Ssa_0452	up	89	8801	9572	1434696	0.00023366	1.516	1.2148	1.86939	0.007	RLG	TRUE
Ssa_0784	up	42	18651	9619	1424846	1.22878e-17	0.334	0.24014	0.451417	0	DTT	FALSE
Ssa_0643	up	4	308	9657	1443189	0.155922	1.941	0.525374	5.02203	0.662	DTX	FALSE
Ssa_0247	up	0	1690	9661	1441807	2.91805e-05	0	0	0.326148	0.001	DTT	FALSE
Ssa_0803	up	93	16193	9568	1427304	0.14565	0.857	0.690389	1.0514	0.638	RIC	FALSE
Ssa_0802	up	31	9973	9630	1433524	1.74144e-06	0.463	0.314014	0.657659	0	RIC	FALSE
Ssa_0681	up	16	1423	9645	1442074	0.0486148	1.681	0.957875	2.74107	0.353	DTX	FALSE
Ssa_0249	up	1	146	9660	1443351	0.624918	1.023	0.0257333	5.79347	1	DTT	FALSE
Ssa_1286	up	2	168	9659	1443329	0.312175	1.779	0.213641	6.52852	0.923	XXX	FALSE
Ssa_0375	up	0	635	9661	1442862	0.0256605	0	0	0.8703	0.227	RIR	FALSE
Ssa_0389	up	6	512	9655	1442985	0.165902	1.751	0.639583	3.8401	0.682	RIL	FALSE
Ssa_0547	up	3	528	9658	1442969	1	0.849	0.174464	2.49508	1	RLX	FALSE
Ssa_0324	up	0	112	9661	1443385	1	0	0	5.00408	1	RIL	FALSE
Ssa_0269	up	2	813	9659	1442684	0.190833	0.367	0.0444194	1.33189	0.727	DTT	FALSE
Ssa_0571	up	40	1745	9621	1441752	8.75643e-11	3.435	2.44375	4.70017	0	RLX	TRUE
Ssa_0454	up	16	2638	9645	1440859	0.810808	0.906	0.51692	1.47496	1	RLG	FALSE
Ssa_0758	up	49	8899	9612	1434598	0.191342	0.822	0.60708	1.08831	0.727	DTT	FALSE
Ssa_1107	up	10	1460	9651	1442037	0.871896	1.023	0.489568	1.88831	1	XXX	FALSE
Ssa_0411	up	73	4314	9588	1439183	5.15104e-12	2.54	1.98534	3.20369	0	RLC	TRUE
Ssa_0944	up	9	1026	9652	1442471	0.438107	1.311	0.597551	2.49928	1	RLG	FALSE
Ssa_0657	up	10	487	9651	1443010	0.00212086	3.07	1.46252	5.69742	0.042	DTX	TRUE
Ssa_0028	up	8	1026	9653	1442471	0.566245	1.165	0.501544	2.30545	1	DTX	FALSE
Ssa_1531	up	0	35	9661	1443462	1	0	0	16.609	1	XXX	FALSE
Ssa_1422	up	4	399	9657	1443098	0.349071	1.498	0.406095	3.8673	0.975	XXX	FALSE
Ssa_1965	up	0	394	9661	1443103	0.122045	0	0	1.40543	0.583	XXX	FALSE
Ssa_0085	up	0	203	9661	1443294	0.649215	0	0	2.74008	1	DTA	FALSE
Ssa_1143	up	7	809	9654	1442688	0.511214	1.293	0.518074	2.67743	1	XXX	FALSE
Ssa_0754	up	28	7332	9633	1436165	0.00150971	0.569	0.377855	0.824102	0.032	DTT	FALSE
Ssa_0527	up	21	1736	9640	1441761	0.0114229	1.809	1.11651	2.77599	0.141	RLX	FALSE
Ssa_0447	up	11	2131	9650	1441366	0.503824	0.771	0.384162	1.38297	1	RLG	FALSE
Ssa_0598	up	8	1222	9653	1442275	1	0.978	0.42122	1.93435	1	RLX	FALSE
Ssa_0627	up	7	279	9654	1443218	0.00332356	3.751	1.49374	7.83488	0.06	RLX	TRUE
Ssa_0450	up	33	5839	9628	1437658	0.375692	0.844	0.580001	1.18734	1	RLG	FALSE
Ssa_0743	up	7	1258	9654	1442239	0.861339	0.831	0.33344	1.71853	1	DTT	FALSE
Ssa_0757	up	21	14510	9640	1428987	1.87138e-20	0.215	0.132702	0.328258	0	DTT	FALSE
Ssa_1988	up	5	348	9656	1443149	0.0886292	2.147	0.692728	5.06077	0.492	XXX	FALSE
Ssa_0041	up	11	604	9650	1442893	0.00321652	2.723	1.35163	4.90944	0.058	DTX	TRUE
Ssa_0409	up	1	217	9660	1443280	1	0.689	0.0173509	3.8774	1	RLB	FALSE
Ssa_1203	up	5	567	9656	1442930	0.43887	1.318	0.426127	3.0944	1	XXX	FALSE
Ssa_1214	up	0	96	9661	1443401	1	0	0	5.85357	1	XXX	FALSE
Ssa_0591	up	13	910	9648	1442587	0.0123127	2.136	1.13251	3.67293	0.15	RLX	FALSE
Ssa_0224	up	1	387	9660	1443110	0.529526	0.386	0.00975013	2.16416	1	DTT	FALSE
Ssa_0617	up	27	1877	9634	1441620	0.000326333	2.153	1.41387	3.144	0.009	RLX	TRUE
Ssa_0294	up	89	11434	9572	1432063	0.150242	1.165	0.933543	1.43584	0.649	RIC	FALSE
Ssa_0515	up	12	860	9649	1442637	0.0185156	2.086	1.07335	3.66486	0.189	RLX	FALSE
Ssa_0740	up	23	1804	9638	1441693	0.0053755	1.907	1.20522	2.87244	0.081	DTT	TRUE
Ssa_0170	up	5	562	9656	1442935	0.435236	1.329	0.429906	3.1221	1	DTA	FALSE
Ssa_0584	up	30	1248	9631	1442249	6.50968e-09	3.6	2.41703	5.16863	0	RLX	TRUE
Ssa_0297	up	14	2465	9647	1441032	0.62142	0.848	0.462951	1.42693	1	RIC	FALSE
Ssa_0481	up	3	1314	9658	1442183	0.0583457	0.341	0.0701985	0.998816	0.382	RST	FALSE
Ssa_0482	up	5	1162	9656	1442335	0.466684	0.643	0.208233	1.50477	1	RST	FALSE
Ssa_0845	up	19	3719	9642	1439778	0.267689	0.763	0.458571	1.1937	0.866	RIN	FALSE
Ssa_0135	up	12	1511	9649	1441986	0.525271	1.187	0.611659	2.08027	1	DTA	FALSE
Ssa_0937	up	4	608	9657	1442889	1	0.983	0.266912	2.53078	1	RLG	FALSE
Ssa_0553	up	5	323	9656	1443174	0.0697505	2.314	0.746004	5.45669	0.43	RLX	FALSE
Ssa_1446	up	18	2592	9643	1440905	0.809347	1.038	0.613738	1.64417	1	XXX	FALSE
Ssa_0076	up	3	698	9658	1442799	0.639488	0.642	0.132067	1.88466	1	DTA	FALSE
Ssa_0445	up	20	2786	9641	1440711	0.72632	1.073	0.653951	1.66097	1	RLG	FALSE
Ssa_1246	up	10	1013	9651	1442484	0.241075	1.475	0.705148	2.72586	0.816	XXX	FALSE
Ssa_0163	up	3	523	9658	1442974	1	0.857	0.176129	2.51906	1	DTA	FALSE
Ssa_0623	up	30	1121	9631	1442376	6.09336e-10	4.008	2.68984	5.75705	0	RLX	TRUE
Ssa_0489	up	13	412	9648	1443085	7.71555e-06	4.719	2.49074	8.16405	0	RST	TRUE
Ssa_0886	up	8	1266	9653	1442231	1	0.944	0.406604	1.86674	1	RIL	FALSE
Ssa_0536	up	7	566	9654	1442931	0.112915	1.849	0.739622	3.83541	0.564	RLX	FALSE
Ssa_1375	up	22	4190	9639	1439307	0.295514	0.784	0.490546	1.18933	0.907	XXX	FALSE
Ssa_1395	up	14	1695	9647	1441802	0.372988	1.234	0.673169	2.07789	1	XXX	FALSE
Ssa_0429	up	23	2960	9638	1440537	0.430097	1.161	0.734705	1.74709	1	RLE	FALSE
Ssa_0383	up	4	334	9657	1443163	0.294355	1.79	0.484687	4.62731	0.907	RIT	FALSE
Ssa_0062	up	1	1563	9660	1441934	0.00080853	0.096	0.00241985	0.533007	0.02	DTC	FALSE
Ssa_0393	up	0	225	9661	1443272	0.412595	0	0	2.46994	1	RIL	FALSE
Ssa_0961	up	1	802	9660	1442695	0.075258	0.186	0.00471168	1.04075	0.444	RLG	FALSE
Ssa_1790	up	46	2955	9615	1440542	4.08943e-07	2.332	1.70256	3.12175	0	XXX	TRUE
Ssa_0413	up	10	764	9651	1442733	0.0425826	1.957	0.934213	3.62012	0.329	RLC	FALSE
Ssa_0296	up	36	4790	9625	1438707	0.476893	1.123	0.785361	1.55864	1	RIC	FALSE
Ssa_1386	up	8	1685	9653	1441812	0.451267	0.709	0.305575	1.40109	1	XXX	FALSE
Ssa_1182	up	2	672	9659	1442825	0.340552	0.445	0.0537266	1.61271	0.966	XXX	FALSE
Ssa_0572	up	10	638	9651	1442859	0.0127439	2.343	1.11791	4.33914	0.154	RLX	FALSE
Ssa_0464	up	0	387	9661	1443110	0.193715	0	0	1.43097	0.727	RLG	FALSE
Ssa_1274	up	30	1413	9631	1442084	9.05261e-08	3.179	2.13569	4.56205	0	XXX	TRUE
Ssa_0955	up	0	183	9661	1443314	0.638643	0	0	3.04242	1	RLG	FALSE
Ssa_1381	up	11	2354	9650	1441143	0.308281	0.698	0.347761	1.25153	0.921	XXX	FALSE
Ssa_0556	up	3	369	9658	1443128	0.741492	1.215	0.249333	3.57908	1	RLX	FALSE
Ssa_0551	up	11	533	9650	1442964	0.00125517	3.086	1.53065	5.56929	0.028	RLX	TRUE
Ssa_0094	up	23	2037	9638	1441460	0.0196164	1.689	1.06753	2.54254	0.197	DTA	FALSE
Ssa_0191	up	1	278	9660	1443219	1	0.537	0.0135592	3.01976	1	DTT	FALSE
Ssa_1496	up	1	173	9660	1443324	1	0.864	0.0217395	4.87717	1	XXX	FALSE
Ssa_1151	up	9	1222	9652	1442275	0.72368	1.101	0.501879	2.09694	1	XXX	FALSE
Ssa_1852	up	52	6182	9609	1437315	0.100688	1.258	0.9379	1.65352	0.524	XXX	FALSE
Ssa_1457	up	0	176	9661	1443321	0.635853	0	0	3.16509	1	XXX	FALSE
Ssa_1402	up	3	351	9658	1443146	0.512681	1.277	0.262065	3.76425	1	XXX	FALSE
Ssa_1801	up	5	213	9656	1443284	0.0159166	3.509	1.12744	8.31878	0.176	XXX	FALSE
Ssa_0209	up	53	21006	9608	1422491	3.30258e-17	0.374	0.279516	0.489249	0	DTT	FALSE
Ssa_1465	up	21	2873	9640	1440624	0.646242	1.092	0.674803	1.67394	1	XXX	FALSE
Ssa_1335	up	4	1798	9657	1441699	0.013302	0.332	0.0903999	0.852134	0.157	XXX	FALSE
Ssa_0259	up	4	625	9657	1442872	1	0.956	0.259666	2.46131	1	DTB	FALSE
Ssa_1409	up	9	569	9652	1442928	0.0166698	2.364	1.07536	4.52235	0.181	XXX	FALSE
Ssa_0178	up	1	282	9660	1443215	1	0.53	0.0133676	2.97678	1	DTA	FALSE
Ssa_0663	up	5	1057	9656	1442440	0.570462	0.707	0.228915	1.65485	1	DTX	FALSE
Ssa_0081	up	6	577	9655	1442920	0.295478	1.554	0.567809	3.40469	0.907	DTA	FALSE
Ssa_0942	up	13	1293	9648	1442204	0.167505	1.503	0.797765	2.58048	0.685	RLG	FALSE
Ssa_0722	up	3	955	9658	1442542	0.231153	0.469	0.096571	1.37577	0.797	DTA	FALSE
Ssa_0941	up	9	1140	9652	1442357	0.582567	1.18	0.537909	2.24857	1	RLG	FALSE
Ssa_0337	up	11	1236	9650	1442261	0.296637	1.33	0.662023	2.38945	0.908	RIJ	FALSE
Ssa_0676	up	5	941	9656	1442556	0.839908	0.794	0.257106	1.85968	1	DTX	FALSE
Ssa_0664	up	12	1313	9649	1442184	0.30493	1.366	0.70377	2.39526	0.915	DTX	FALSE
Ssa_1376	up	18	2084	9643	1441413	0.279768	1.291	0.763299	2.04669	0.88	XXX	FALSE
Ssa_0072	up	2	615	9659	1442882	0.452995	0.486	0.058697	1.76279	1	DTH	FALSE
Ssa_0711	up	1	236	9660	1443261	1	0.633	0.0159596	3.5628	1	DTA	FALSE
Ssa_1850	up	9	459	9652	1443038	0.0046287	2.931	1.33154	5.61636	0.073	XXX	TRUE
Ssa_1413	up	3	201	9658	1443296	0.15551	2.23	0.456052	6.61469	0.662	XXX	FALSE
Ssa_0010	up	1	175	9660	1443322	1	0.854	0.0214924	4.8207	1	DYC	FALSE
Ssa_0459	up	18	2779	9643	1440718	1	0.968	0.5724	1.5331	1	RLG	FALSE
Ssa_0139	up	21	1844	9640	1441653	0.021239	1.703	1.05122	2.61272	0.199	DTA	FALSE
Ssa_0659	up	2	513	9659	1442984	0.781381	0.582	0.0703336	2.11532	1	DTX	FALSE
Ssa_0188	up	1	259	9660	1443238	1	0.577	0.0145501	3.24326	1	DTI	FALSE
Ssa_0359	up	27	8612	9634	1434885	1.0585e-05	0.467	0.307351	0.680323	0	RIR	FALSE
Ssa_0613	up	94	2440	9567	1441057	2.38151e-39	5.803	4.66643	7.14091	0	RLX	TRUE
Ssa_0479	up	3	1424	9658	1442073	0.0318708	0.315	0.0647887	0.921437	0.272	RLG	FALSE
Ssa_0824	up	0	135	9661	1443362	1	0	0	4.13944	1	RIL	FALSE
Ssa_1399	up	35	4143	9626	1439354	0.180394	1.263	0.878129	1.76089	0.711	XXX	FALSE
Ssa_0938	up	11	1333	9650	1442164	0.497591	1.233	0.61392	2.21488	1	RLG	FALSE
Ssa_0468	up	4	404	9657	1443093	0.35419	1.48	0.401084	3.81891	0.984	RLG	FALSE
Ssa_0225	up	3	625	9658	1442872	0.804702	0.717	0.147479	2.10589	1	DTT	FALSE
Ssa_0519	up	7	294	9654	1443203	0.00438334	3.559	1.41819	7.42916	0.072	RLX	TRUE
Ssa_1461	up	1	852	9660	1442645	0.0526154	0.175	0.00443558	0.979472	0.367	XXX	FALSE
Ssa_0042	up	24	5433	9637	1438064	0.0368727	0.659	0.421777	0.982463	0.302	DTX	FALSE
Ssa_0444	up	10	2062	9651	1441435	0.414177	0.724	0.346688	1.33536	1	RLG	FALSE
Ssa_0267	up	35	4706	9626	1438791	0.529907	1.112	0.772858	1.54938	1	DTT	FALSE
Ssa_0272	up	9	1857	9652	1441640	0.393263	0.724	0.330354	1.37769	1	DTT	FALSE
Ssa_0053	up	0	184	9661	1443313	0.639084	0	0	3.02574	1	DTX	FALSE
Ssa_0912	up	26	6242	9635	1437255	0.0124246	0.621	0.405371	0.91187	0.151	RLE	FALSE
Ssa_0833	up	0	62	9661	1443435	1	0	0	9.1617	1	RIL	FALSE
Ssa_0701	up	3	353	9658	1443144	0.514939	1.27	0.260587	3.74273	1	DTX	FALSE
Ssa_0257	up	5	530	9656	1442967	0.41412	1.41	0.455764	3.31189	1	DTT	FALSE
Ssa_0435	up	4	822	9657	1442675	0.670339	0.727	0.197566	1.86901	1	RLG	FALSE
Ssa_0093	up	18	2301	9643	1441196	0.520256	1.169	0.691357	1.85295	1	DTA	FALSE
Ssa_0585	up	10	494	9651	1443003	0.00234401	3.027	1.44187	5.616	0.044	RLX	TRUE
Ssa_1575	up	0	361	9661	1443136	0.185141	0	0	1.53454	0.721	XXX	FALSE
Ssa_1185	up	10	1401	9651	1442096	0.743067	1.067	0.510162	1.96816	1	XXX	FALSE
Ssa_1283	up	3	358	9658	1443139	0.520624	1.252	0.256963	3.6896	1	XXX	FALSE
Ssa_1288	up	0	60	9661	1443437	1	0	0	9.47654	1	XXX	FALSE
Ssa_0216	up	24	4201	9637	1439296	0.506503	0.853	0.545782	1.27211	1	DTT	FALSE
Ssa_1186	up	12	1116	9649	1442381	0.0983872	1.607	0.827731	2.82032	0.518	XXX	FALSE
Ssa_1290	up	0	59	9661	1443438	1	0	0	9.64225	1	XXX	FALSE
Ssa_0469	up	1	332	9660	1443165	0.731389	0.45	0.0113604	2.52501	1	RLG	FALSE
Ssa_0446	up	8	1085	9653	1442412	0.708059	1.102	0.474308	2.17965	1	RLG	FALSE
Ssa_1232	up	4	150	9657	1443347	0.0200552	3.986	1.07182	10.4222	0.197	XXX	FALSE
Ssa_0125	up	10	1195	9651	1442302	0.473486	1.251	0.59796	2.30906	1	DTA	FALSE
Ssa_0786	up	0	73	9661	1443424	1	0	0	7.74681	1	DTT	FALSE
Ssa_1823	up	3	194	9658	1443303	0.144584	2.311	0.472372	6.85693	0.638	XXX	FALSE
Ssa_1784	up	0	103	9661	1443394	1	0	0	5.44798	1	XXX	FALSE
Ssa_1362	up	4	120	9657	1443377	0.00974706	4.983	1.33544	13.0927	0.127	XXX	FALSE
Ssa_0600	up	6	344	9655	1443153	0.0309336	2.607	0.9499	5.7351	0.266	RLX	FALSE
Ssa_0261	up	10	1365	9651	1442132	0.737959	1.095	0.523588	2.02031	1	DTB	FALSE
Ssa_1836	up	5	286	9656	1443211	0.0463513	2.613	0.84181	6.17127	0.343	XXX	FALSE
Ssa_0745	up	16	4463	9645	1439034	0.00950533	0.535	0.305329	0.870048	0.125	DTT	FALSE
Ssa_0051	up	11	1220	9650	1442277	0.290834	1.348	0.67069	2.4208	0.899	DTX	FALSE
Ssa_0545	up	1	172	9660	1443325	1	0.869	0.0218652	4.90591	1	RLX	FALSE
Ssa_0768	up	2	967	9659	1442530	0.107332	0.309	0.0373501	1.11916	0.541	DTB	FALSE
Ssa_1175	up	5	771	9656	1442726	1	0.969	0.313627	2.2719	1	XXX	FALSE
Ssa_1849	up	4	449	9657	1443048	0.551763	1.331	0.36107	3.4332	1	XXX	FALSE
Ssa_0967	up	0	137	9661	1443360	1	0	0	4.07819	1	XXX	FALSE
Ssa_0888	up	11	1120	9650	1442377	0.196375	1.468	0.73045	2.63818	0.732	RIL	FALSE
Ssa_0218	up	5	1920	9656	1441577	0.0236866	0.389	0.126065	0.909195	0.215	DTT	FALSE
Ssa_1452	up	7	625	9654	1442872	0.209156	1.674	0.670051	3.47067	0.763	XXX	FALSE
Ssa_0717	up	0	48	9661	1443449	1	0	0	11.9408	1	DTA	FALSE
Ssa_1511	up	1	152	9660	1443345	1	0.983	0.024724	5.56174	1	XXX	FALSE
Ssa_0919	up	13	2204	9648	1441293	0.792974	0.881	0.468243	1.51065	1	RLG	FALSE
Ssa_0404	up	3	961	9658	1442536	0.231522	0.466	0.0959686	1.36714	0.797	RLB	FALSE
Ssa_0544	up	5	569	9656	1442928	0.440346	1.313	0.424635	3.08345	1	RLX	FALSE
Ssa_0497	up	18	1467	9643	1442030	0.0154047	1.835	1.08394	2.91172	0.174	RST	FALSE
Ssa_0391	up	14	3256	9647	1440241	0.105088	0.642	0.350417	1.07915	0.533	RIL	FALSE
Ssa_1180	up	2	622	9659	1442875	0.454105	0.48	0.0580377	1.74281	1	XXX	FALSE
Ssa_1766	up	3	377	9658	1443120	0.744258	1.189	0.244062	3.50257	1	XXX	FALSE
Ssa_1406	up	7	1317	9654	1442180	0.733182	0.794	0.318527	1.64128	1	XXX	FALSE
Ssa_1832	up	3	129	9658	1443368	0.0586061	3.475	0.707344	10.3901	0.382	XXX	FALSE
Ssa_0168	up	37	5454	9624	1438043	0.933557	1.014	0.712473	1.40004	1	DTA	FALSE
Ssa_0307	up	5	706	9656	1442791	0.815343	1.058	0.342459	2.48192	1	RIL	FALSE
Ssa_1301	up	11	758	9650	1442739	0.0214099	2.17	1.07807	3.90619	0.199	XXX	FALSE
Ssa_0236	up	3	1025	9658	1442472	0.176423	0.437	0.0899814	1.28147	0.703	DTT	FALSE
Ssa_0457	up	4	856	9657	1442641	0.671992	0.698	0.189734	1.79447	1	RLG	FALSE
Ssa_0668	up	9	685	9652	1442812	0.0549112	1.964	0.893963	3.75191	0.371	DTX	FALSE
Ssa_0108	up	0	171	9661	1443326	0.634198	0	0	3.25849	1	DTA	FALSE
Ssa_1587	up	0	214	9661	1443283	0.411427	0	0	2.59801	1	XXX	FALSE
Ssa_1387	up	10	799	9651	1442698	0.0761353	1.871	0.893426	3.46007	0.446	XXX	FALSE
Ssa_0776	up	4	1225	9657	1442272	0.16106	0.488	0.132636	1.25222	0.672	DTB	FALSE
Ssa_0687	up	2	202	9659	1443295	0.393394	1.479	0.177904	5.41542	1	DTX	FALSE
Ssa_1292	up	0	249	9661	1443248	0.420679	0	0	2.23007	1	XXX	FALSE
Ssa_0534	up	14	769	9647	1442728	0.000968229	2.723	1.48087	4.59802	0.023	RLX	TRUE
Ssa_1523	up	0	298	9661	1443199	0.275838	0	0	1.86105	0.873	XXX	FALSE
Ssa_0946	up	2	371	9659	1443126	1	0.805	0.0971652	2.93085	1	RLG	FALSE
Ssa_1972	up	3	835	9658	1442662	0.391476	0.537	0.11042	1.57429	1	XXX	FALSE
Ssa_0402	up	1	766	9660	1442731	0.0717796	0.195	0.00493277	1.08986	0.437	RLB	FALSE
Ssa_0052	up	3	1024	9658	1442473	0.176366	0.438	0.0900692	1.28272	0.703	DTX	FALSE
Ssa_0552	up	0	518	9661	1442979	0.055738	0	0	1.06766	0.371	RLX	FALSE
Ssa_1165	up	7	1012	9654	1442485	0.846159	1.034	0.414354	2.13813	1	XXX	FALSE
Ssa_1296	up	3	954	9658	1442543	0.231102	0.47	0.0966721	1.37722	0.797	XXX	FALSE
Ssa_1981	up	4	555	9657	1442942	0.791441	1.077	0.292328	2.77349	1	XXX	FALSE
Ssa_0625	up	7	916	9654	1442581	0.68189	1.142	0.457693	2.36324	1	RLX	FALSE
Ssa_1673	up	0	151	9661	1443346	0.630881	0	0	3.69542	1	XXX	FALSE
Ssa_1467	up	20	1556	9641	1441941	0.00729942	1.922	1.17045	2.98082	0.1	XXX	FALSE
Ssa_1966	up	6	464	9655	1443033	0.139764	1.933	0.70541	4.24021	0.629	XXX	FALSE
Ssa_0390	up	31	1574	9630	1441923	2.71355e-07	2.949	1.99566	4.20541	0	RIL	TRUE
Ssa_1464	up	1	303	9660	1443194	0.728437	0.493	0.0124442	2.76865	1	XXX	FALSE
Ssa_1183	up	2	628	9659	1442869	0.455237	0.476	0.0574842	1.72617	1	XXX	FALSE
Ssa_1190	up	1	106	9660	1443391	0.510204	1.41	0.0353554	8.02693	1	XXX	FALSE
Ssa_0417	up	12	1316	9649	1442181	0.305479	1.363	0.702168	2.38992	0.915	RYD	FALSE
Ssa_0433	up	0	644	9661	1442853	0.0258673	0	0	0.858097	0.228	RLG	FALSE
Ssa_0310	up	9	578	9652	1442919	0.0182125	2.328	1.0587	4.45155	0.188	RIL	FALSE
Ssa_0173	up	3	205	9658	1443292	0.161865	2.187	0.44722	6.48357	0.672	DTA	FALSE
Ssa_0015	up	7	641	9654	1442856	0.215217	1.632	0.653386	3.38346	0.768	DTX	FALSE
Ssa_0674	up	17	1338	9644	1442159	0.0169672	1.9	1.10304	3.05529	0.183	DTX	FALSE
Ssa_0102	up	18	3602	9643	1439895	0.258563	0.746	0.441564	1.18165	0.847	DTA	FALSE
Ssa_1414	up	10	728	9651	1442769	0.0353379	2.053	0.980242	3.80007	0.293	XXX	FALSE
Ssa_1600	up	8	232	9653	1443265	0.000236686	5.156	2.19917	10.335	0.007	XXX	TRUE
Ssa_1430	up	7	658	9654	1442839	0.222794	1.59	0.636563	3.29569	0.781	XXX	FALSE
Ssa_0033	up	2	249	9659	1443248	0.685111	1.2	0.144534	4.38191	1	DTX	FALSE
Ssa_0143	up	0	203	9661	1443294	0.649215	0	0	2.74008	1	DTA	FALSE
Ssa_0719	up	8	575	9653	1442922	0.0639444	2.08	0.893339	4.12741	0.406	DTA	FALSE
Ssa_1820	up	7	948	9654	1442549	0.68981	1.103	0.442276	2.28295	1	XXX	FALSE
Ssa_1163	up	2	178	9659	1443319	0.336417	1.679	0.201725	6.1568	0.959	XXX	FALSE
Ssa_0123	up	12	1063	9649	1442434	0.0857069	1.688	0.868907	2.96187	0.48	DTA	FALSE
Ssa_1200	up	1	357	9660	1443140	0.737175	0.418	0.0105671	2.3471	1	XXX	FALSE
Ssa_1390	up	3	914	9658	1442583	0.303982	0.49	0.100898	1.43772	0.915	XXX	FALSE
Ssa_0811	up	4	304	9657	1443193	0.150972	1.966	0.532245	5.08874	0.651	RIC	FALSE
Ssa_0707	up	3	214	9658	1443283	0.176438	2.095	0.428569	6.20694	0.703	RYD	FALSE
Ssa_0971	up	2	420	9659	1443077	1	0.711	0.0858628	2.5868	1	XXX	FALSE
Ssa_0084	up	0	126	9661	1443371	1	0	0	4.43947	1	DTA	FALSE
Ssa_0460	up	8	1311	9653	1442186	1	0.912	0.392634	1.8024	1	RLG	FALSE
Ssa_0091	up	0	277	9661	1443220	0.27239	0	0	2.00316	0.87	DTA	FALSE
Ssa_0256	up	5	540	9656	1442957	0.420292	1.384	0.447348	3.24986	1	DTT	FALSE
Ssa_1261	up	1	92	9660	1443405	0.462257	1.624	0.0406789	9.2794	1	XXX	FALSE
Ssa_1449	up	6	520	9655	1442977	0.171208	1.724	0.629787	3.78038	0.697	XXX	FALSE
Ssa_0793	up	1	190	9660	1443307	1	0.786	0.0198042	4.43551	1	DTT	FALSE
Ssa_0424	up	7	1120	9654	1442377	1	0.934	0.374454	1.93101	1	RLE	FALSE
Ssa_0590	up	7	489	9654	1443008	0.0501786	2.14	0.855505	4.44371	0.355	RLX	FALSE
Ssa_1534	up	2	217	9659	1443280	0.659877	1.377	0.165734	5.03641	1	XXX	FALSE
Ssa_1297	up	1	225	9660	1443272	1	0.664	0.0167366	3.73844	1	XXX	FALSE
Ssa_0306	up	0	349	9661	1443148	0.18291	0	0	1.5876	0.715	RIL	FALSE
Ssa_0876	up	1	160	9660	1443337	1	0.934	0.0234953	5.27886	1	RIR	FALSE
Ssa_1411	up	3	403	9658	1443094	0.754509	1.112	0.22838	3.27492	1	XXX	FALSE
Ssa_0449	up	8	1123	9653	1442374	0.853219	1.064	0.458293	2.10549	1	RLG	FALSE
Ssa_1444	up	7	1549	9654	1441948	0.431253	0.675	0.270854	1.39458	1	XXX	FALSE
Ssa_1169	up	2	507	9659	1442990	0.780329	0.589	0.071164	2.14041	1	XXX	FALSE
Ssa_0255	up	7	815	9654	1442682	0.512836	1.284	0.51427	2.65762	1	DTT	FALSE
Ssa_1844	up	1	60	9660	1443437	0.334294	2.49	0.0620244	14.4216	0.956	XXX	FALSE
Ssa_0874	up	9	865	9652	1442632	0.20334	1.555	0.708473	2.96725	0.747	RIJ	FALSE
Ssa_0720	up	1	216	9660	1443281	1	0.692	0.0174309	3.89555	1	DTA	FALSE
Ssa_0597	up	7	640	9654	1442857	0.214807	1.635	0.654403	3.38881	0.768	RLX	FALSE
Ssa_0308	up	4	576	9657	1442921	0.797455	1.038	0.281701	2.67202	1	RIL	FALSE
Ssa_0437	up	0	637	9661	1442860	0.025696	0	0	0.867558	0.227	RLG	FALSE
Ssa_0262	up	8	1694	9653	1441803	0.45219	0.705	0.30395	1.3936	1	DTB	FALSE
Ssa_0461	up	14	1712	9647	1441785	0.455322	1.222	0.666492	2.05731	1	RLG	FALSE
Ssa_0488	up	1	390	9660	1443107	0.529995	0.383	0.00967532	2.1472	1	RST	FALSE
Ssa_0344	up	1	650	9660	1442847	0.142014	0.23	0.0058115	1.28512	0.633	RIN	FALSE
Ssa_1359	up	0	54	9661	1443443	1	0	0	10.5664	1	XXX	FALSE
Ssa_0783	up	1	25	9660	1443472	0.159227	5.977	0.145563	36.4866	0.669	DTT	FALSE
Ssa_1161	up	2	348	9659	1443149	1	0.859	0.103564	3.12604	1	XXX	FALSE
Ssa_1712	up	2	188	9659	1443309	0.360395	1.59	0.191067	5.82422	0.991	XXX	FALSE
Ssa_0529	up	21	981	9640	1442516	6.30196e-06	3.203	1.97289	4.92708	0	RLX	TRUE
Ssa_1507	up	11	719	9650	1442778	0.010938	2.287	1.13631	4.11944	0.138	XXX	FALSE
Ssa_1150	up	4	816	9657	1442681	0.827329	0.732	0.199016	1.88282	1	XXX	FALSE
Ssa_0559	up	11	779	9650	1442718	0.0236178	2.111	1.04912	3.80038	0.215	RLX	FALSE
Ssa_1723	up	3	173	9658	1443324	0.113493	2.591	0.529163	7.70308	0.564	XXX	FALSE
Ssa_1721	up	0	23	9661	1443474	1	0	0	26.0042	1	XXX	FALSE
Ssa_1791	up	1	365	9660	1443132	0.739557	0.409	0.0103362	2.29532	1	XXX	FALSE
Ssa_1415	up	4	483	9657	1443014	0.5714	1.237	0.33575	3.18991	1	XXX	FALSE
Ssa_1976	up	17	2198	9644	1441299	0.511828	1.156	0.671833	1.85599	1	XXX	FALSE
Ssa_0588	up	50	2663	9611	1440834	3.75459e-10	2.815	2.08235	3.72484	0	RLX	TRUE
Ssa_2002	up	2	141	9659	1443356	0.246051	2.12	0.254168	7.80107	0.826	XXX	FALSE
Ssa_0642	up	6	556	9655	1442941	0.286551	1.613	0.589179	3.53398	0.891	DTX	FALSE
Ssa_0382	up	23	6145	9638	1437352	0.00350884	0.558	0.353401	0.838831	0.062	RIJ	FALSE
Ssa_1562	up	1	244	9660	1443253	1	0.612	0.0154384	3.44451	1	XXX	FALSE
Ssa_1158	up	3	710	9658	1442787	0.640832	0.631	0.129839	1.85266	1	XXX	FALSE
Ssa_0341	up	2	170	9659	1443327	0.317041	1.758	0.211146	6.4505	0.929	RIJ	FALSE
Ssa_0063	up	7	582	9654	1442915	0.121003	1.798	0.719359	3.72933	0.583	DTC	FALSE
Ssa_1993	up	1	195	9660	1443302	1	0.766	0.0192989	4.32058	1	XXX	FALSE
Ssa_1530	up	0	149	9661	1443348	1	0	0	3.74564	1	XXX	FALSE
Ssa_0849	up	2	524	9659	1442973	0.594081	0.57	0.0688604	2.07062	1	RIN	FALSE
Ssa_0291	up	3	577	9658	1442920	1	0.777	0.159673	2.28214	1	RIC	FALSE
Ssa_0157	up	7	401	9654	1443096	0.020607	2.609	1.04209	5.4289	0.197	DTA	FALSE
Ssa_1398	up	5	1407	9656	1442090	0.187502	0.531	0.172036	1.24191	0.726	XXX	FALSE
Ssa_0725	up	0	255	9661	1443242	0.423742	0	0	2.17706	1	DTA	FALSE
Ssa_1848	up	21	6215	9640	1437282	0.000733323	0.504	0.311492	0.771234	0.018	XXX	FALSE
Ssa_1577	up	2	227	9659	1443270	0.667297	1.316	0.158471	4.81187	1	XXX	FALSE
Ssa_0779	up	7	512	9654	1442985	0.0922182	2.044	0.817255	4.2424	0.501	DTS	FALSE
Ssa_1144	up	0	222	9661	1443275	0.412105	0	0	2.5036	1	XXX	FALSE
Ssa_0427	up	3	1083	9658	1442414	0.133484	0.414	0.0851656	1.21262	0.616	RLE	FALSE
Ssa_0537	up	3	241	9658	1443256	0.222051	1.86	0.380883	5.50326	0.78	RLX	FALSE
Ssa_1484	up	0	19	9661	1443478	1	0	0	32.0068	1	XXX	FALSE
Ssa_0283	up	3	1124	9658	1442373	0.136831	0.399	0.0820607	1.16824	0.624	RIC	FALSE
Ssa_0467	up	3	178	9658	1443319	0.120647	2.519	0.514444	7.48336	0.583	RLG	FALSE
Ssa_0587	up	18	487	9643	1443010	1.56296e-08	5.532	3.24864	8.83993	0	RLX	TRUE
Ssa_0926	up	5	616	9656	1442881	0.61518	1.213	0.392336	2.84683	1	RLG	FALSE
Ssa_0825	up	0	44	9661	1443453	1	0	0	13.0644	1	RIL	FALSE
Ssa_0475	up	12	1375	9649	1442122	0.320293	1.304	0.672083	2.28679	0.933	RLG	FALSE
Ssa_0331	up	1	167	9660	1443330	1	0.895	0.0225161	5.05477	1	RIL	FALSE
Ssa_0568	up	2	262	9659	1443235	0.696314	1.141	0.137367	4.16264	1	RLX	FALSE
Ssa_1982	up	5	511	9656	1442986	0.403599	1.462	0.472649	3.43583	1	XXX	FALSE
Ssa_1194	up	1	215	9660	1443282	1	0.695	0.0175116	3.91386	1	XXX	FALSE
Ssa_0320	up	4	103	9657	1443394	0.00585644	5.804	1.55185	15.3169	0.084	RIL	TRUE
Ssa_1501	up	2	69	9659	1443428	0.0813177	4.332	0.514241	16.2533	0.464	XXX	FALSE
Ssa_0397	up	6	389	9655	1443108	0.0503573	2.305	0.840658	5.06487	0.355	RIL	FALSE
Ssa_1450	up	9	1591	9652	1441906	0.757751	0.845	0.385589	1.60895	1	XXX	FALSE
Ssa_1263	up	8	526	9653	1442971	0.028232	2.274	0.976127	4.51446	0.246	XXX	FALSE
Ssa_1312	up	8	60	9653	1443437	1.97337e-08	19.939	8.22959	41.871	0	XXX	TRUE
Ssa_0792	up	3	723	9658	1442774	0.642767	0.62	0.127509	1.81927	1	DTT	FALSE
Ssa_0418	up	9	807	9652	1442690	0.126545	1.667	0.759272	3.18174	0.589	RYD	FALSE
Ssa_1305	up	7	236	9654	1443261	0.00133803	4.435	1.76303	9.28256	0.029	XXX	TRUE
Ssa_0939	up	22	1595	9639	1441902	0.00188049	2.063	1.2887	3.13652	0.038	RLG	TRUE
Ssa_1212	up	1	107	9660	1443390	0.513461	1.396	0.035028	7.95035	1	XXX	FALSE
Ssa_0060	up	6	638	9655	1442859	0.332153	1.405	0.513703	3.07708	0.955	DTC	FALSE
Ssa_2000	up	6	1071	9655	1442426	0.850728	0.837	0.306382	1.82834	1	XXX	FALSE
Ssa_0008	up	2	662	9659	1442835	0.339862	0.451	0.0545368	1.63718	0.966	DYC	FALSE
Ssa_0667	up	4	663	9657	1442834	1	0.901	0.244831	2.31959	1	DTX	FALSE
Ssa_1545	up	1	157	9660	1443340	1	0.952	0.0239415	5.38096	1	XXX	FALSE
Ssa_0616	up	21	2059	9640	1441438	0.0580124	1.525	0.941526	2.33896	0.381	RLX	FALSE
Ssa_0022	up	5	1340	9656	1442157	0.237544	0.557	0.180619	1.30426	0.812	DTX	FALSE
Ssa_0408	up	1	440	9660	1443057	0.381315	0.34	0.00857842	1.90193	1	RLB	FALSE
Ssa_1616	up	9	2721	9652	1440776	0.0324534	0.494	0.225456	0.939038	0.273	XXX	FALSE
Ssa_1470	up	0	219	9661	1443278	0.411742	0	0	2.53819	1	XXX	FALSE
Ssa_1959	up	1	645	9660	1442852	0.141483	0.232	0.00585647	1.29512	0.633	XXX	FALSE
Ssa_0580	up	27	1119	9634	1442378	3.33755e-08	3.613	2.36869	5.2878	0	RLX	TRUE
Ssa_0014	up	2	251	9659	1443246	0.686808	1.191	0.143387	4.347	1	DTX	FALSE
Ssa_0606	up	3	273	9658	1443224	0.437217	1.642	0.336509	4.85147	1	RLX	FALSE
Ssa_0129	up	2	495	9659	1443002	0.778491	0.604	0.0728851	2.19259	1	DTA	FALSE
Ssa_1623	up	0	50	9661	1443447	1	0	0	11.4445	1	XXX	FALSE
Ssa_0528	up	17	2469	9644	1441028	0.901231	1.029	0.598098	1.65159	1	RLX	FALSE
Ssa_1979	up	1	251	9660	1443246	1	0.595	0.015012	3.34758	1	XXX	FALSE
Ssa_1751	up	5	1529	9656	1441968	0.114524	0.488	0.158298	1.14251	0.565	XXX	FALSE
Ssa_0575	up	13	1864	9648	1441633	0.776998	1.042	0.553625	1.78733	1	RLX	FALSE
Ssa_0169	up	0	52	9661	1443445	1	0	0	10.9879	1	DTA	FALSE
Ssa_0387	up	13	869	9648	1442628	0.00995806	2.237	1.18579	3.84734	0.128	RIL	FALSE
Ssa_0690	up	3	222	9658	1443275	0.189682	2.019	0.413239	5.98049	0.727	DTX	FALSE
Ssa_0104	up	0	93	9661	1443404	1	0	0	6.04646	1	DTA	FALSE
Ssa_1417	up	4	557	9657	1442940	0.791984	1.073	0.291282	2.76371	1	XXX	FALSE
Ssa_0189	up	4	663	9657	1442834	1	0.901	0.244831	2.31959	1	DTT	FALSE
Ssa_1985	up	14	945	9647	1442552	0.00753166	2.215	1.206	3.73748	0.101	XXX	FALSE
Ssa_0338	up	0	507	9661	1442990	0.0890933	0	0	1.09091	0.492	RIJ	FALSE
Ssa_0058	up	1	117	9660	1443380	0.544859	1.277	0.032059	7.25766	1	DTC	FALSE
Ssa_0782	up	3	1660	9658	1441837	0.00937052	0.27	0.0555803	0.790078	0.124	DTT	FALSE
Ssa_0176	up	4	326	9657	1443171	0.178908	1.834	0.496524	4.74207	0.707	DTA	FALSE
Ssa_0573	up	20	1325	9641	1442172	0.00105718	2.258	1.37403	3.50327	0.024	RLX	TRUE
Ssa_1971	up	22	2221	9639	1441276	0.0683929	1.481	0.925846	2.24935	0.428	XXX	FALSE
Ssa_0807	up	3	752	9658	1442745	0.501442	0.596	0.1226	1.74883	1	RIC	FALSE
Ssa_1851	up	1	165	9660	1443332	1	0.906	0.0227874	5.11686	1	XXX	FALSE
Ssa_0957	up	6	506	9655	1442991	0.16209	1.772	0.647132	3.8856	0.672	RLG	FALSE
Ssa_1524	up	5	221	9656	1443276	0.0182929	3.382	1.08701	8.01426	0.188	XXX	FALSE
Ssa_0524	up	4	591	9657	1442906	0.802127	1.011	0.274571	2.60381	1	RLX	FALSE
Ssa_0146	up	1	294	9660	1443203	1	0.508	0.0128238	2.85409	1	DTA	FALSE
Ssa_0493	up	1	339	9660	1443158	0.732736	0.441	0.0111266	2.47259	1	RST	FALSE
Ssa_0414	up	14	1667	9647	1441830	0.365766	1.255	0.684464	2.11305	0.997	RYD	FALSE
Ssa_1251	up	0	200	9661	1443297	0.647413	0	0	2.78156	1	XXX	FALSE
Ssa_1394	up	0	323	9661	1443174	0.285762	0	0	1.71608	0.891	XXX	FALSE
Ssa_0569	up	4	471	9657	1443026	0.563983	1.269	0.344271	3.27187	1	RLX	FALSE
Ssa_0465	up	5	867	9656	1442630	1	0.862	0.27899	2.01915	1	RLG	FALSE
Ssa_0165	up	6	300	9655	1443197	0.0174505	2.989	1.08815	6.58625	0.185	DTA	FALSE
Ssa_1466	up	0	38	9661	1443459	1	0	0	15.2321	1	XXX	FALSE
Ssa_0056	up	0	69	9661	1443428	1	0	0	8.20767	1	DTX	FALSE
Ssa_0935	up	4	1021	9657	1442476	0.436082	0.585	0.159105	1.50341	1	RLG	FALSE
Ssa_0009	up	7	809	9654	1442688	0.511214	1.293	0.518074	2.67743	1	DYC	FALSE
Ssa_0729	up	0	146	9661	1443351	1	0	0	3.82359	1	DTA	FALSE
Ssa_1544	up	3	150	9658	1443347	0.0828651	2.989	0.60942	8.90632	0.468	XXX	FALSE
Ssa_1404	up	9	1045	9652	1442452	0.442696	1.287	0.58671	2.45376	1	XXX	FALSE
Ssa_1878	up	1	141	9660	1443356	0.612195	1.06	0.0266396	6.00239	1	XXX	FALSE
Ssa_1145	up	6	542	9655	1442955	0.187049	1.654	0.604305	3.62583	0.726	XXX	FALSE
Ssa_0521	up	0	55	9661	1443442	1	0	0	10.3676	1	RLX	FALSE
Ssa_1431	up	3	417	9658	1443080	0.760692	1.075	0.220746	3.1643	1	XXX	FALSE
Ssa_0594	up	8	915	9653	1442582	0.413044	1.307	0.562211	2.58654	1	RLX	FALSE
Ssa_1155	up	1	297	9660	1443200	1	0.503	0.0126947	2.82503	1	XXX	FALSE
Ssa_0872	up	11	1254	9650	1442243	0.381625	1.311	0.652536	2.35494	1	RIR	FALSE
Ssa_0746	up	6	1437	9655	1442060	0.327673	0.624	0.228418	1.36122	0.945	DTT	FALSE
Ssa_0221	up	1	114	9660	1443383	0.535659	1.311	0.0328955	7.45248	1	DTT	FALSE
Ssa_1789	up	43	2385	9618	1441112	1.84494e-08	2.701	1.94858	3.65317	0	XXX	TRUE
Ssa_1403	up	119	6824	9542	1436673	1.56934e-19	2.626	2.16936	3.15119	0	XXX	TRUE
Ssa_1343	up	3	109	9658	1443388	0.0392338	4.113	0.835213	12.3455	0.312	XXX	FALSE
Ssa_1847	up	35	3701	9626	1439796	0.0541736	1.414	0.983137	1.97237	0.371	XXX	FALSE
Ssa_1437	up	1	290	9660	1443207	1	0.515	0.0130001	2.89352	1	XXX	FALSE
Ssa_0715	up	7	856	9654	1442641	0.526662	1.222	0.489673	2.52977	1	DTA	FALSE
Ssa_1153	up	5	229	9656	1443268	0.0208916	3.263	1.04943	7.73015	0.197	XXX	FALSE
Ssa_0940	up	9	939	9652	1442558	0.310074	1.432	0.652783	2.73217	0.921	RLG	FALSE
Ssa_0670	up	7	801	9654	1442696	0.389414	1.306	0.523234	2.70431	1	DTX	FALSE
Ssa_0581	up	19	1019	9642	1442478	0.000100706	2.789	1.67172	4.38128	0.003	RLX	TRUE
Ssa_0561	up	10	550	9651	1442947	0.00488713	2.718	1.29584	5.03958	0.076	RLX	TRUE
Ssa_1148	up	4	900	9657	1442597	0.539641	0.664	0.180479	1.70638	1	XXX	FALSE
Ssa_1303	up	1	262	9660	1443235	1	0.57	0.0143841	3.20579	1	XXX	FALSE
Ssa_0661	up	5	323	9656	1443174	0.0697505	2.314	0.746004	5.45669	0.43	DTX	FALSE
Ssa_0119	up	3	157	9658	1443340	0.0917666	2.856	0.58254	8.50253	0.5	DTA	FALSE
Ssa_0943	up	2	224	9659	1443273	0.665019	1.334	0.160583	4.87712	1	RLG	FALSE
Ssa_0558	up	7	666	9654	1442831	0.226745	1.571	0.628961	3.25587	0.789	RLX	FALSE
Ssa_0889	up	0	242	9661	1443255	0.417604	0	0	2.29513	1	RIL	FALSE
Ssa_0273	up	10	7650	9651	1435847	6.05213e-12	0.194	0.0931896	0.358012	0	DTT	FALSE
Ssa_1320	up	0	143	9661	1443354	1	0	0	3.90485	1	XXX	FALSE
Ssa_1428	up	7	400	9654	1443097	0.0203664	2.616	1.04468	5.44261	0.197	XXX	FALSE
Ssa_0607	up	20	1734	9641	1441763	0.0253712	1.725	1.05047	2.67366	0.227	RLX	FALSE
Ssa_0608	up	20	739	9641	1442758	3.40712e-07	4.05	2.45818	6.30521	0	RLX	TRUE
Ssa_0589	up	11	595	9650	1442902	0.00288042	2.764	1.37203	4.98441	0.053	RLX	TRUE
Ssa_0356	up	1	312	9660	1443185	0.728868	0.479	0.0120863	2.68816	1	RIR	FALSE
Ssa_0184	up	2	529	9659	1442968	0.59427	0.565	0.068211	2.05094	1	DTA	FALSE
Ssa_0878	up	0	66	9661	1443431	1	0	0	8.59102	1	RIR	FALSE
Ssa_0357	up	18	1823	9643	1441674	0.111327	1.476	0.872511	2.341	0.558	RIR	FALSE
Ssa_0227	up	0	386	9661	1443111	0.193296	0	0	1.43469	0.727	DTT	FALSE
Ssa_1443	up	20	1071	9641	1442426	6.58846e-05	2.794	1.69887	4.33916	0.002	XXX	TRUE
Ssa_1278	up	4	361	9657	1443136	0.314035	1.656	0.44864	4.27772	0.927	XXX	FALSE
Ssa_0672	up	1	141	9660	1443356	0.612195	1.06	0.0266396	6.00239	1	DTX	FALSE
Ssa_0696	up	1	560	9660	1442937	0.196384	0.267	0.00674365	1.49263	0.732	DTX	FALSE
Ssa_1374	up	2	916	9659	1442581	0.103302	0.326	0.0394283	1.18165	0.531	XXX	FALSE
Ssa_0080	up	1	301	9660	1443196	0.728405	0.496	0.0125266	2.78719	1	DTA	FALSE
Ssa_0596	up	13	536	9648	1442961	0.000105674	3.628	1.9182	6.25982	0.003	RLX	TRUE
Ssa_0735	up	0	50	9661	1443447	1	0	0	11.4445	1	DYC	FALSE
Ssa_0264	up	8	2405	9653	1441092	0.0435409	0.497	0.214084	0.980468	0.33	DTS	FALSE
Ssa_1134	up	2	213	9659	1443284	0.65706	1.403	0.168829	5.13161	1	XXX	FALSE
Ssa_0167	up	9	894	9652	1442603	0.213529	1.505	0.685551	2.87039	0.767	DTA	FALSE
Ssa_0263	up	3	1518	9658	1441979	0.0171141	0.295	0.0607785	0.864215	0.184	DMM	FALSE
Ssa_0121	up	0	116	9661	1443381	1	0	0	4.82863	1	DTA	FALSE
Ssa_0410	up	13	1197	9648	1442300	0.105831	1.624	0.861609	2.78836	0.535	RLC	FALSE
Ssa_0087	up	15	1903	9646	1441594	0.481054	1.178	0.657754	1.94895	1	DTA	FALSE
Ssa_0577	up	39	1807	9622	1441690	7.71525e-10	3.234	2.2903	4.44149	0	RLX	TRUE
Ssa_0088	up	16	3362	9645	1440135	0.202082	0.711	0.405533	1.15625	0.744	DTA	FALSE
Ssa_0432	up	1	304	9660	1443193	0.728462	0.491	0.0124034	2.75947	1	RLG	FALSE
Ssa_0533	up	4	249	9657	1443248	0.089851	2.401	0.648921	6.22634	0.492	RLX	FALSE
Ssa_0152	up	12	1733	9649	1441764	0.882075	1.035	0.533398	1.81292	1	DTA	FALSE
Ssa_0517	up	11	953	9650	1442544	0.0731789	1.725	0.858096	3.1025	0.438	RLX	FALSE
Ssa_0182	up	16	1140	9645	1442357	0.00602139	2.099	1.19509	3.42486	0.085	DTA	TRUE
Ssa_0415	up	2	265	9659	1443232	0.698949	1.128	0.135821	4.11505	1	RYD	FALSE
Ssa_0035	up	2	514	9659	1442983	0.781564	0.581	0.0701971	2.11117	1	DTX	FALSE
Ssa_1458	up	1	139	9660	1443358	0.606987	1.075	0.0270203	6.09027	1	XXX	FALSE
Ssa_0421	up	8	2157	9653	1441340	0.109745	0.554	0.238711	1.09359	0.552	RLE	FALSE
Ssa_0422	up	7	1021	9654	1442476	0.847255	1.024	0.410707	2.11919	1	RLE	FALSE
Ssa_0698	up	1	491	9660	1443006	0.39285	0.304	0.00768927	1.7034	1	DTX	FALSE
Ssa_0673	up	2	409	9659	1443088	1	0.731	0.0881652	2.65684	1	DTX	FALSE
Ssa_0751	up	2	480	9659	1443017	0.776727	0.622	0.0751571	2.2615	1	DTT	FALSE
Ssa_0639	up	3	543	9658	1442954	1	0.825	0.169655	2.42581	1	DTX	FALSE
Ssa_1174	up	4	687	9657	1442810	1	0.87	0.236299	2.23806	1	XXX	FALSE
Ssa_1977	up	12	1220	9649	1442277	0.213768	1.47	0.757314	2.57888	0.767	XXX	FALSE
Ssa_0426	up	2	641	9659	1442856	0.45824	0.466	0.0563204	1.69099	1	RLE	FALSE
Ssa_0936	up	2	535	9659	1442962	0.594649	0.558	0.0674477	2.02781	1	RLG	FALSE
Ssa_1856	up	9	1157	9652	1442340	0.586739	1.162	0.530017	2.21516	1	XXX	FALSE
Ssa_0442	up	5	767	9656	1442730	1	0.974	0.315264	2.28359	1	RLG	FALSE
Ssa_0554	up	3	328	9658	1443169	0.487527	1.367	0.280347	4.03056	1	RLX	FALSE
Ssa_0181	up	3	370	9658	1443127	0.741827	1.212	0.248662	3.56934	1	DTA	FALSE
Ssa_1410	up	14	672	9647	1442825	0.000268963	3.116	1.69361	5.26758	0.008	XXX	TRUE
Ssa_0540	up	9	777	9652	1442720	0.116126	1.731	0.788469	3.30508	0.569	RLX	FALSE
Ssa_0054	up	4	256	9657	1443241	0.0968401	2.335	0.631304	6.05408	0.513	DTX	FALSE
Ssa_0635	up	8	982	9653	1442515	0.552653	1.217	0.523961	2.40923	1	DTX	FALSE
Ssa_1980	up	6	398	9655	1443099	0.0549677	2.253	0.821757	4.94945	0.371	XXX	FALSE
Ssa_0549	up	11	650	9650	1442847	0.00545727	2.53	1.25641	4.55938	0.081	RLX	TRUE
Ssa_0043	up	3	442	9658	1443055	0.772592	1.014	0.208304	2.98383	1	DTX	FALSE
Ssa_0831	up	0	39	9661	1443458	1	0	0	14.8223	1	RIL	FALSE
Ssa_1460	up	4	551	9657	1442946	0.790375	1.085	0.29444	2.7942	1	XXX	FALSE
Ssa_1841	up	0	188	9661	1443309	0.640947	0	0	2.96078	1	XXX	FALSE
Ssa_0026	up	9	729	9652	1442768	0.0687424	1.845	0.840198	3.52404	0.428	DTX	FALSE
Ssa_0367	up	4	624	9657	1442873	1	0.958	0.260081	2.46527	1	RIR	FALSE
Ssa_0480	up	16	2676	9645	1440821	0.811558	0.893	0.509577	1.45395	1	RSD	FALSE
Ssa_0862	up	4	662	9657	1442835	1	0.903	0.2452	2.32311	1	RIR	FALSE
Ssa_0134	up	4	985	9657	1442512	0.43116	0.607	0.164891	1.55857	1	DTA	FALSE
Ssa_1147	up	3	650	9658	1442847	0.806693	0.69	0.141807	2.02461	1	XXX	FALSE
Ssa_1140	up	3	916	9658	1442581	0.304279	0.489	0.100678	1.43457	0.915	XXX	FALSE
Ssa_0614	up	11	166	9650	1443331	3.95918e-08	9.911	4.85164	18.2036	0	RLX	TRUE
Ssa_0548	up	6	281	9655	1443216	0.0131392	3.192	1.16112	7.0371	0.157	RLX	FALSE
Ssa_1699	up	11	1106	9650	1442391	0.192114	1.487	0.739677	2.67169	0.727	XXX	FALSE
Ssa_1798	up	0	74	9661	1443423	1	0	0	7.63958	1	XXX	FALSE
Ssa_1978	up	3	517	9658	1442980	1	0.867	0.178168	2.54851	1	XXX	FALSE
Ssa_0425	up	6	815	9655	1442682	0.669645	1.1	0.402414	2.40559	1	RLE	FALSE
Ssa_0295	up	5	1292	9656	1442205	0.300817	0.578	0.187321	1.35285	0.914	RIC	FALSE
Ssa_0274	up	2	1097	9659	1442400	0.0405191	0.272	0.0329188	0.986089	0.315	DTT	FALSE
Ssa_0846	up	2	378	9659	1443119	1	0.791	0.0953718	2.8762	1	RIN	FALSE
Ssa_1804	up	81	3161	9580	1440336	5.08985e-23	3.853	3.04827	4.80852	0	XXX	TRUE
Ssa_1893	up	16	1619	9645	1441878	0.125004	1.477	0.842107	2.40784	0.586	XXX	FALSE
Ssa_0122	up	19	2401	9642	1441096	0.450605	1.183	0.710481	1.85212	1	DTA	FALSE
Ssa_0214	up	28	2592	9633	1440905	0.0155785	1.616	1.07097	2.34234	0.175	DTT	FALSE
Ssa_1339	up	3	179	9658	1443318	0.122098	2.505	0.511596	7.44091	0.583	XXX	FALSE
Ssa_1718	up	0	111	9661	1443386	1	0	0	5.04996	1	XXX	FALSE
Ssa_0815	up	0	49	9661	1443448	1	0	0	11.6873	1	RIC	FALSE
Ssa_0423	up	2	1335	9659	1442162	0.0163453	0.224	0.027066	0.809818	0.179	RLE	FALSE
Ssa_0630	up	1	360	9660	1443137	0.738041	0.415	0.0104793	2.32741	1	DTX	FALSE
Ssa_1429	up	5	1072	9656	1442425	0.571348	0.697	0.225717	1.63161	1	XXX	FALSE
Ssa_0302	up	3	465	9658	1443032	1	0.964	0.198033	2.83543	1	RIC	FALSE
Ssa_0814	up	1	238	9660	1443259	1	0.628	0.0158261	3.53248	1	RIC	FALSE
Ssa_0636	up	11	355	9650	1443142	4.41557e-05	4.634	2.29149	8.39551	0.002	DTX	TRUE
Ssa_0806	up	0	73	9661	1443424	1	0	0	7.74681	1	RIC	FALSE
Ssa_0141	up	0	241	9661	1443256	0.41721	0	0	2.30474	1	DTA	FALSE
Ssa_0145	up	3	603	9658	1442894	0.803965	0.743	0.152856	2.18318	1	DTA	FALSE
Ssa_0179	up	5	211	9656	1443286	0.0153564	3.542	1.13802	8.39928	0.174	DTA	FALSE
Ssa_0621	up	4	341	9657	1443156	0.298967	1.753	0.474838	4.53133	0.91	RLX	FALSE
Ssa_1492	up	0	175	9661	1443322	0.635498	0	0	3.18332	1	XXX	FALSE
Ssa_1806	up	2	397	9659	1443100	1	0.753	0.0908218	2.73769	1	XXX	FALSE
Ssa_0790	up	17	4121	9644	1439376	0.0435852	0.616	0.358161	0.987526	0.33	DTT	FALSE
Ssa_1629	up	1	88	9660	1443409	0.447715	1.698	0.0425075	9.71228	1	XXX	FALSE
Ssa_1400	up	1	150	9660	1443347	1	0.996	0.0250515	5.63656	1	XXX	FALSE
Ssa_1447	up	7	777	9654	1442720	0.376053	1.346	0.539342	2.78828	1	XXX	FALSE
Ssa_1974	up	7	402	9654	1443095	0.0208495	2.603	1.03951	5.41526	0.197	XXX	FALSE
Ssa_1160	up	1	159	9660	1443338	1	0.94	0.0236421	5.31247	1	XXX	FALSE
Ssa_0147	up	4	674	9657	1442823	1	0.887	0.240845	2.28154	1	DTA	FALSE
Ssa_1221	up	0	40	9661	1443457	1	0	0	14.434	1	XXX	FALSE
Ssa_0024	up	13	581	9648	1442916	0.000226599	3.346	1.77033	5.77042	0.007	DTX	TRUE
Ssa_1535	up	3	201	9658	1443296	0.15551	2.23	0.456052	6.61469	0.662	XXX	FALSE
Ssa_0047	up	6	1214	9655	1442283	0.595883	0.738	0.270347	1.61226	1	DTX	FALSE
Ssa_1469	up	0	386	9661	1443111	0.193296	0	0	1.43469	0.727	XXX	FALSE
Ssa_0443	up	3	736	9658	1442761	0.645178	0.609	0.12526	1.78708	1	RLG	FALSE
Ssa_1285	up	0	205	9661	1443292	0.650454	0	0	2.71311	1	XXX	FALSE
Ssa_1967	up	4	324	9657	1443173	0.1763	1.845	0.499573	4.77165	0.703	XXX	FALSE
Ssa_0316	up	0	338	9661	1443159	0.181896	0	0	1.63956	0.713	RIL	FALSE
Ssa_1282	up	2	358	9659	1443139	1	0.835	0.100681	3.03797	1	XXX	FALSE
Ssa_1550	up	3	84	9658	1443413	0.0205867	5.338	1.0789	16.1425	0.197	XXX	FALSE
Ssa_1420	up	3	342	9658	1443155	0.502647	1.311	0.268931	3.86428	1	XXX	FALSE
Ssa_0064	up	3	344	9658	1443153	0.504857	1.303	0.267374	3.84158	1	DTC	FALSE
Ssa_1260	up	1	199	9660	1443298	1	0.751	0.0189129	4.23288	1	XXX	FALSE
Ssa_1326	up	1	93	9660	1443404	0.465832	1.607	0.040246	9.17714	1	XXX	FALSE
Ssa_1392	up	1	675	9660	1442822	0.146143	0.221	0.00559662	1.23734	0.638	XXX	FALSE
Ssa_1963	up	5	790	9656	1442707	1	0.946	0.306128	2.21691	1	XXX	FALSE
Ssa_0138	up	1	419	9660	1443078	0.537513	0.357	0.00900731	1.99772	1	DTA	FALSE
Ssa_0470	up	3	477	9658	1443020	1	0.94	0.193067	2.76367	1	RLG	FALSE
Ssa_0369	up	0	136	9661	1443361	1	0	0	4.10859	1	RIR	FALSE
Ssa_0448	up	0	106	9661	1443391	1	0	0	5.29263	1	RLG	FALSE
Ssa_0933	up	2	450	9659	1443047	0.775177	0.664	0.0801542	2.41325	1	RLG	FALSE
Ssa_0151	up	2	438	9659	1443059	1	0.682	0.0823441	2.4798	1	DTA	FALSE
Ssa_0321	up	2	108	9659	1443389	0.166437	2.767	0.330862	10.2417	0.682	RIL	FALSE
Ssa_1625	up	0	110	9661	1443387	1	0	0	5.09669	1	XXX	FALSE
Ssa_0956	up	3	630	9658	1442867	0.805005	0.711	0.146309	2.08929	1	RLG	FALSE
Ssa_1537	up	0	96	9661	1443401	1	0	0	5.85357	1	XXX	FALSE
Ssa_0579	up	3	441	9658	1443056	0.772098	1.016	0.208775	2.99064	1	RLX	FALSE
Ssa_1385	up	1	469	9660	1443028	0.385833	0.319	0.00804916	1.78375	1	XXX	FALSE
Ssa_0109	up	0	43	9661	1443454	1	0	0	13.3819	1	DTA	FALSE
Ssa_1383	up	4	582	9657	1442915	0.79929	1.027	0.278805	2.64431	1	XXX	FALSE
Ssa_1567	up	4	196	9657	1443301	0.0455227	3.05	0.82269	7.9367	0.34	XXX	FALSE
Ssa_1960	up	6	1235	9655	1442262	0.597318	0.726	0.265761	1.58474	1	XXX	FALSE
Ssa_1189	up	5	312	9656	1443185	0.0622219	2.395	0.772128	5.65233	0.398	XXX	FALSE
Ssa_1829	up	3	238	9658	1443259	0.216866	1.884	0.38565	5.57358	0.771	XXX	FALSE
Ssa_0485	up	5	1036	9656	1442461	0.699454	0.721	0.233548	1.68853	1	RST	FALSE
Ssa_0612	up	24	771	9637	1442726	1.84912e-09	4.66	2.96586	6.98987	0	RLX	TRUE
Ssa_0440	up	2	905	9659	1442592	0.14525	0.33	0.0399073	1.19606	0.638	RLG	FALSE
Ssa_1505	up	6	310	9655	1443187	0.0200697	2.893	1.05329	6.37094	0.197	XXX	FALSE
Ssa_1481	up	2	502	9659	1442995	0.779519	0.595	0.0718711	2.16185	1	XXX	FALSE
Ssa_1336	up	1	77	9660	1443420	0.405664	1.941	0.0485035	11.1376	1	XXX	FALSE
Ssa_0520	up	11	878	9650	1442619	0.0569008	1.873	0.93119	3.36917	0.376	RLX	FALSE
Ssa_0669	up	3	711	9658	1442786	0.640963	0.63	0.129657	1.85017	1	DTX	FALSE
Ssa_1574	up	1	191	9660	1443306	1	0.782	0.0197011	4.41203	1	XXX	FALSE
Ssa_0704	up	0	7	9661	1443490	1	0	0	103.879	1	RYD	FALSE
Ssa_1220	up	0	24	9661	1443473	1	0	0	24.8314	1	XXX	FALSE
Ssa_0355	up	1	247	9660	1443250	1	0.605	0.0152542	3.40229	1	RIR	FALSE
Ssa_1975	up	8	884	9653	1442613	0.402496	1.352	0.581897	2.67767	1	XXX	FALSE
Ssa_0412	up	5	632	9656	1442865	0.621751	1.182	0.382434	2.77448	1	RLC	FALSE
Ssa_0901	up	1	408	9660	1443089	0.534053	0.366	0.00924954	2.052	1	RLE	FALSE
Ssa_0312	up	0	268	9661	1443229	0.431612	0	0	2.07073	1	RIL	FALSE
Ssa_1984	up	15	1916	9646	1441581	0.48368	1.17	0.653295	1.9357	1	XXX	FALSE
Ssa_0525	up	6	343	9655	1443154	0.0305689	2.615	0.95265	5.75243	0.265	RLX	FALSE
Ssa_1508	up	0	93	9661	1443404	1	0	0	6.04646	1	XXX	FALSE
Ssa_1709	up	0	256	9661	1443241	0.424288	0	0	2.16857	1	XXX	FALSE
Ssa_0007	up	5	1093	9656	1442404	0.573466	0.683	0.221399	1.60014	1	DYC	FALSE
Ssa_1997	up	4	324	9657	1443173	0.1763	1.845	0.499573	4.77165	0.703	XXX	FALSE
Ssa_1202	up	1	182	9660	1443315	1	0.821	0.0206702	4.63346	1	XXX	FALSE
Ssa_0299	up	3	669	9658	1442828	0.63812	0.67	0.137781	1.96679	1	RIC	FALSE
Ssa_0154	up	0	196	9661	1443301	0.645121	0	0	2.83885	1	DTA	FALSE
Ssa_0090	up	11	892	9650	1442605	0.0591915	1.844	0.916631	3.31599	0.383	DTA	FALSE
Ssa_1746	up	0	10	9661	1443487	1	0	0	66.6642	1	XXX	FALSE
Ssa_0434	up	2	287	9659	1443210	0.718623	1.041	0.125468	3.79685	1	RLG	FALSE
Ssa_0564	up	12	617	9649	1442880	0.00126316	2.908	1.49403	5.1195	0.028	RLX	TRUE
Ssa_1637	up	2	96	9659	1443401	0.138743	3.113	0.371641	11.5592	0.626	XXX	FALSE
Ssa_1914	up	0	5	9661	1443492	1	0	0	163.157	1	XXX	FALSE
Ssa_0655	up	6	828	9655	1442669	0.828797	1.083	0.396111	2.36765	1	DTX	FALSE
Ssa_0011	up	0	101	9661	1443396	1	0	0	5.558	1	DYC	FALSE
Ssa_0222	up	2	393	9659	1443104	1	0.76	0.0917433	2.76572	1	DTT	FALSE
Ssa_0186	up	6	1172	9655	1442325	0.717372	0.765	0.280018	1.67026	1	DTI	FALSE
Ssa_0463	up	7	482	9654	1443015	0.0471783	2.171	0.867867	4.50866	0.344	RLG	FALSE
Ssa_0130	up	2	187	9659	1443310	0.358011	1.598	0.192082	5.85579	0.987	DTA	FALSE
Ssa_0183	up	7	302	9654	1443195	0.00504358	3.465	1.38096	7.23	0.077	DTA	TRUE
Ssa_0603	up	5	338	9656	1443159	0.0807866	2.211	0.713102	5.21193	0.464	RLX	FALSE
Ssa_0231	up	1	231	9660	1443266	1	0.647	0.0163037	3.64027	1	DTT	FALSE
Ssa_1179	up	6	151	9655	1443346	0.000692877	5.94	2.14548	13.2336	0.018	XXX	TRUE
Ssa_0884	up	6	618	9655	1442879	0.318556	1.451	0.530269	3.17727	0.932	RIL	FALSE
Ssa_0392	up	3	396	9658	1443101	0.751578	1.132	0.23239	3.33322	1	RIL	FALSE
Ssa_1843	up	1	97	9660	1443400	0.479897	1.54	0.038603	8.78869	1	XXX	FALSE
Ssa_1317	up	0	4	9661	1443493	1	0	0	226.53	1	XXX	FALSE
Ssa_0877	up	0	386	9661	1443111	0.193296	0	0	1.43469	0.727	RIR	FALSE
Ssa_0232	up	2	294	9659	1443203	0.724956	1.016	0.122497	3.70569	1	DTT	FALSE
Ssa_1215	up	0	84	9661	1443413	1	0	0	6.7087	1	XXX	FALSE
Ssa_1646	up	0	74	9661	1443423	1	0	0	7.63958	1	XXX	FALSE
Ssa_1439	up	6	476	9655	1443021	0.145326	1.884	0.687714	4.13273	0.638	XXX	FALSE
Ssa_0738	up	1	102	9660	1443395	0.496959	1.465	0.0367287	8.34853	1	DTT	FALSE
Ssa_1405	up	2	575	9659	1442922	0.601149	0.52	0.0627719	1.88605	1	XXX	FALSE
Ssa_0950	up	1	442	9660	1443055	0.38144	0.338	0.00853969	1.89328	1	RLG	FALSE
Ssa_0343	up	7	1256	9654	1442241	0.861249	0.833	0.33397	1.72127	1	RIN	FALSE
Ssa_0602	up	68	2495	9593	1441002	6.14992e-21	4.094	3.16607	5.21418	0	RLX	TRUE
Ssa_0005	up	2	230	9659	1443267	0.669617	1.299	0.156415	4.74834	1	DYC	FALSE
Ssa_0477	up	1	912	9660	1442585	0.037369	0.164	0.00414417	0.914846	0.304	RLG	FALSE
Ssa_0300	up	3	264	9658	1443233	0.262511	1.698	0.347908	5.0186	0.853	RIC	FALSE
Ssa_0632	up	2	297	9659	1443200	0.727674	1.006	0.121267	3.66731	1	DTX	FALSE
Ssa_0634	up	0	212	9661	1443285	0.411406	0	0	2.62274	1	DTX	FALSE
Ssa_0105	up	4	310	9657	1443187	0.15842	1.928	0.522005	4.98933	0.668	DTA	FALSE
Ssa_0490	up	26	2638	9635	1440859	0.0551146	1.474	0.960503	2.1659	0.371	RST	FALSE
Ssa_1347	up	0	74	9661	1443423	1	0	0	7.63958	1	XXX	FALSE
Ssa_0133	up	0	122	9661	1443375	1	0	0	4.58723	1	DTA	FALSE
Ssa_0797	up	0	30	9661	1443467	1	0	0	19.5563	1	RIJ	FALSE
Ssa_0618	up	8	483	9653	1443014	0.0182957	2.476	1.06256	4.91993	0.188	RLX	FALSE
Ssa_0631	up	2	459	9659	1443038	0.775347	0.651	0.0785867	2.36558	1	DTX	FALSE
Ssa_1570	up	2	288	9659	1443209	0.719527	1.038	0.125035	3.7834	1	XXX	FALSE
Ssa_0773	up	6	306	9655	1443191	0.018992	2.931	1.06697	6.45455	0.193	DTB	FALSE
Ssa_0538	up	0	278	9661	1443219	0.272443	0	0	1.9959	0.87	RLX	FALSE
Ssa_1432	up	4	226	9657	1443271	0.0686989	2.645	0.714398	6.86823	0.428	XXX	FALSE
Ssa_0270	up	1	311	9660	1443186	0.728798	0.48	0.0121251	2.69687	1	DTT	FALSE
Ssa_0353	up	3	1084	9658	1442413	0.133519	0.413	0.0850871	1.2115	0.616	RIP	FALSE
Ssa_1809	up	0	46	9661	1443451	1	0	0	12.4821	1	XXX	FALSE
Ssa_1237	up	1	39	9660	1443458	0.234191	3.831	0.0945989	22.6331	0.803	XXX	FALSE
Ssa_1747	up	4	508	9657	1442989	0.588254	1.177	0.319293	3.03216	1	XXX	FALSE
Ssa_1389	up	7	678	9654	1442819	0.23311	1.543	0.617826	3.19792	0.801	XXX	FALSE
Ssa_1513	up	0	6	9661	1443491	1	0	0	127.31	1	XXX	FALSE
Ssa_1608	up	1	180	9660	1443317	1	0.83	0.0208986	4.68472	1	XXX	FALSE
Ssa_0304	up	16	1080	9645	1442417	0.00406201	2.216	1.26129	3.6167	0.069	RIC	TRUE
Ssa_1184	up	10	794	9651	1442703	0.0502037	1.883	0.899035	3.48212	0.355	XXX	FALSE
Ssa_1800	up	0	132	9661	1443365	1	0	0	4.23485	1	XXX	FALSE
Ssa_0543	up	5	425	9656	1443072	0.217724	1.758	0.56783	4.13674	0.772	RLX	FALSE
Ssa_0718	up	1	278	9660	1443219	1	0.537	0.0135592	3.01976	1	DTA	FALSE
Ssa_0027	up	2	75	9659	1443422	0.093333	3.985	0.473854	14.9123	0.505	DTX	FALSE
Ssa_0610	up	21	944	9640	1442553	3.57459e-06	3.329	2.04992	5.12136	0	RLX	TRUE
Ssa_1996	up	0	29	9661	1443468	1	0	0	20.2723	1	XXX	FALSE
Ssa_0691	up	0	78	9661	1443419	1	0	0	7.23555	1	DTX	FALSE
Ssa_0349	up	0	592	9661	1442905	0.038373	0	0	0.933725	0.309	RIP	FALSE
Ssa_0078	up	2	105	9659	1443392	0.159423	2.846	0.340194	10.5439	0.669	DTA	FALSE
Ssa_0929	up	2	779	9659	1442718	0.261983	0.383	0.0463561	1.39029	0.853	RLG	FALSE
Ssa_0911	up	1	217	9660	1443280	1	0.689	0.0173509	3.8774	1	RLE	FALSE
Ssa_0626	up	16	591	9645	1442906	4.84061e-06	4.05	2.29875	6.63611	0	RLX	TRUE
Ssa_0794	up	1	22	9660	1443475	0.142232	6.792	0.16456	42.0658	0.633	DTT	FALSE
Ssa_0637	up	3	550	9658	1442947	1	0.815	0.1675	2.39478	1	DTX	FALSE
Ssa_0036	up	4	357	9657	1443140	0.310812	1.674	0.453641	4.32607	0.922	DTX	FALSE
Ssa_0395	up	0	278	9661	1443219	0.272443	0	0	1.9959	0.87	RIL	FALSE
Ssa_1610	up	2	199	9659	1443298	0.386385	1.502	0.18057	5.49842	1	XXX	FALSE
Ssa_1197	up	0	129	9661	1443368	1	0	0	4.33475	1	XXX	FALSE
Ssa_1177	up	9	318	9652	1443179	0.000404	4.232	1.91674	8.13729	0.011	XXX	TRUE
Ssa_1360	up	4	203	9657	1443294	0.0504699	2.945	0.794587	7.65821	0.355	XXX	FALSE
Ssa_0172	up	9	530	9652	1442967	0.0110684	2.539	1.15409	4.8577	0.138	DTA	FALSE
Ssa_1969	up	2	182	9659	1443315	0.346044	1.642	0.197322	6.01893	0.969	XXX	FALSE
Ssa_0055	up	1	409	9660	1443088	0.534338	0.365	0.00922698	2.04695	1	DTX	FALSE
Ssa_1995	up	5	287	9656	1443210	0.0469116	2.604	0.838894	6.14952	0.344	XXX	FALSE
Ssa_0416	up	4	661	9657	1442836	1	0.904	0.24557	2.32664	1	RYD	FALSE
Ssa_1453	up	2	143	9659	1443354	0.250954	2.09	0.250647	7.69223	0.835	XXX	FALSE
Ssa_0456	up	6	1472	9655	1442025	0.262849	0.609	0.22299	1.32874	0.853	RLG	FALSE
Ssa_0396	up	4	371	9657	1443126	0.322516	1.611	0.436608	4.16144	0.935	RIL	FALSE
Ssa_0175	up	7	535	9654	1442962	0.0997411	1.956	0.782283	4.05908	0.522	DTA	FALSE
Ssa_0865	up	0	82	9661	1443415	1	0	0	6.87605	1	RIR	FALSE
Ssa_0020	up	2	379	9659	1443118	1	0.788	0.095121	2.86856	1	DTX	FALSE
Ssa_0576	up	10	359	9651	1443138	0.000222526	4.165	1.97973	7.75216	0.007	RLX	TRUE
Ssa_0770	up	1	176	9660	1443321	1	0.849	0.021371	4.79296	1	DTB	FALSE
Ssa_0755	up	1	642	9660	1442855	0.141212	0.233	0.00588379	1.30119	0.633	DTT	FALSE
Ssa_1267	up	1	158	9660	1443339	1	0.946	0.0237908	5.3465	1	XXX	FALSE
Ssa_0233	up	0	325	9661	1443172	0.286801	0	0	1.7056	0.891	DTT	FALSE
Ssa_0116	up	0	129	9661	1443368	1	0	0	4.33475	1	DTA	FALSE
Ssa_0647	up	1	133	9660	1443364	0.590937	1.123	0.0282304	6.37051	1	DTX	FALSE
Ssa_1369	up	1	35	9660	1443462	0.213482	4.269	0.105114	25.4078	0.767	XXX	FALSE
Ssa_1433	up	2	128	9659	1443369	0.214306	2.335	0.279712	8.61004	0.768	XXX	FALSE
Ssa_1354	up	1	230	9660	1443267	1	0.65	0.0163743	3.65634	1	XXX	FALSE
Ssa_1238	up	0	93	9661	1443404	1	0	0	6.04646	1	XXX	FALSE
Ssa_1423	up	6	248	9655	1443249	0.00751924	3.617	1.31418	7.9874	0.101	XXX	FALSE
Ssa_0964	up	1	235	9660	1443262	1	0.636	0.0160273	3.57739	1	XXX	FALSE
Ssa_0313	up	0	163	9661	1443334	0.632199	0	0	3.42027	1	RIL	FALSE
Ssa_0694	up	0	162	9661	1443335	0.632009	0	0	3.44163	1	DTX	FALSE
Ssa_0278	up	0	401	9661	1443096	0.122294	0	0	1.38067	0.583	DTX	FALSE
Ssa_0265	up	2	331	9659	1443166	1	0.903	0.108862	3.28803	1	DTS	FALSE
Ssa_0798	up	7	733	9654	1442764	0.35627	1.427	0.571645	2.95664	0.984	RIC	FALSE
Ssa_0907	up	2	506	9659	1442991	0.780162	0.59	0.0713043	2.14467	1	RLE	FALSE
Ssa_0059	up	0	107	9661	1443390	1	0	0	5.24224	1	DTC	FALSE
Ssa_1293	up	0	73	9661	1443424	1	0	0	7.74681	1	XXX	FALSE
Ssa_0583	up	2	317	9659	1443180	1	0.943	0.11365	3.43434	1	RLX	FALSE
Ssa_1332	up	0	101	9661	1443396	1	0	0	5.558	1	XXX	FALSE
Ssa_0574	up	18	571	9643	1442926	1.54285e-07	4.717	2.77414	7.52688	0	RLX	TRUE
Ssa_1421	up	12	832	9649	1442665	0.0159381	2.157	1.10934	3.78915	0.176	XXX	FALSE
Ssa_0728	up	0	898	9661	1442599	0.00584781	0	0	0.614777	0.084	DTA	FALSE
Ssa_0819	up	2	476	9659	1443021	0.776363	0.628	0.0757871	2.28062	1	RIC	FALSE
Ssa_0494	up	5	274	9656	1443223	0.0399398	2.727	0.878388	6.44398	0.314	RST	FALSE
Ssa_0640	up	9	559	9652	1442938	0.01507	2.407	1.0945	4.60352	0.172	DTX	FALSE
Ssa_0252	up	3	492	9658	1443005	1	0.911	0.187197	2.67889	1	DTT	FALSE
Ssa_0128	up	1	269	9660	1443228	1	0.555	0.0140112	3.12192	1	DTA	FALSE
Ssa_0379	up	1	578	9660	1442919	0.19728	0.258	0.00653403	1.44595	0.733	RIR	FALSE
Ssa_1839	up	0	236	9661	1443261	0.415421	0	0	2.35404	1	XXX	FALSE
Ssa_1679	up	8	260	9653	1443237	0.000492514	4.6	1.96469	9.20626	0.013	XXX	TRUE
Ssa_1280	up	3	174	9658	1443323	0.114911	2.577	0.526156	7.65811	0.565	XXX	FALSE
Ssa_0478	up	3	457	9658	1443040	1	0.981	0.201489	2.88532	1	RLG	FALSE
Ssa_0518	up	8	561	9653	1442936	0.0611312	2.132	0.9155	4.23106	0.392	RLX	FALSE
Ssa_0960	up	1	205	9660	1443292	1	0.729	0.0183619	4.10677	1	RLG	FALSE
Ssa_0352	up	7	627	9654	1442870	0.209854	1.669	0.667921	3.45943	0.763	RIP	FALSE
Ssa_1657	up	0	96	9661	1443401	1	0	0	5.85357	1	XXX	FALSE
Ssa_0685	up	1	314	9660	1443183	0.729026	0.476	0.0120096	2.6709	1	DTX	FALSE
Ssa_0633	up	4	399	9657	1443098	0.349071	1.498	0.406095	3.8673	0.975	DTX	FALSE
Ssa_1720	up	1	81	9660	1443416	0.421314	1.845	0.046137	10.5731	1	XXX	FALSE
Ssa_0046	up	11	1349	9650	1442148	0.500501	1.219	0.606649	2.18842	1	DTX	FALSE
Ssa_1607	up	3	174	9658	1443323	0.114911	2.577	0.526156	7.65811	0.565	XXX	FALSE
Ssa_1233	up	1	271	9660	1443226	1	0.551	0.0139082	3.09858	1	XXX	FALSE
Ssa_1686	up	0	3	9661	1443494	1	0	0	359.362	1	XXX	FALSE
Ssa_0339	up	2	211	9659	1443286	0.655687	1.416	0.170358	5.18175	1	RIJ	FALSE
Ssa_1688	up	3	404	9658	1443093	0.754937	1.11	0.227818	3.26675	1	XXX	FALSE
Ssa_1173	up	1	468	9660	1443029	0.385584	0.319	0.00806632	1.78759	1	XXX	FALSE
Ssa_1962	up	0	94	9661	1443403	1	0	0	5.98082	1	XXX	FALSE
Ssa_0174	up	0	150	9661	1443347	0.630872	0	0	3.72036	1	DTA	FALSE
Ssa_0934	up	0	129	9661	1443368	1	0	0	4.33475	1	RLG	FALSE
Ssa_1782	up	3	356	9658	1443141	0.518344	1.259	0.2584	3.71118	1	XXX	FALSE
Ssa_0210	up	0	67	9661	1443430	1	0	0	8.45931	1	DTT	FALSE
Ssa_0699	up	1	31	9660	1443466	0.192214	4.82	0.118259	28.9456	0.727	DTX	FALSE
Ssa_0013	up	4	306	9657	1443191	0.15344	1.954	0.528787	5.05517	0.657	DTD	FALSE
Ssa_0763	up	1	70	9660	1443427	0.377253	2.135	0.0532867	12.2944	1	DTT	FALSE
Ssa_0928	up	3	1120	9658	1442377	0.136334	0.4	0.0823536	1.17243	0.624	RLG	FALSE
Ssa_0860	up	1	279	9660	1443218	1	0.535	0.0135108	3.00883	1	RIR	FALSE
Ssa_0285	up	2	350	9659	1443147	1	0.854	0.102974	3.10804	1	RIC	FALSE
Ssa_0350	up	8	1155	9653	1442342	0.855787	1.035	0.445615	2.04681	1	RIP	FALSE
Ssa_1126	up	0	60	9661	1443437	1	0	0	9.47654	1	XXX	FALSE
Ssa_1206	up	6	512	9655	1442985	0.165902	1.751	0.639583	3.8401	0.682	XXX	FALSE
Ssa_0370	up	0	136	9661	1443361	1	0	0	4.10859	1	RIR	FALSE
Ssa_1919	up	2	1540	9659	1441957	0.00422612	0.194	0.0234857	0.701733	0.07	XXX	FALSE
Ssa_0850	up	1	165	9660	1443332	1	0.906	0.0227874	5.11686	1	RIN	FALSE
Ssa_0829	up	5	314	9656	1443183	0.0635549	2.38	0.767243	5.61524	0.405	RIL	FALSE
Ssa_1825	up	3	176	9658	1443321	0.117766	2.547	0.520235	7.56973	0.574	XXX	FALSE
Ssa_0570	up	2	76	9659	1443421	0.095383	3.933	0.467725	14.7093	0.507	RLX	FALSE
Ssa_0305	up	4	1201	9657	1442296	0.210059	0.497	0.135285	1.27732	0.763	RIL	FALSE
Ssa_1478	up	0	156	9661	1443341	0.631168	0	0	3.57547	1	XXX	FALSE
Ssa_1108	up	14	4329	9647	1439168	0.00353293	0.482	0.26343	0.81077	0.062	XXX	FALSE
Ssa_1258	up	7	899	9654	1442598	0.678423	1.164	0.46632	2.40813	1	XXX	FALSE
Ssa_1554	up	0	127	9661	1443370	1	0	0	4.40401	1	XXX	FALSE
Ssa_1633	up	0	319	9661	1443178	0.283788	0	0	1.73779	0.888	XXX	FALSE
Ssa_1384	up	4	467	9657	1443030	0.561621	1.28	0.347208	3.29979	1	XXX	FALSE
Ssa_1824	up	3	377	9658	1443120	0.744258	1.189	0.244062	3.50257	1	XXX	FALSE
Ssa_1555	up	3	176	9658	1443321	0.117766	2.547	0.520235	7.56973	0.574	XXX	FALSE
Ssa_0662	up	8	512	9653	1442985	0.0246627	2.336	1.00268	4.6397	0.222	DTX	FALSE
Ssa_0873	up	0	136	9661	1443361	1	0	0	4.10859	1	RIJ	FALSE
Ssa_0727	up	5	882	9656	1442615	1	0.847	0.274251	1.98458	1	DTA	FALSE
Ssa_1287	up	1	275	9660	1443222	1	0.543	0.0137066	3.05302	1	XXX	FALSE
Ssa_0153	up	9	1072	9652	1442425	0.450793	1.255	0.571948	2.39162	1	DTA	FALSE
Ssa_1990	up	3	714	9658	1442783	0.641375	0.628	0.129113	1.84235	1	XXX	FALSE
Ssa_1152	up	0	87	9661	1443410	1	0	0	6.4724	1	XXX	FALSE
Ssa_1356	up	0	121	9661	1443376	1	0	0	4.62572	1	XXX	FALSE
Ssa_0539	up	6	286	9655	1443211	0.0141923	3.136	1.14098	6.91135	0.163	RLX	FALSE
Ssa_0697	up	0	32	9661	1443465	1	0	0	18.2611	1	DTX	FALSE
Ssa_0162	up	4	322	9657	1443175	0.173704	1.856	0.50266	4.80159	0.703	DTA	FALSE
Ssa_0137	up	2	172	9659	1443325	0.321899	1.738	0.20871	6.3738	0.934	DTA	FALSE
Ssa_0345	up	2	621	9659	1442876	0.453933	0.481	0.058131	1.74564	1	RIN	FALSE
Ssa_1230	up	1	300	9660	1443197	0.728398	0.498	0.0125682	2.79655	1	XXX	FALSE
Ssa_1565	up	0	11	9661	1443486	1	0	0	59.5704	1	XXX	FALSE
Ssa_0248	up	4	1376	9657	1442121	0.0954963	0.434	0.118086	1.11439	0.507	DTT	FALSE
Ssa_0817	up	2	369	9659	1443128	1	0.81	0.09769	2.94685	1	RIC	FALSE
Ssa_1722	up	0	20	9661	1443477	1	0	0	30.278	1	XXX	FALSE
Ssa_1583	up	0	36	9661	1443461	1	0	0	16.1233	1	XXX	FALSE
Ssa_1463	up	0	39	9661	1443458	1	0	0	14.8223	1	XXX	FALSE
Ssa_0399	up	0	182	9661	1443315	0.638212	0	0	3.05928	1	RLB	FALSE
Ssa_0891	up	0	129	9661	1443368	1	0	0	4.33475	1	RLB	FALSE
Ssa_1516	up	0	95	9661	1443402	1	0	0	5.91651	1	XXX	FALSE
Ssa_0855	up	1	152	9660	1443345	1	0.983	0.024724	5.56174	1	RIP	FALSE
Ssa_0535	up	2	79	9659	1443418	0.101609	3.783	0.450251	14.1321	0.524	RLX	FALSE
Ssa_1542	up	1	93	9660	1443404	0.465832	1.607	0.040246	9.17714	1	XXX	FALSE
Ssa_1591	up	1	43	9660	1443454	0.254355	3.475	0.0859963	20.4272	0.836	XXX	FALSE
Ssa_1345	up	7	426	9654	1443071	0.027278	2.456	0.981304	5.10611	0.239	XXX	FALSE
Ssa_0472	up	1	216	9660	1443281	1	0.692	0.0174309	3.89555	1	RLG	FALSE
Ssa_0930	up	1	159	9660	1443338	1	0.94	0.0236421	5.31247	1	RLG	FALSE
Ssa_0680	up	1	286	9660	1443211	1	0.522	0.0131813	2.93458	1	DTX	FALSE
Ssa_0838	up	0	160	9661	1443337	0.631671	0	0	3.48516	1	RIL	FALSE
Ssa_0542	up	0	255	9661	1443242	0.423742	0	0	2.17706	1	RLX	FALSE
Ssa_0215	up	1	115	9660	1443382	0.538746	1.299	0.0326118	7.38639	1	DTT	FALSE
Ssa_1522	up	1	100	9660	1443397	0.490202	1.494	0.0374562	8.51913	1	XXX	FALSE
Ssa_1380	up	4	1088	9657	1442409	0.345695	0.549	0.149312	1.41053	0.969	XXX	FALSE
Ssa_0428	up	2	164	9659	1443333	0.302421	1.822	0.21881	6.691	0.914	RLE	FALSE
Ssa_0836	up	2	281	9659	1443216	0.713212	1.063	0.128131	3.87884	1	RIL	FALSE
Ssa_0531	up	8	293	9653	1443204	0.00104242	4.082	1.74541	8.15505	0.024	RLX	TRUE
Ssa_1833	up	1	108	9660	1443389	0.516696	1.383	0.0347066	7.8752	1	XXX	FALSE
Ssa_1242	up	0	241	9661	1443256	0.41721	0	0	2.30474	1	XXX	FALSE
Ssa_1462	up	3	381	9658	1443116	0.745715	1.177	0.241509	3.46551	1	XXX	FALSE
Ssa_1408	up	0	74	9661	1443423	1	0	0	7.63958	1	XXX	FALSE
Ssa_0947	up	2	347	9659	1443150	1	0.861	0.103861	3.13513	1	RLG	FALSE
Ssa_0611	up	5	399	9656	1443098	0.201851	1.873	0.604649	4.40859	0.744	RLX	FALSE
Ssa_0500	up	4	642	9657	1442855	1	0.931	0.2528	2.39584	1	XXX	FALSE
Ssa_1504	up	1	175	9660	1443322	1	0.854	0.0214924	4.8207	1	XXX	FALSE
Ssa_1372	up	1	138	9660	1443359	0.604356	1.083	0.0272147	6.13519	1	XXX	FALSE
Ssa_0869	up	3	126	9658	1443371	0.0554591	3.558	0.723977	10.6443	0.371	RIR	FALSE
Ssa_1199	up	0	92	9661	1443405	1	0	0	6.11352	1	XXX	FALSE
Ssa_1388	up	7	708	9654	1442789	0.251171	1.478	0.59175	3.06165	0.835	XXX	FALSE
Ssa_0686	up	4	349	9657	1443148	0.304672	1.713	0.463985	4.4261	0.915	DTX	FALSE
Ssa_1642	up	1	68	9660	1443429	0.368889	2.197	0.0548316	12.6678	1	XXX	FALSE
Ssa_2005	up	0	282	9661	1443215	0.272769	0	0	1.96738	0.87	XXX	FALSE
Ssa_0605	up	18	527	9643	1442970	4.91207e-08	5.111	3.0044	8.16085	0	RLX	TRUE
Ssa_1488	up	0	161	9661	1443336	0.631833	0	0	3.46326	1	XXX	FALSE
Ssa_1702	up	2	542	9659	1442955	0.595298	0.551	0.0665785	2.00157	1	XXX	FALSE
Ssa_1493	up	1	254	9660	1443243	1	0.588	0.0148354	3.30769	1	XXX	FALSE
Ssa_1231	up	0	87	9661	1443410	1	0	0	6.4724	1	XXX	FALSE
Ssa_0913	up	9	892	9652	1442605	0.212748	1.508	0.687084	2.87686	0.767	RLG	FALSE
Ssa_0074	up	0	152	9661	1443345	0.630907	0	0	3.67081	1	DTH	FALSE
Ssa_1680	up	2	214	9659	1443283	0.657755	1.396	0.168044	5.10784	1	XXX	FALSE
Ssa_0557	up	4	213	9657	1443284	0.0580267	2.807	0.757612	7.29298	0.381	RLX	FALSE
Ssa_1589	up	3	126	9658	1443371	0.0554591	3.558	0.723977	10.6443	0.371	XXX	FALSE
Ssa_0894	up	0	52	9661	1443445	1	0	0	10.9879	1	RLB	FALSE
Ssa_0101	up	0	145	9661	1443352	1	0	0	3.8503	1	DTA	FALSE
Ssa_0351	up	3	704	9658	1442793	0.640105	0.637	0.130944	1.86863	1	RIP	FALSE
Ssa_0641	up	2	487	9659	1443010	0.777473	0.614	0.0740794	2.22881	1	DTX	FALSE
Ssa_1569	up	0	102	9661	1443395	1	0	0	5.50244	1	XXX	FALSE
Ssa_1191	up	2	425	9659	1443072	1	0.703	0.0848556	2.55616	1	XXX	FALSE
Ssa_0582	up	2	189	9659	1443308	0.362775	1.581	0.190062	5.79297	0.994	RLX	FALSE
Ssa_1474	up	0	116	9661	1443381	1	0	0	4.82863	1	XXX	FALSE
Ssa_1358	up	3	142	9658	1443355	0.0731772	3.157	0.643353	9.41917	0.438	XXX	FALSE
Ssa_0253	up	5	844	9656	1442653	1	0.885	0.28658	2.07434	1	DTT	FALSE
Ssa_1340	up	1	51	9660	1443446	0.293103	2.93	0.0727625	17.0714	0.905	XXX	FALSE
Ssa_1795	up	0	78	9661	1443419	1	0	0	7.23555	1	XXX	FALSE
Ssa_0809	up	1	463	9660	1443034	0.384436	0.323	0.00815323	1.80688	1	RIC	FALSE
Ssa_1270	up	29	1200	9632	1442297	1.0282e-08	3.619	2.41161	5.22769	0	XXX	TRUE
Ssa_0918	up	1	530	9660	1442967	0.277523	0.282	0.00712459	1.57748	0.875	RLG	FALSE
Ssa_0781	up	0	24	9661	1443473	1	0	0	24.8314	1	DTS	FALSE
Ssa_1156	up	2	49	9659	1443448	0.0454628	6.099	0.718399	23.2461	0.34	XXX	FALSE
Ssa_0682	up	5	293	9656	1443204	0.0503574	2.551	0.821839	6.02252	0.355	DTX	FALSE
Ssa_0599	up	1	139	9660	1443358	0.606987	1.075	0.0270203	6.09027	1	RLX	FALSE
Ssa_1128	up	0	33	9661	1443464	1	0	0	17.6777	1	XXX	FALSE
Ssa_1275	up	1	93	9660	1443404	0.465832	1.607	0.040246	9.17714	1	XXX	FALSE
Ssa_0303	up	3	622	9658	1442875	0.804543	0.721	0.14819	2.11616	1	RIC	FALSE
Ssa_0280	up	5	270	9656	1443227	0.0379299	2.768	0.891298	6.54177	0.307	DTX	FALSE
Ssa_1778	up	1	119	9660	1443378	0.550891	1.256	0.0315246	7.13333	1	XXX	FALSE
Ssa_1188	up	1	141	9660	1443356	0.612195	1.06	0.0266396	6.00239	1	XXX	FALSE
Ssa_1334	up	1	29	9660	1443468	0.181364	5.153	0.126146	31.0678	0.712	XXX	FALSE
Ssa_0868	up	0	18	9661	1443479	1	0	0	33.9887	1	RIR	FALSE
Ssa_1639	up	0	24	9661	1443473	1	0	0	24.8314	1	XXX	FALSE
Ssa_1164	up	1	103	9660	1443394	0.500303	1.451	0.0363755	8.26576	1	XXX	FALSE
Ssa_1109	up	5	428	9656	1443069	0.2198	1.746	0.563863	4.10719	0.773	XXX	FALSE
Ssa_1159	up	10	878	9651	1442619	0.0952711	1.702	0.813279	3.1475	0.507	XXX	FALSE
Ssa_1234	up	4	413	9657	1443084	0.363651	1.447	0.392423	3.73505	0.995	XXX	FALSE
Ssa_0844	up	3	539	9658	1442958	1	0.832	0.170911	2.44391	1	RIN	FALSE
Ssa_1517	up	2	144	9659	1443353	0.253407	2.075	0.248922	7.63735	0.836	XXX	FALSE
Ssa_0592	up	14	619	9647	1442878	0.000119061	3.383	1.83782	5.72188	0.004	RLX	TRUE
Ssa_0187	up	2	243	9659	1443254	0.680086	1.23	0.148086	4.49133	1	DTI	FALSE
Ssa_0638	up	0	61	9661	1443436	1	0	0	9.31645	1	DTX	FALSE
Ssa_1584	up	1	161	9660	1443336	1	0.928	0.0233502	5.24566	1	XXX	FALSE
Ssa_1445	up	0	101	9661	1443396	1	0	0	5.558	1	XXX	FALSE
Ssa_1314	up	1	190	9660	1443307	1	0.786	0.0198042	4.43551	1	XXX	FALSE
Ssa_0198	up	0	191	9661	1443306	0.642445	0	0	2.91386	1	DTT	FALSE
Ssa_1515	up	7	93	9654	1443404	5.34459e-06	11.255	4.40174	24.1366	0	XXX	TRUE
Ssa_1498	up	5	285	9656	1443212	0.0457951	2.622	0.844752	6.19317	0.34	XXX	FALSE
Ssa_0484	up	0	164	9661	1443333	0.632403	0	0	3.39917	1	RST	FALSE
Ssa_1540	up	0	137	9661	1443360	1	0	0	4.07819	1	XXX	FALSE
Ssa_1564	up	0	92	9661	1443405	1	0	0	6.11352	1	XXX	FALSE
Ssa_1441	up	4	346	9657	1443151	0.30248	1.728	0.467998	4.4648	0.914	XXX	FALSE
Ssa_1707	up	1	103	9660	1443394	0.500303	1.451	0.0363755	8.26576	1	XXX	FALSE
Ssa_0031	up	0	79	9661	1443418	1	0	0	7.14333	1	DTX	FALSE
Ssa_1361	up	2	215	9659	1443282	0.658457	1.39	0.167267	5.08384	1	XXX	FALSE
Ssa_0260	up	3	497	9658	1443000	1	0.902	0.185319	2.65177	1	DTB	FALSE
Ssa_1726	up	1	95	9660	1443402	0.472912	1.573	0.0394074	8.97904	1	XXX	FALSE
Ssa_0932	up	1	94	9660	1443403	0.469384	1.59	0.0398223	9.07711	1	RLG	FALSE
Ssa_1366	up	0	111	9661	1443386	1	0	0	5.04996	1	XXX	FALSE
Ssa_1281	up	1	40	9660	1443457	0.239283	3.736	0.0922909	22.0396	0.816	XXX	FALSE
Ssa_0021	up	5	463	9656	1443034	0.247303	1.614	0.521439	3.79478	0.829	DTX	FALSE
Ssa_1828	up	2	112	9659	1443385	0.17587	2.668	0.319186	9.87164	0.703	XXX	FALSE
Ssa_1854	up	0	1	9661	1443496	1	0	0	5340.97	1	XXX	FALSE
Ssa_1655	up	6	357	9655	1443140	0.0359348	2.512	0.915509	5.52334	0.297	XXX	FALSE
Ssa_0438	up	1	173	9660	1443324	1	0.864	0.0217395	4.87717	1	RLG	FALSE
Ssa_1499	up	1	329	9660	1443168	0.730882	0.454	0.0114637	2.54821	1	XXX	FALSE
Ssa_0086	up	4	203	9657	1443294	0.0504699	2.945	0.794587	7.65821	0.355	DTA	FALSE
Ssa_1703	up	0	24	9661	1443473	1	0	0	24.8314	1	XXX	FALSE
Ssa_1987	up	2	233	9659	1443264	0.671976	1.283	0.154411	4.68645	1	XXX	FALSE
Ssa_1797	up	2	229	9659	1443268	0.66884	1.305	0.157094	4.76933	1	XXX	FALSE
Ssa_0898	up	9	699	9652	1442798	0.0588775	1.925	0.876122	3.67624	0.382	RLC	FALSE
Ssa_0193	up	0	171	9661	1443326	0.634198	0	0	3.25849	1	DTT	FALSE
Ssa_1264	up	0	92	9661	1443405	1	0	0	6.11352	1	XXX	FALSE
Ssa_1207	up	3	125	9658	1443372	0.0544285	3.587	0.72972	10.732	0.371	XXX	FALSE
Ssa_1253	up	0	70	9661	1443427	1	0	0	8.08739	1	XXX	FALSE
Ssa_1529	up	2	113	9659	1443384	0.178241	2.645	0.316395	9.78192	0.706	XXX	FALSE
Ssa_0034	up	2	181	9659	1443316	0.343641	1.651	0.198405	6.05264	0.969	DTX	FALSE
Ssa_0624	up	7	499	9654	1442998	0.0546692	2.097	0.838444	4.35403	0.371	RLX	FALSE
Ssa_0620	up	8	958	9653	1442539	0.547072	1.248	0.537058	2.46981	1	RLX	FALSE
Ssa_0336	up	0	119	9661	1443378	1	0	0	4.70467	1	RIJ	FALSE
Ssa_0244	up	0	148	9661	1443349	1	0	0	3.77127	1	DTT	FALSE
Ssa_1171	up	0	14	9661	1443483	1	0	0	45.0775	1	XXX	FALSE
Ssa_1291	up	0	53	9661	1443444	1	0	0	10.773	1	XXX	FALSE
Ssa_0752	up	1	162	9660	1443335	1	0.922	0.0232069	5.21286	1	DTT	FALSE
Ssa_1613	up	2	106	9659	1443391	0.161755	2.819	0.337025	10.4411	0.672	XXX	FALSE
Ssa_1808	up	0	70	9661	1443427	1	0	0	8.08739	1	XXX	FALSE
Ssa_0856	up	1	12	9660	1443485	0.083063	12.452	0.29127	84.2002	0.468	RIP	FALSE
Ssa_0388	up	0	105	9661	1443392	1	0	0	5.344	1	RIL	FALSE
Ssa_0309	up	1	89	9660	1443408	0.451387	1.679	0.0420351	9.60031	1	RIL	FALSE
Ssa_1842	up	3	202	9658	1443295	0.157091	2.219	0.453811	6.58139	0.664	XXX	FALSE
Ssa_0787	up	16	2162	9645	1441335	0.690568	1.106	0.630755	1.80104	1	DTT	FALSE
Ssa_1585	up	2	118	9659	1443379	0.190167	2.533	0.30314	9.35695	0.727	XXX	FALSE
Ssa_1631	up	2	288	9659	1443209	0.719527	1.038	0.125035	3.7834	1	XXX	FALSE
Ssa_1254	up	1	198	9660	1443299	1	0.755	0.0190079	4.25447	1	XXX	FALSE
Ssa_0311	up	1	167	9660	1443330	1	0.895	0.0225161	5.05477	1	RIL	FALSE
Ssa_1393	up	5	280	9656	1443217	0.0430738	2.669	0.859704	6.30497	0.329	XXX	FALSE
Ssa_0476	up	0	88	9661	1443409	1	0	0	6.3973	1	RLG	FALSE
Ssa_1391	up	5	123	9656	1443374	0.00174592	6.076	1.93821	14.5695	0.036	XXX	TRUE
Ssa_0705	up	0	97	9661	1443400	1	0	0	5.79196	1	RYD	FALSE
Ssa_0322	up	0	81	9661	1443416	1	0	0	6.96289	1	RIL	FALSE
Ssa_1961	up	0	18	9661	1443479	1	0	0	33.9887	1	XXX	FALSE
Ssa_1538	up	1	72	9660	1443425	0.385507	2.075	0.0518264	11.9425	1	XXX	FALSE
Ssa_1455	up	1	118	9660	1443379	0.547885	1.266	0.0317895	7.19496	1	XXX	FALSE
Ssa_0871	up	0	139	9661	1443358	1	0	0	4.01873	1	RIR	FALSE
Ssa_0541	up	3	332	9658	1443165	0.491778	1.35	0.276993	3.98156	1	RLX	FALSE
Ssa_1566	up	1	56	9660	1443441	0.316292	2.668	0.0663782	15.4963	0.929	XXX	FALSE
Ssa_1676	up	1	149	9660	1443348	1	1.003	0.0252186	5.67498	1	XXX	FALSE
Ssa_1601	up	0	26	9661	1443471	1	0	0	22.7813	1	XXX	FALSE
Ssa_1768	up	4	152	9657	1443345	0.0209123	3.933	1.05789	10.2824	0.197	XXX	FALSE
Ssa_1973	up	4	510	9657	1442987	0.589673	1.172	0.318046	3.02018	1	XXX	FALSE
Ssa_0161	up	2	264	9659	1443233	0.698069	1.132	0.136332	4.13079	1	DTA	FALSE
Ssa_1289	up	8	319	9653	1443178	0.00175403	3.749	1.60434	7.48063	0.036	XXX	TRUE
Ssa_0978	up	4	373	9657	1443124	0.32428	1.603	0.434279	4.13893	0.937	XXX	FALSE
Ssa_1245	up	0	190	9661	1443307	0.641937	0	0	2.92934	1	XXX	FALSE
Ssa_1525	up	0	77	9661	1443420	1	0	0	7.33168	1	XXX	FALSE
Ssa_1396	up	6	1057	9655	1442440	0.850498	0.848	0.310452	1.8527	1	XXX	FALSE
Ssa_0082	up	6	233	9655	1443264	0.00564834	3.849	1.39796	8.50674	0.083	DTA	TRUE
Ssa_0644	up	1	167	9660	1443330	1	0.895	0.0225161	5.05477	1	DTX	FALSE
Ssa_0462	up	0	395	9661	1443102	0.122062	0	0	1.40185	0.583	RLG	FALSE
Ssa_1268	up	0	20	9661	1443477	1	0	0	30.278	1	XXX	FALSE
Ssa_1218	up	2	118	9659	1443379	0.190167	2.533	0.30314	9.35695	0.727	XXX	FALSE
Ssa_0656	up	0	239	9661	1443258	0.416458	0	0	2.32421	1	DTX	FALSE
Ssa_1521	up	0	71	9661	1443426	1	0	0	7.97058	1	XXX	FALSE
Ssa_0067	up	7	316	9654	1443181	0.00637505	3.311	1.32023	6.9068	0.089	DTC	TRUE
Ssa_0969	up	5	102	9656	1443395	0.000786576	7.328	2.32909	17.6715	0.019	XXX	TRUE
Ssa_0115	up	2	152	9659	1443345	0.273037	1.966	0.235935	7.22767	0.87	DTA	FALSE
Ssa_1992	up	9	553	9652	1442944	0.0141661	2.433	1.10632	4.65483	0.163	XXX	FALSE
Ssa_1799	up	1	157	9660	1443340	1	0.952	0.0239415	5.38096	1	XXX	FALSE
Ssa_1259	up	0	594	9661	1442903	0.0384868	0	0	0.930569	0.309	XXX	FALSE
Ssa_1211	up	1	176	9660	1443321	1	0.849	0.021371	4.79296	1	XXX	FALSE
Ssa_1308	up	0	20	9661	1443477	1	0	0	30.278	1	XXX	FALSE
Ssa_1223	up	0	83	9661	1443414	1	0	0	6.79134	1	XXX	FALSE
Ssa_0648	up	1	163	9660	1443334	1	0.917	0.0230654	5.18047	1	DTX	FALSE
Ssa_1489	up	1	73	9660	1443424	0.389592	2.047	0.0511259	11.774	1	XXX	FALSE
Ssa_0377	up	3	187	9658	1443310	0.133925	2.398	0.489901	7.11772	0.616	RIR	FALSE
Ssa_0565	up	5	152	9656	1443345	0.00420326	4.916	1.57358	11.735	0.07	RLX	TRUE
Ssa_0671	up	1	81	9660	1443416	0.421314	1.845	0.046137	10.5731	1	DTX	FALSE
Ssa_0976	up	2	458	9659	1443039	0.775316	0.652	0.0787578	2.37078	1	XXX	FALSE
Ssa_0769	up	4	863	9657	1442634	0.672673	0.692	0.188199	1.77987	1	DTB	FALSE
Ssa_0156	up	3	159	9658	1443338	0.0943798	2.82	0.575291	8.39547	0.507	DTA	FALSE
Ssa_0366	up	2	299	9659	1443198	1	0.999	0.12046	3.64267	1	RIR	FALSE
Ssa_0609	up	3	515	9658	1442982	1	0.87	0.178858	2.55848	1	RLX	FALSE
Ssa_0235	up	1	136	9660	1443361	0.599042	1.099	0.0276121	6.22708	1	DTT	FALSE
Ssa_0330	up	2	452	9659	1443045	0.775192	0.661	0.0798005	2.4025	1	RIL	FALSE
Ssa_0185	up	0	391	9661	1443106	0.195459	0	0	1.41626	0.732	DTA	FALSE
Ssa_0401	up	0	421	9661	1443076	0.124634	0	0	1.31478	0.586	RLB	FALSE
Ssa_0604	up	13	480	9648	1443017	3.60503e-05	4.051	2.14042	6.9973	0.001	RLX	TRUE
Ssa_0883	up	0	60	9661	1443437	1	0	0	9.47654	1	RIL	FALSE
Ssa_0842	up	1	352	9660	1443145	0.735809	0.424	0.0107168	2.38066	1	RIN	FALSE
Ssa_0875	up	3	182	9658	1443315	0.126487	2.463	0.503239	7.31637	0.589	RIR	FALSE
Ssa_1503	up	0	326	9661	1443171	0.287333	0	0	1.70033	0.891	XXX	FALSE
Ssa_0678	up	0	157	9661	1443340	0.631271	0	0	3.55256	1	DTX	FALSE
Ssa_1793	up	2	182	9659	1443315	0.346044	1.642	0.197322	6.01893	0.969	XXX	FALSE
Ssa_0555	up	7	300	9654	1443197	0.00487195	3.488	1.39008	7.27879	0.076	RLX	TRUE
Ssa_1592	up	2	96	9659	1443401	0.138743	3.113	0.371641	11.5592	0.626	XXX	FALSE
Ssa_1167	up	3	353	9658	1443144	0.514939	1.27	0.260587	3.74273	1	XXX	FALSE
Ssa_0966	up	2	51	9659	1443446	0.0487131	5.86	0.690958	22.2877	0.353	XXX	FALSE
Ssa_1556	up	2	173	9659	1443324	0.324324	1.727	0.207512	6.33606	0.937	XXX	FALSE
Ssa_1300	up	0	81	9661	1443416	1	0	0	6.96289	1	XXX	FALSE
Ssa_1229	up	3	284	9658	1443213	0.445767	1.578	0.323554	4.66165	1	XXX	FALSE
Ssa_1758	up	0	10	9661	1443487	1	0	0	66.6642	1	XXX	FALSE
Ssa_0586	up	5	393	9656	1443104	0.198765	1.901	0.613833	4.47643	0.736	RLX	FALSE
Ssa_1456	up	8	544	9653	1442953	0.0333248	2.198	0.943998	4.36414	0.278	XXX	FALSE
Ssa_1818	up	1	75	9660	1443422	0.397682	1.992	0.0497802	11.451	1	XXX	FALSE
Ssa_0335	up	0	259	9661	1443238	0.425989	0	0	2.14334	1	RIJ	FALSE
Ssa_0098	up	0	227	9661	1443270	0.41299	0	0	2.44799	1	DTA	FALSE
Ssa_1436	up	1	224	9660	1443273	1	0.667	0.016811	3.75531	1	XXX	FALSE
Ssa_0563	up	1	207	9660	1443290	1	0.722	0.0181853	4.06671	1	RLX	FALSE
Ssa_1193	up	1	74	9660	1443423	0.39365	2.019	0.0504441	11.6103	1	XXX	FALSE
Ssa_0455	up	0	164	9661	1443333	0.632403	0	0	3.39917	1	RLG	FALSE
Ssa_0301	up	3	405	9658	1443092	0.755367	1.107	0.227259	3.25862	1	RIC	FALSE
Ssa_0562	up	0	203	9661	1443294	0.649215	0	0	2.74008	1	RLX	FALSE
Ssa_0453	up	3	166	9658	1443331	0.103761	2.701	0.551288	8.03442	0.532	RLG	FALSE
Ssa_0282	up	0	120	9661	1443377	1	0	0	4.66486	1	DTX	FALSE
Ssa_1252	up	1	116	9660	1443381	0.541813	1.288	0.032333	7.32146	1	XXX	FALSE
Ssa_0132	up	3	377	9658	1443120	0.744258	1.189	0.244062	3.50257	1	DTA	FALSE
Ssa_1572	up	0	80	9661	1443417	1	0	0	7.05196	1	XXX	FALSE
Ssa_1454	up	0	271	9661	1443226	0.43365	0	0	2.04787	1	XXX	FALSE
Ssa_0713	up	3	385	9658	1443112	0.747218	1.164	0.239008	3.42889	1	DTA	FALSE
Ssa_1781	up	1	511	9660	1442986	0.274687	0.292	0.00738895	1.63649	0.872	XXX	FALSE
Ssa_1116	up	0	198	9661	1443299	0.646251	0	0	2.80991	1	XXX	FALSE
Ssa_1807	up	0	282	9661	1443215	0.272769	0	0	1.96738	0.87	XXX	FALSE
Ssa_1401	up	0	106	9661	1443391	1	0	0	5.29263	1	XXX	FALSE
Ssa_0973	up	0	213	9661	1443284	0.411409	0	0	2.61031	1	XXX	FALSE
Ssa_1547	up	4	312	9657	1443185	0.160932	1.916	0.518678	4.95704	0.672	XXX	FALSE
Ssa_0665	up	3	473	9658	1443024	1	0.948	0.194694	2.78719	1	DTX	FALSE
Ssa_1682	up	1	113	9660	1443384	0.532551	1.322	0.0331841	7.51976	1	XXX	FALSE
Ssa_0245	up	5	438	9656	1443059	0.227058	1.706	0.551062	4.01311	0.789	DTT	FALSE
Ssa_0689	up	2	249	9659	1443248	0.685111	1.2	0.144534	4.38191	1	DTX	FALSE
Ssa_0004	up	2	72	9659	1443425	0.0872629	4.151	0.49322	15.5517	0.487	DYC	FALSE
Ssa_0523	up	1	124	9660	1443373	0.565624	1.205	0.0302633	6.84037	1	RLX	FALSE
Ssa_0777	up	5	147	9656	1443350	0.00366543	5.084	1.6263	12.14	0.063	DMM	TRUE
Ssa_0192	up	0	116	9661	1443381	1	0	0	4.82863	1	DTT	FALSE
Ssa_1690	up	0	103	9661	1443394	1	0	0	5.44798	1	XXX	FALSE
Ssa_0567	up	6	549	9655	1442948	0.192451	1.633	0.596672	3.57926	0.727	RLX	FALSE
Ssa_0045	up	2	941	9659	1442556	0.104494	0.317	0.0383815	1.15016	0.533	DTX	FALSE
Ssa_0927	up	0	224	9661	1443273	0.412418	0	0	2.48106	1	RLG	FALSE
Ssa_1819	up	0	11	9661	1443486	1	0	0	59.5704	1	XXX	FALSE
Ssa_0952	up	1	119	9660	1443378	0.550891	1.256	0.0315246	7.13333	1	RLG	FALSE
Ssa_1168	up	0	41	9661	1443456	1	0	0	14.0654	1	XXX	FALSE
Ssa_0693	up	1	182	9660	1443315	1	0.821	0.0206702	4.63346	1	DTX	FALSE
Ssa_1582	up	0	69	9661	1443428	1	0	0	8.20767	1	XXX	FALSE
Ssa_0378	up	0	805	9661	1442692	0.00808261	0	0	0.686006	0.108	RIR	FALSE
Ssa_0039	up	4	175	9657	1443322	0.0323866	3.416	0.920349	8.90701	0.273	DTX	FALSE
Ssa_0516	up	5	155	9656	1443342	0.00455169	4.822	1.54355	11.5004	0.073	RLX	TRUE
Ssa_0649	up	0	47	9661	1443450	1	0	0	12.2054	1	DTX	FALSE
Ssa_0491	up	1	244	9660	1443253	1	0.612	0.0154384	3.44451	1	RST	FALSE
Ssa_0160	up	4	384	9657	1443113	0.334368	1.557	0.421896	4.01907	0.956	DTA	FALSE
Ssa_1427	up	4	384	9657	1443113	0.334368	1.557	0.421896	4.01907	0.956	XXX	FALSE
Ssa_0372	up	4	369	9657	1443128	0.320773	1.62	0.438968	4.18419	0.933	RIT	FALSE
Ssa_0319	up	1	530	9660	1442967	0.277523	0.282	0.00712459	1.57748	0.875	RIL	FALSE
Ssa_0277	up	4	150	9657	1443347	0.0200552	3.986	1.07182	10.4222	0.197	DTT	FALSE
Ssa_1876	up	1	89	9660	1443408	0.451387	1.679	0.0420351	9.60031	1	XXX	FALSE
Ssa_0075	up	1	56	9660	1443441	0.316292	2.668	0.0663782	15.4963	0.929	DTH	FALSE
Ssa_0688	up	3	99	9658	1443398	0.031014	4.528	0.918141	13.6263	0.266	DTX	FALSE
Ssa_0284	up	4	322	9657	1443175	0.173704	1.856	0.50266	4.80159	0.703	RIC	FALSE
Ssa_1486	up	2	123	9659	1443374	0.202196	2.43	0.290958	8.96627	0.744	XXX	FALSE
Ssa_1118	up	0	78	9661	1443419	1	0	0	7.23555	1	XXX	FALSE
Ssa_0149	up	2	257	9659	1443240	0.691961	1.163	0.140053	4.24446	1	DTA	FALSE
Ssa_0546	up	1	69	9660	1443428	0.373085	2.166	0.0540481	12.4783	1	RLX	FALSE
Ssa_0530	up	2	194	9659	1443303	0.374626	1.54	0.185195	5.64132	1	RLX	FALSE
Ssa_0347	up	2	282	9659	1443215	0.714113	1.06	0.127679	3.86463	1	RIN	FALSE
Ssa_0975	up	3	285	9658	1443212	0.446589	1.573	0.322425	4.64512	1	XXX	FALSE
Ssa_1304	up	0	85	9661	1443412	1	0	0	6.62804	1	XXX	FALSE
Ssa_0327	up	2	303	9659	1443194	1	0.986	0.118879	3.59429	1	RIL	FALSE
Ssa_0288	up	3	224	9658	1443273	0.193032	2.001	0.409577	5.9264	0.727	RIC	FALSE
Ssa_1407	up	3	250	9658	1443247	0.237749	1.793	0.367261	5.30266	0.812	XXX	FALSE
Ssa_0959	up	0	775	9661	1442722	0.0123026	0	0	0.712632	0.15	RLG	FALSE
Ssa_0753	up	2	139	9659	1443358	0.241151	2.15	0.25779	7.9163	0.816	DTT	FALSE
Ssa_1247	up	5	436	9656	1443061	0.225566	1.714	0.55359	4.03173	0.787	XXX	FALSE
Ssa_1226	up	2	181	9659	1443316	0.343641	1.651	0.198405	6.05264	0.969	XXX	FALSE
Ssa_1925	up	1	75	9660	1443422	0.397682	1.992	0.0497802	11.451	1	XXX	FALSE
Ssa_0326	up	0	230	9661	1443267	0.413684	0	0	2.41579	1	RIL	FALSE
Ssa_1581	up	0	105	9661	1443392	1	0	0	5.344	1	XXX	FALSE
Ssa_0061	up	1	176	9660	1443321	1	0.849	0.021371	4.79296	1	DTC	FALSE
Ssa_1192	up	0	156	9661	1443341	0.631168	0	0	3.57547	1	XXX	FALSE
Ssa_0601	up	16	1012	9645	1442485	0.00287619	2.364	1.34577	3.86115	0.053	RLX	TRUE
Ssa_1440	up	0	66	9661	1443431	1	0	0	8.59102	1	XXX	FALSE
Ssa_1204	up	1	52	9660	1443445	0.297803	2.873	0.0713892	16.7278	0.908	XXX	FALSE
Ssa_0765	up	0	46	9661	1443451	1	0	0	12.4821	1	DTT	FALSE
Ssa_1571	up	0	80	9661	1443417	1	0	0	7.05196	1	XXX	FALSE
Ssa_1635	up	2	98	9659	1443399	0.143287	3.05	0.36416	11.3171	0.635	XXX	FALSE
Ssa_0730	up	0	90	9661	1443407	1	0	0	6.25219	1	DTA	FALSE
Ssa_1594	up	3	242	9658	1443255	0.223786	1.853	0.379319	5.48029	0.783	XXX	FALSE
Ssa_1662	up	2	204	9659	1443293	0.398046	1.465	0.17617	5.36156	1	XXX	FALSE
Ssa_1853	up	0	19	9661	1443478	1	0	0	32.0068	1	XXX	FALSE
Ssa_0879	up	0	245	9661	1443252	0.418854	0	0	2.26678	1	RIR	FALSE
Ssa_0834	up	5	327	9656	1443170	0.0726071	2.285	0.736937	5.38909	0.438	RIL	FALSE
Ssa_1532	up	2	47	9659	1443450	0.0422967	6.359	0.748107	24.2954	0.328	XXX	FALSE
Ssa_0677	up	0	124	9661	1443373	1	0	0	4.51215	1	DTX	FALSE
Ssa_1322	up	4	43	9657	1443454	0.000277207	13.909	3.62415	38.2678	0.008	XXX	TRUE
Ssa_0645	up	0	66	9661	1443431	1	0	0	8.59102	1	DTX	FALSE
Ssa_0096	up	3	245	9658	1443252	0.229003	1.83	0.374706	5.41235	0.795	DTA	FALSE
Ssa_1442	up	1	174	9660	1443323	1	0.859	0.0216153	4.84877	1	XXX	FALSE
Ssa_1459	up	2	211	9659	1443286	0.655687	1.416	0.170358	5.18175	1	XXX	FALSE
Ssa_0652	up	0	78	9661	1443419	1	0	0	7.23555	1	DTX	FALSE
Ssa_0223	up	0	402	9661	1443095	0.122355	0	0	1.37722	0.583	DTT	FALSE
Ssa_0822	up	0	99	9661	1443398	1	0	0	5.67256	1	RIL	FALSE
Ssa_0732	up	0	101	9661	1443396	1	0	0	5.558	1	DTA	FALSE
Ssa_0823	up	2	265	9659	1443232	0.698949	1.128	0.135821	4.11505	1	RIL	FALSE
Ssa_0066	up	1	225	9660	1443272	1	0.664	0.0167366	3.73844	1	DTC	FALSE
Ssa_0205	up	0	124	9661	1443373	1	0	0	4.51215	1	DTT	FALSE
Ssa_0550	up	1	84	9660	1443413	0.432779	1.779	0.0445083	10.1858	1	RLX	FALSE
Ssa_1176	up	1	620	9660	1442877	0.205624	0.241	0.00609219	1.34759	0.754	XXX	FALSE
Ssa_1838	up	1	106	9660	1443391	0.510204	1.41	0.0353554	8.02693	1	XXX	FALSE
Ssa_1378	up	1	799	9660	1442698	0.0748509	0.187	0.00472934	1.04467	0.444	XXX	FALSE
Ssa_0979	up	2	130	9659	1443367	0.219169	2.299	0.275453	8.47512	0.773	XXX	FALSE
Ssa_1737	up	0	28	9661	1443469	1	0	0	21.0398	1	XXX	FALSE
Ssa_0032	up	1	65	9660	1443432	0.356132	2.299	0.0573245	13.2727	0.984	DTX	FALSE
Ssa_1127	up	4	531	9657	1442966	0.785473	1.126	0.305526	2.90001	1	XXX	FALSE
Ssa_0904	up	5	857	9656	1442640	1	0.872	0.282241	2.04284	1	RLE	FALSE
Ssa_0796	up	3	141	9658	1443356	0.0720039	3.18	0.647862	9.48714	0.437	RIJ	FALSE
Ssa_0373	up	7	1558	9654	1441939	0.350883	0.671	0.269292	1.38654	0.978	RIR	FALSE
Ssa_0023	up	5	470	9656	1443027	0.253461	1.59	0.513708	3.73793	0.836	DTX	FALSE
Ssa_0203	up	1	323	9660	1443174	0.730001	0.463	0.011676	2.59591	1	DTT	FALSE
Ssa_0083	up	3	101	9658	1443396	0.0325775	4.439	0.900257	13.3477	0.273	DTA	FALSE
Ssa_1814	up	0	62	9661	1443435	1	0	0	9.1617	1	XXX	FALSE
Ssa_1262	up	0	87	9661	1443410	1	0	0	6.4724	1	XXX	FALSE
Ssa_0483	up	1	167	9660	1443330	1	0.895	0.0225161	5.05477	1	RST	FALSE
Ssa_0164	up	5	341	9656	1443156	0.0830991	2.191	0.706866	5.16563	0.468	DTA	FALSE
Ssa_0155	up	1	50	9660	1443447	0.288372	2.988	0.0741896	17.4294	0.893	DTA	FALSE
Ssa_0092	up	4	446	9657	1443051	0.550252	1.34	0.363489	3.45665	1	DTA	FALSE
Ssa_1298	up	1	113	9660	1443384	0.532551	1.322	0.0331841	7.51976	1	XXX	FALSE
Ssa_0816	up	0	50	9661	1443447	1	0	0	11.4445	1	RIC	FALSE
Ssa_1611	up	1	15	9660	1443482	0.10123	9.962	0.236614	64.7893	0.524	XXX	FALSE
Ssa_0954	up	1	41	9660	1443456	0.24434	3.645	0.0900927	21.4767	0.822	RLG	FALSE
Ssa_0150	up	1	149	9660	1443348	1	1.003	0.0252186	5.67498	1	DTA	FALSE
Ssa_1250	up	1	393	9660	1443104	0.530525	0.38	0.00960166	2.13092	1	XXX	FALSE
Ssa_0158	up	2	147	9659	1443350	0.260768	2.033	0.243888	7.47792	0.851	DTA	FALSE
Ssa_1603	up	0	130	9661	1443367	1	0	0	4.30093	1	XXX	FALSE
Ssa_1706	up	1	84	9660	1443413	0.432779	1.779	0.0445083	10.1858	1	XXX	FALSE
Ssa_0068	up	2	309	9659	1443188	1	0.967	0.11658	3.52399	1	DTC	FALSE
Ssa_1624	up	2	94	9659	1443403	0.134232	3.179	0.379435	11.8126	0.616	XXX	FALSE
Ssa_0899	up	4	386	9657	1443111	0.336268	1.549	0.419719	3.99793	0.959	RLC	FALSE
Ssa_0049	up	1	354	9660	1443143	0.736344	0.422	0.0106564	2.36712	1	DTX	FALSE
Ssa_1896	up	1	14	9660	1443483	0.0952147	10.676	0.252401	70.3017	0.507	XXX	FALSE
Ssa_0683	up	1	175	9660	1443322	1	0.854	0.0214924	4.8207	1	DTX	FALSE
Ssa_1671	up	0	24	9661	1443473	1	0	0	24.8314	1	XXX	FALSE
Ssa_1926	up	2	143	9659	1443354	0.250954	2.09	0.250647	7.69223	0.835	XXX	FALSE
Ssa_0880	up	1	125	9660	1443372	0.568512	1.195	0.0300231	6.78464	1	RIL	FALSE
Ssa_1802	up	1	227	9660	1443270	1	0.658	0.0165898	3.70516	1	XXX	FALSE
Ssa_0242	up	1	208	9660	1443289	1	0.718	0.0180983	4.04696	1	DTT	FALSE
Ssa_0325	up	4	301	9657	1443196	0.1473	1.986	0.537517	5.13994	0.641	RIL	FALSE
Ssa_1477	up	0	90	9661	1443407	1	0	0	6.25219	1	XXX	FALSE
Ssa_0628	up	6	528	9655	1442969	0.176762	1.698	0.620286	3.72307	0.703	RLX	FALSE
Ssa_1696	up	0	37	9661	1443460	1	0	0	15.6651	1	XXX	FALSE
Ssa_1328	up	3	82	9658	1443415	0.0193705	5.469	1.10464	16.5497	0.196	XXX	FALSE
Ssa_0828	up	2	242	9659	1443255	0.67926	1.235	0.148695	4.51011	1	RIL	FALSE
Ssa_0127	up	1	161	9660	1443336	1	0.928	0.0233502	5.24566	1	DTA	FALSE
Ssa_1346	up	3	138	9658	1443359	0.0685356	3.249	0.661777	9.69794	0.428	XXX	FALSE
Ssa_0622	up	10	453	9651	1443044	0.00126664	3.301	1.57155	6.12936	0.028	RLX	TRUE
Ssa_0760	up	3	450	9658	1443047	1	0.996	0.204613	2.93042	1	DTT	FALSE
Ssa_1855	up	0	6	9661	1443491	1	0	0	127.31	1	XXX	FALSE
Ssa_1634	up	0	70	9661	1443427	1	0	0	8.08739	1	XXX	FALSE
Ssa_0847	up	1	149	9660	1443348	1	1.003	0.0252186	5.67498	1	RIN	FALSE
Ssa_1271	up	2	69	9659	1443428	0.0813177	4.332	0.514241	16.2533	0.464	XXX	FALSE
Ssa_1435	up	4	264	9657	1443233	0.105128	2.264	0.612315	5.86852	0.533	XXX	FALSE
Ssa_2001	up	1	54	9660	1443443	0.307109	2.767	0.0687926	16.0964	0.919	XXX	FALSE
Ssa_1157	up	1	141	9660	1443356	0.612195	1.06	0.0266396	6.00239	1	XXX	FALSE
Ssa_1196	up	0	102	9661	1443395	1	0	0	5.50244	1	XXX	FALSE
Ssa_1327	up	3	202	9658	1443295	0.157091	2.219	0.453811	6.58139	0.664	XXX	FALSE
Ssa_1579	up	2	118	9659	1443379	0.190167	2.533	0.30314	9.35695	0.727	XXX	FALSE
Ssa_1719	up	0	148	9661	1443349	1	0	0	3.77127	1	XXX	FALSE
Ssa_0716	up	1	149	9660	1443348	1	1.003	0.0252186	5.67498	1	DTA	FALSE
Ssa_0199	up	1	511	9660	1442986	0.274687	0.292	0.00738895	1.63649	0.872	DTT	FALSE
Ssa_0142	up	1	160	9660	1443337	1	0.934	0.0234953	5.27886	1	DTA	FALSE
Ssa_0148	up	1	110	9660	1443387	0.523101	1.358	0.0340811	7.72908	1	DTA	FALSE
Ssa_1580	up	0	61	9661	1443436	1	0	0	9.31645	1	XXX	FALSE
Ssa_1519	up	1	98	9660	1443399	0.483355	1.525	0.038213	8.69655	1	XXX	FALSE
Ssa_1209	up	0	103	9661	1443394	1	0	0	5.44798	1	XXX	FALSE
Ssa_1476	up	2	129	9659	1443368	0.216737	2.317	0.277566	8.54206	0.771	XXX	FALSE
Ssa_1788	up	1	24	9660	1443473	0.1536	6.226	0.151389	38.1879	0.657	XXX	FALSE
Ssa_1302	up	1	41	9660	1443456	0.24434	3.645	0.0900927	21.4767	0.822	XXX	FALSE
Ssa_1424	up	2	157	9659	1443340	0.285297	1.904	0.228485	6.994	0.891	XXX	FALSE
Ssa_1640	up	1	128	9660	1443369	0.577062	1.167	0.0293248	6.62218	1	XXX	FALSE
Ssa_0841	up	1	84	9660	1443413	0.432779	1.779	0.0445083	10.1858	1	RIJ	FALSE
Ssa_0006	up	0	159	9661	1443338	0.631523	0	0	3.50734	1	DYC	FALSE
Ssa_1593	up	0	63	9661	1443434	1	0	0	9.01202	1	XXX	FALSE
Ssa_0864	up	1	19	9660	1443478	0.124894	7.865	0.18926	49.5036	0.586	RIR	FALSE
Ssa_1426	up	4	294	9657	1443203	0.13887	2.033	0.550261	5.2634	0.626	XXX	FALSE
Ssa_0832	up	1	186	9660	1443311	1	0.803	0.0202279	4.53213	1	RIL	FALSE
Ssa_1506	up	0	68	9661	1443429	1	0	0	8.33159	1	XXX	FALSE
Ssa_0441	up	2	444	9659	1443053	1	0.673	0.0812344	2.44607	1	RLG	FALSE
Ssa_1776	up	0	24	9661	1443473	1	0	0	24.8314	1	XXX	FALSE
Ssa_0089	up	0	41	9661	1443456	1	0	0	14.0654	1	DTA	FALSE
Ssa_0384	up	3	382	9658	1443115	0.746086	1.173	0.240879	3.45637	1	RIL	FALSE
Ssa_0980	up	2	426	9659	1443071	1	0.701	0.084657	2.55012	1	XXX	FALSE
Ssa_0110	up	0	144	9661	1443353	1	0	0	3.87738	1	DTA	FALSE
Ssa_0881	up	1	41	9660	1443456	0.24434	3.645	0.0900927	21.4767	0.822	RIL	FALSE
Ssa_1548	up	2	109	9659	1443388	0.168787	2.742	0.327863	10.145	0.689	XXX	FALSE
Ssa_1576	up	0	149	9661	1443348	1	0	0	3.74564	1	XXX	FALSE
Ssa_1822	up	0	2	9661	1443495	1	0	0	802.444	1	XXX	FALSE
Ssa_1219	up	2	209	9659	1443288	0.409602	1.43	0.17198	5.23164	1	XXX	FALSE
Ssa_0780	up	3	260	9658	1443237	0.2554	1.724	0.353226	5.09679	0.838	DTS	FALSE
Ssa_0852	up	0	185	9661	1443312	0.639535	0	0	3.00924	1	RIP	FALSE
Ssa_0679	up	2	135	9659	1443362	0.231365	2.214	0.265353	8.15537	0.797	DTX	FALSE
Ssa_0785	up	4	187	9657	1443310	0.0395793	3.197	0.861884	8.32553	0.312	DTT	FALSE
Ssa_1146	up	1	178	9660	1443319	1	0.839	0.0211322	4.7384	1	XXX	FALSE
Ssa_1558	up	0	115	9661	1443382	1	0	0	4.87133	1	XXX	FALSE
Ssa_0762	up	2	43	9659	1443454	0.0362288	6.95	0.815551	26.7084	0.298	DTT	FALSE
Ssa_1468	up	1	141	9660	1443356	0.612195	1.06	0.0266396	6.00239	1	XXX	FALSE
Ssa_0948	up	0	696	9661	1442801	0.0174917	0	0	0.793788	0.185	RLG	FALSE
Ssa_0194	up	0	32	9661	1443465	1	0	0	18.2611	1	DTT	FALSE
Ssa_1295	up	0	92	9661	1443405	1	0	0	6.11352	1	XXX	FALSE
Ssa_1697	up	0	10	9661	1443487	1	0	0	66.6642	1	XXX	FALSE
Ssa_1490	up	0	10	9661	1443487	1	0	0	66.6642	1	XXX	FALSE
Ssa_0764	up	1	57	9660	1443440	0.320838	2.621	0.0652334	15.2128	0.933	DTT	FALSE
Ssa_1602	up	1	154	9660	1443343	1	0.97	0.0244049	5.48879	1	XXX	FALSE
Ssa_1341	up	2	144	9659	1443353	0.253407	2.075	0.248922	7.63735	0.836	XXX	FALSE
Ssa_0473	up	0	120	9661	1443377	1	0	0	4.66486	1	RLG	FALSE
Ssa_0578	up	4	205	9657	1443292	0.0519354	2.916	0.786906	7.5822	0.364	RLX	FALSE
Ssa_1664	up	4	249	9657	1443248	0.089851	2.401	0.648921	6.22634	0.492	XXX	FALSE
Ssa_0131	up	0	128	9661	1443369	1	0	0	4.3691	1	DTA	FALSE
Ssa_0219	up	0	18	9661	1443479	1	0	0	33.9887	1	DTT	FALSE
Ssa_0949	up	0	68	9661	1443429	1	0	0	8.33159	1	RLG	FALSE
Ssa_0566	up	5	115	9656	1443382	0.00131361	6.499	2.07054	15.6213	0.029	RLX	TRUE
Ssa_1272	up	0	32	9661	1443465	1	0	0	18.2611	1	XXX	FALSE
Ssa_0974	up	0	84	9661	1443413	1	0	0	6.7087	1	XXX	FALSE
Ssa_1355	up	2	200	9659	1443297	0.388726	1.494	0.179673	5.47045	1	XXX	FALSE
Ssa_0328	up	0	90	9661	1443407	1	0	0	6.25219	1	RIL	FALSE
Ssa_1475	up	0	18	9661	1443479	1	0	0	33.9887	1	XXX	FALSE
Ssa_1644	up	1	85	9660	1443412	0.436551	1.758	0.0439906	10.0644	1	XXX	FALSE
Ssa_0774	up	1	34	9660	1443463	0.208218	4.395	0.108118	26.2169	0.761	DTB	FALSE
Ssa_1774	up	2	225	9659	1443272	0.665774	1.328	0.159873	4.85517	1	XXX	FALSE
Ssa_0354	up	0	89	9661	1443408	1	0	0	6.32391	1	RIP	FALSE
Ssa_1357	up	1	21	9660	1443476	0.136492	7.117	0.172045	44.2488	0.624	XXX	FALSE
Ssa_0097	up	0	13	9661	1443484	1	0	0	49.0494	1	DTA	FALSE
Ssa_0200	up	2	588	9659	1442909	0.450937	0.508	0.0613869	1.8442	1	DTT	FALSE
Ssa_1333	up	0	141	9661	1443356	1	0	0	3.96097	1	XXX	FALSE
Ssa_0723	up	0	63	9661	1443434	1	0	0	9.01202	1	DTA	FALSE
Ssa_1827	up	0	62	9661	1443435	1	0	0	9.1617	1	XXX	FALSE
Ssa_1983	up	2	130	9659	1443367	0.219169	2.299	0.275453	8.47512	0.773	XXX	FALSE
Ssa_1205	up	0	87	9661	1443410	1	0	0	6.4724	1	XXX	FALSE
Ssa_0018	up	2	245	9659	1443252	0.681749	1.22	0.146883	4.45425	1	DTX	FALSE
Ssa_0317	up	2	305	9659	1443192	1	0.98	0.118103	3.57056	1	RIL	FALSE
Ssa_0206	up	0	212	9661	1443285	0.411406	0	0	2.62274	1	DTT	FALSE
Ssa_1590	up	0	94	9661	1443403	1	0	0	5.98082	1	XXX	FALSE
Ssa_1482	up	2	240	9659	1443257	0.677616	1.245	0.149929	4.54814	1	XXX	FALSE
Ssa_0340	up	0	204	9661	1443293	0.649831	0	0	2.72653	1	RIJ	FALSE
Ssa_1269	up	2	143	9659	1443354	0.250954	2.09	0.250647	7.69223	0.835	XXX	FALSE
Ssa_1772	up	0	18	9661	1443479	1	0	0	33.9887	1	XXX	FALSE
Ssa_1130	up	0	21	9661	1443476	1	0	0	28.7089	1	XXX	FALSE
Ssa_1166	up	2	76	9659	1443421	0.095383	3.933	0.467725	14.7093	0.507	XXX	FALSE
Ssa_0739	up	0	55	9661	1443442	1	0	0	10.3676	1	DTT	FALSE
Ssa_1257	up	2	225	9659	1443272	0.665774	1.328	0.159873	4.85517	1	XXX	FALSE
Ssa_1256	up	2	268	9659	1443229	0.701598	1.115	0.134309	4.06843	1	XXX	FALSE
Ssa_1918	up	0	1	9661	1443496	1	0	0	5340.97	1	XXX	FALSE
Ssa_1114	up	0	21	9661	1443476	1	0	0	28.7089	1	XXX	FALSE
Ssa_0771	up	0	21	9661	1443476	1	0	0	28.7089	1	DTB	FALSE
Ssa_0695	up	0	96	9661	1443401	1	0	0	5.85357	1	DTX	FALSE
Ssa_1683	up	0	26	9661	1443471	1	0	0	22.7813	1	XXX	FALSE
Ssa_0861	up	0	64	9661	1443433	1	0	0	8.86716	1	RIR	FALSE
Ssa_0712	up	0	85	9661	1443412	1	0	0	6.62804	1	DTA	FALSE
Ssa_1350	up	4	90	9657	1443407	0.00370321	6.643	1.77127	17.6197	0.063	XXX	TRUE
Ssa_0071	up	0	114	9661	1443383	1	0	0	4.91479	1	DTH	FALSE
Ssa_0916	up	1	85	9660	1443412	0.436551	1.758	0.0439906	10.0644	1	RLG	FALSE
Ssa_0734	up	0	285	9661	1443212	0.273133	0	0	1.94652	0.87	DTK	FALSE
Ssa_0398	up	2	539	9659	1442958	0.594993	0.554	0.0669483	2.01271	1	RLB	FALSE
Ssa_0821	up	2	144	9659	1443353	0.253407	2.075	0.248922	7.63735	0.836	RIL	FALSE
Ssa_1210	up	1	66	9660	1443431	0.360413	2.264	0.0564687	13.0647	0.991	XXX	FALSE
Ssa_1954	up	0	11	9661	1443486	1	0	0	59.5704	1	XXX	FALSE
Ssa_1560	up	0	14	9661	1443483	1	0	0	45.0775	1	XXX	FALSE
Ssa_1986	up	1	265	9660	1443232	1	0.564	0.0142219	3.16913	1	XXX	FALSE
Ssa_0386	up	4	235	9657	1443262	0.0766371	2.544	0.687263	6.60244	0.448	RIL	FALSE
Ssa_1438	up	0	147	9661	1443350	1	0	0	3.79725	1	XXX	FALSE
Ssa_0595	up	3	142	9658	1443355	0.0731772	3.157	0.643353	9.41917	0.438	RLX	FALSE
Ssa_1578	up	0	124	9661	1443373	1	0	0	4.51215	1	XXX	FALSE
Ssa_1595	up	0	81	9661	1443416	1	0	0	6.96289	1	XXX	FALSE
Ssa_1365	up	0	92	9661	1443405	1	0	0	6.11352	1	XXX	FALSE
Ssa_0195	up	1	65	9660	1443432	0.356132	2.299	0.0573245	13.2727	0.984	DTT	FALSE
Ssa_1596	up	0	64	9661	1443433	1	0	0	8.86716	1	XXX	FALSE
Ssa_0791	up	0	108	9661	1443389	1	0	0	5.19281	1	DTT	FALSE
Ssa_1692	up	1	75	9660	1443422	0.397682	1.992	0.0497802	11.451	1	XXX	FALSE
Ssa_0211	up	0	93	9661	1443404	1	0	0	6.04646	1	DTT	FALSE
Ssa_0234	up	3	181	9658	1443316	0.125018	2.477	0.505995	7.35742	0.586	DTT	FALSE
Ssa_1526	up	0	36	9661	1443461	1	0	0	16.1233	1	XXX	FALSE
Ssa_1888	up	0	3	9661	1443494	1	0	0	359.362	1	XXX	FALSE
Ssa_0025	up	4	303	9657	1443194	0.149744	1.973	0.533991	5.10569	0.649	DTX	FALSE
Ssa_0226	up	2	64	9659	1443433	0.0717077	4.67	0.553568	17.575	0.437	DTT	FALSE
Ssa_1367	up	1	165	9660	1443332	1	0.906	0.0227874	5.11686	1	XXX	FALSE
Ssa_1307	up	0	13	9661	1443484	1	0	0	49.0494	1	XXX	FALSE
Ssa_0710	up	4	282	9657	1443215	0.124891	2.12	0.573497	5.48885	0.586	DTH	FALSE
Ssa_0714	up	3	252	9658	1443245	0.241263	1.779	0.364366	5.25995	0.816	DTA	FALSE
Ssa_1621	up	2	167	9659	1443330	0.309739	1.79	0.21491	6.56892	0.921	XXX	FALSE
Ssa_2003	up	2	210	9659	1443287	0.65501	1.423	0.171165	5.20652	1	XXX	FALSE
Ssa_0733	up	1	223	9660	1443274	1	0.67	0.0168861	3.77233	1	DTK	FALSE
Ssa_0653	up	0	66	9661	1443431	1	0	0	8.59102	1	DTX	FALSE
Ssa_0230	up	6	295	9655	1443202	0.0162333	3.04	1.10645	6.69961	0.178	DTT	FALSE
Ssa_1412	up	2	171	9659	1443326	0.319471	1.748	0.209921	6.41205	0.933	XXX	FALSE
Ssa_1757	up	0	49	9661	1443448	1	0	0	11.6873	1	XXX	FALSE
Ssa_0748	up	0	26	9661	1443471	1	0	0	22.7813	1	DTT	FALSE
Ssa_1497	up	0	71	9661	1443426	1	0	0	7.97058	1	XXX	FALSE
Ssa_0057	up	1	203	9660	1443294	1	0.736	0.0185419	4.14867	1	DTC	FALSE
Ssa_1691	up	1	107	9660	1443390	0.513461	1.396	0.035028	7.95035	1	XXX	FALSE
Ssa_0526	up	0	166	9661	1443331	0.632851	0	0	3.35775	1	RLX	FALSE
Ssa_0315	up	1	166	9660	1443331	1	0.9	0.022651	5.08563	1	RIL	FALSE
Ssa_0749	up	0	49	9661	1443448	1	0	0	11.6873	1	DTT	FALSE
Ssa_1645	up	0	105	9661	1443392	1	0	0	5.344	1	XXX	FALSE
Ssa_0030	up	0	153	9661	1443344	0.630949	0	0	3.64652	1	DTX	FALSE
Ssa_0692	up	3	138	9658	1443359	0.0685356	3.249	0.661777	9.69794	0.428	DTX	FALSE
Ssa_1265	up	1	26	9660	1443471	0.164817	5.747	0.140169	35.0208	0.681	XXX	FALSE
Ssa_0407	up	0	22	9661	1443475	1	0	0	27.2913	1	RLB	FALSE
Ssa_0403	up	0	41	9661	1443456	1	0	0	14.0654	1	RLB	FALSE
Ssa_0593	up	9	371	9652	1443126	0.00116315	3.627	1.64496	6.96354	0.027	RLX	TRUE
Ssa_1989	up	1	201	9660	1443296	1	0.743	0.0187256	4.19036	1	XXX	FALSE
Ssa_0019	up	1	277	9660	1443220	1	0.539	0.013608	3.03076	1	DTX	FALSE
Ssa_1178	up	1	83	9660	1443414	0.428983	1.8	0.0450383	10.3117	1	XXX	FALSE
Ssa_1736	up	1	44	9660	1443453	0.259312	3.396	0.0840847	19.9386	0.848	XXX	FALSE
Ssa_1243	up	0	107	9661	1443390	1	0	0	5.24224	1	XXX	FALSE
Ssa_1561	up	1	219	9660	1443278	1	0.682	0.0171932	3.84161	1	XXX	FALSE
Ssa_1659	up	0	70	9661	1443427	1	0	0	8.08739	1	XXX	FALSE
Ssa_1351	up	1	28	9660	1443469	0.175885	5.337	0.130498	32.2696	0.703	XXX	FALSE
Ssa_0171	up	1	105	9660	1443392	0.506926	1.423	0.035689	8.105	1	DTA	FALSE
Ssa_0073	up	2	167	9659	1443330	0.309739	1.79	0.21491	6.56892	0.921	DTH	FALSE
Ssa_1135	up	0	52	9661	1443445	1	0	0	10.9879	1	XXX	FALSE
Ssa_0870	up	0	6	9661	1443491	1	0	0	127.31	1	RIR	FALSE
Ssa_1771	up	0	25	9661	1443472	1	0	0	23.7605	1	XXX	FALSE
Ssa_0818	up	0	70	9661	1443427	1	0	0	8.08739	1	RIC	FALSE
Ssa_1840	up	0	59	9661	1443438	1	0	0	9.64225	1	XXX	FALSE
Ssa_1170	up	1	45	9660	1443452	0.264237	3.321	0.0822562	19.4729	0.856	XXX	FALSE
Ssa_1154	up	0	140	9661	1443357	1	0	0	3.98964	1	XXX	FALSE
Ssa_0329	up	2	189	9659	1443308	0.362775	1.581	0.190062	5.79297	0.994	RIL	FALSE
Ssa_1198	up	1	113	9660	1443384	0.532551	1.322	0.0331841	7.51976	1	XXX	FALSE
Ssa_0923	up	0	39	9661	1443458	1	0	0	14.8223	1	RLG	FALSE
Ssa_0124	up	3	296	9658	1443201	0.456076	1.514	0.310515	4.47075	1	DTA	FALSE
Ssa_0914	up	0	73	9661	1443424	1	0	0	7.74681	1	RLG	FALSE
Ssa_1705	up	0	16	9661	1443481	1	0	0	38.7692	1	XXX	FALSE
Ssa_1416	up	2	180	9659	1443317	0.341236	1.66	0.199499	6.08719	0.967	XXX	FALSE
Ssa_1551	up	0	94	9661	1443403	1	0	0	5.98082	1	XXX	FALSE
Ssa_1195	up	2	71	9659	1443426	0.0852669	4.21	0.500033	15.7787	0.479	XXX	FALSE
Ssa_2004	up	0	103	9661	1443394	1	0	0	5.44798	1	XXX	FALSE
Ssa_1900	up	0	8	9661	1443489	1	0	0	87.5799	1	XXX	FALSE
Ssa_1172	up	0	124	9661	1443373	1	0	0	4.51215	1	XXX	FALSE
Ssa_0731	up	1	124	9660	1443373	0.565624	1.205	0.0302633	6.84037	1	DTA	FALSE
Ssa_1276	up	1	113	9660	1443384	0.532551	1.322	0.0331841	7.51976	1	XXX	FALSE
Ssa_1830	up	0	136	9661	1443361	1	0	0	4.10859	1	XXX	FALSE
Ssa_0619	up	6	477	9655	1443020	0.14582	1.88	0.68628	4.12395	0.638	RLX	FALSE
Ssa_0744	up	3	84	9658	1443413	0.0205867	5.338	1.0789	16.1425	0.197	DTT	FALSE
Ssa_0492	up	0	132	9661	1443365	1	0	0	4.23485	1	RST	FALSE
Ssa_1883	up	1	32	9660	1443465	0.197584	4.67	0.114674	27.9639	0.733	XXX	FALSE
Ssa_1434	up	2	203	9659	1443294	0.395722	1.472	0.177033	5.38835	1	XXX	FALSE
Ssa_1552	up	3	120	9658	1443377	0.0494165	3.736	0.759677	11.1872	0.355	XXX	FALSE
Ssa_1299	up	3	80	9658	1443417	0.0181953	5.604	1.13175	16.9781	0.188	XXX	FALSE
Ssa_1371	up	0	37	9661	1443460	1	0	0	15.6651	1	XXX	FALSE
Ssa_1658	up	0	35	9661	1443462	1	0	0	16.609	1	XXX	FALSE
Ssa_1485	up	0	32	9661	1443465	1	0	0	18.2611	1	XXX	FALSE
Ssa_1678	up	0	96	9661	1443401	1	0	0	5.85357	1	XXX	FALSE
Ssa_1598	up	0	33	9661	1443464	1	0	0	17.6777	1	XXX	FALSE
Ssa_1563	up	4	192	9657	1443305	0.0428231	3.114	0.839664	8.10502	0.329	XXX	FALSE
Ssa_1632	up	1	115	9660	1443382	0.538746	1.299	0.0326118	7.38639	1	XXX	FALSE
Ssa_0813	up	1	67	9660	1443430	0.364665	2.23	0.0556381	12.8631	0.996	RIC	FALSE
Ssa_1319	up	4	95	9657	1443402	0.00445366	6.293	1.67992	16.6617	0.072	XXX	TRUE
Ssa_0788	up	0	69	9661	1443428	1	0	0	8.20767	1	DTT	FALSE
Ssa_1487	up	0	28	9661	1443469	1	0	0	21.0398	1	XXX	FALSE
Ssa_0229	up	1	153	9660	1443344	1	0.977	0.0245634	5.52504	1	DTT	FALSE
Ssa_1656	up	1	35	9660	1443462	0.213482	4.269	0.105114	25.4078	0.767	XXX	FALSE
Ssa_1573	up	0	104	9661	1443393	1	0	0	5.3946	1	XXX	FALSE
Ssa_1119	up	0	22	9661	1443475	1	0	0	27.2913	1	XXX	FALSE
Ssa_1557	up	1	186	9660	1443311	1	0.803	0.0202279	4.53213	1	XXX	FALSE
Ssa_0487	up	0	51	9661	1443446	1	0	0	11.2115	1	RST	FALSE
Ssa_1546	up	2	54	9659	1443443	0.0537406	5.536	0.653537	20.9892	0.371	XXX	FALSE
Ssa_1817	up	1	103	9660	1443394	0.500303	1.451	0.0363755	8.26576	1	XXX	FALSE
Ssa_0830	up	0	2	9661	1443495	1	0	0	802.444	1	RIL	FALSE
Ssa_0651	up	0	71	9661	1443426	1	0	0	7.97058	1	DTX	FALSE
Ssa_1568	up	0	25	9661	1443472	1	0	0	23.7605	1	XXX	FALSE
Ssa_1586	up	0	57	9661	1443440	1	0	0	9.99175	1	XXX	FALSE
Ssa_1514	up	0	101	9661	1443396	1	0	0	5.558	1	XXX	FALSE
Ssa_1236	up	0	38	9661	1443459	1	0	0	15.2321	1	XXX	FALSE
Ssa_0117	up	0	103	9661	1443394	1	0	0	5.44798	1	DTA	FALSE
Ssa_1213	up	0	156	9661	1443341	0.631168	0	0	3.57547	1	XXX	FALSE
Ssa_1533	up	0	82	9661	1443415	1	0	0	6.87605	1	XXX	FALSE
Ssa_1129	up	3	215	9658	1443282	0.178079	2.085	0.426591	6.17772	0.706	XXX	FALSE
Ssa_0654	up	0	85	9661	1443412	1	0	0	6.62804	1	DTX	FALSE
Ssa_0801	up	0	43	9661	1443454	1	0	0	13.3819	1	RIC	FALSE
Ssa_1846	up	0	15	9661	1443482	1	0	0	41.6629	1	XXX	FALSE
Ssa_0239	up	0	106	9661	1443391	1	0	0	5.29263	1	DTT	FALSE
Ssa_0419	up	0	39	9661	1443458	1	0	0	14.8223	1	RYD	FALSE
Ssa_1377	up	4	234	9657	1443263	0.0757333	2.555	0.690175	6.63175	0.446	XXX	FALSE
Ssa_1208	up	2	58	9659	1443439	0.0607133	5.154	0.609508	19.476	0.391	XXX	FALSE
Ssa_0708	up	1	61	9660	1443436	0.33872	2.45	0.0610238	14.1761	0.964	DTH	FALSE
Ssa_1139	up	2	182	9659	1443315	0.346044	1.642	0.197322	6.01893	0.969	XXX	FALSE
Ssa_1368	up	0	26	9661	1443471	1	0	0	22.7813	1	XXX	FALSE
Ssa_0615	up	4	211	9657	1443286	0.0564696	2.833	0.764729	7.36314	0.375	RLX	FALSE
Ssa_0953	up	0	7	9661	1443490	1	0	0	103.879	1	RLG	FALSE
Ssa_1899	up	0	40	9661	1443457	1	0	0	14.434	1	XXX	FALSE
Ssa_1316	up	0	48	9661	1443449	1	0	0	11.9408	1	XXX	FALSE
Ssa_0854	up	1	74	9660	1443423	0.39365	2.019	0.0504441	11.6103	1	RIP	FALSE
Ssa_1904	up	0	2	9661	1443495	1	0	0	802.444	1	XXX	FALSE
Ssa_1777	up	0	2	9661	1443495	1	0	0	802.444	1	XXX	FALSE
Ssa_1141	up	0	14	9661	1443483	1	0	0	45.0775	1	XXX	FALSE
Ssa_1968	up	1	82	9660	1443415	0.425161	1.822	0.045581	10.4408	1	XXX	FALSE
Ssa_0207	up	0	230	9661	1443267	0.413684	0	0	2.41579	1	DTT	FALSE
Ssa_0314	up	0	142	9661	1443355	1	0	0	3.93271	1	RIL	FALSE
Ssa_1716	up	1	2	9660	1443495	0.0198125	74.719	1.26628	1415.94	0.197	XXX	FALSE
Ssa_0254	up	0	47	9661	1443450	1	0	0	12.2054	1	DTT	FALSE
Ssa_1201	up	0	14	9661	1443483	1	0	0	45.0775	1	XXX	FALSE
Ssa_1518	up	2	100	9659	1443397	0.147862	2.989	0.356975	11.0848	0.642	XXX	FALSE
Ssa_0431	up	0	22	9661	1443475	1	0	0	27.2913	1	RLG	FALSE
Ssa_0095	up	1	76	9660	1443421	0.401686	1.966	0.0491336	11.296	1	DTA	FALSE
Ssa_0077	up	0	16	9661	1443481	1	0	0	38.7692	1	DTA	FALSE
Ssa_0251	up	0	168	9661	1443329	0.633352	0	0	3.31733	1	DTT	FALSE
Ssa_0666	up	0	72	9661	1443425	1	0	0	7.85711	1	DTX	FALSE
Ssa_1483	up	1	222	9660	1443275	1	0.673	0.0169618	3.78951	1	XXX	FALSE
Ssa_1745	up	0	24	9661	1443473	1	0	0	24.8314	1	XXX	FALSE
Ssa_0136	up	1	137	9660	1443360	0.601708	1.091	0.0274119	6.18079	1	DTA	FALSE
Ssa_0471	up	0	22	9661	1443475	1	0	0	27.2913	1	RLG	FALSE
Ssa_1901	up	0	30	9661	1443467	1	0	0	19.5563	1	XXX	FALSE
Ssa_0761	up	0	13	9661	1443484	1	0	0	49.0494	1	DTT	FALSE
Ssa_0977	up	0	80	9661	1443417	1	0	0	7.05196	1	XXX	FALSE
Ssa_0925	up	1	43	9660	1443454	0.254355	3.475	0.0859963	20.4272	0.836	RLG	FALSE
Ssa_1803	up	0	64	9661	1443433	1	0	0	8.86716	1	XXX	FALSE
Ssa_1619	up	0	80	9661	1443417	1	0	0	7.05196	1	XXX	FALSE
Ssa_0240	up	0	181	9661	1443316	0.637792	0	0	3.07633	1	DTT	FALSE
Ssa_0737	up	1	105	9660	1443392	0.506926	1.423	0.035689	8.105	1	DTT	FALSE
Ssa_0474	up	1	76	9660	1443421	0.401686	1.966	0.0491336	11.296	1	RLG	FALSE
Ssa_0250	up	0	16	9661	1443481	1	0	0	38.7692	1	DTT	FALSE
Ssa_0065	up	1	56	9660	1443441	0.316292	2.668	0.0663782	15.4963	0.929	DTC	FALSE
Ssa_1349	up	2	98	9659	1443399	0.143287	3.05	0.36416	11.3171	0.635	XXX	FALSE
Ssa_1133	up	0	156	9661	1443341	0.631168	0	0	3.57547	1	XXX	FALSE
Ssa_1700	up	1	49	9660	1443448	0.283609	3.049	0.0756738	17.8027	0.888	XXX	FALSE
Ssa_1674	up	0	28	9661	1443469	1	0	0	21.0398	1	XXX	FALSE
Ssa_1329	up	3	148	9658	1443349	0.0803936	3.029	0.617563	9.02855	0.464	XXX	FALSE
Ssa_1949	up	0	14	9661	1443483	1	0	0	45.0775	1	XXX	FALSE
Ssa_1684	up	3	125	9658	1443372	0.0544285	3.587	0.72972	10.732	0.371	XXX	FALSE
Ssa_0650	up	0	16	9661	1443481	1	0	0	38.7692	1	DTX	FALSE
Ssa_1123	up	0	52	9661	1443445	1	0	0	10.9879	1	XXX	FALSE
Ssa_0111	up	2	116	9659	1443381	0.185384	2.576	0.308306	9.52164	0.721	DTA	FALSE
Ssa_0112	up	0	63	9661	1443434	1	0	0	9.01202	1	DTA	FALSE
Ssa_0113	up	0	23	9661	1443474	1	0	0	26.0042	1	DTA	FALSE
Ssa_1606	up	0	81	9661	1443416	1	0	0	6.96289	1	XXX	FALSE
Ssa_0107	up	0	64	9661	1443433	1	0	0	8.86716	1	DTA	FALSE
Ssa_0887	up	0	112	9661	1443385	1	0	0	5.00408	1	RIL	FALSE
Ssa_1306	up	0	6	9661	1443491	1	0	0	127.31	1	XXX	FALSE
Ssa_1228	up	1	12	9660	1443485	0.083063	12.452	0.29127	84.2002	0.468	XXX	FALSE
Ssa_0197	up	1	170	9660	1443327	1	0.879	0.022121	4.96439	1	DTT	FALSE
Ssa_1553	up	0	38	9661	1443459	1	0	0	15.2321	1	XXX	FALSE
Ssa_0079	up	2	162	9659	1443335	0.297535	1.845	0.22149	6.7749	0.908	DTA	FALSE
Ssa_1311	up	0	23	9661	1443474	1	0	0	26.0042	1	XXX	FALSE
Ssa_1756	up	0	20	9661	1443477	1	0	0	30.278	1	XXX	FALSE
Ssa_1277	up	0	57	9661	1443440	1	0	0	9.99175	1	XXX	FALSE
Ssa_0772	up	1	80	9660	1443417	0.41744	1.868	0.0467067	10.7088	1	DTB	FALSE
Ssa_1325	up	2	50	9659	1443447	0.0470776	5.977	0.704412	22.7569	0.344	XXX	FALSE
Ssa_1879	up	0	14	9661	1443483	1	0	0	45.0775	1	XXX	FALSE
Ssa_1588	up	0	16	9661	1443481	1	0	0	38.7692	1	XXX	FALSE
Ssa_1786	up	5	203	9656	1443294	0.0132476	3.682	1.1824	8.73581	0.157	XXX	FALSE
Ssa_1739	up	1	125	9660	1443372	0.568512	1.195	0.0300231	6.78464	1	XXX	FALSE
Ssa_1273	up	1	49	9660	1443448	0.283609	3.049	0.0756738	17.8027	0.888	XXX	FALSE
Ssa_0660	up	2	281	9659	1443216	0.713212	1.063	0.128131	3.87884	1	DTX	FALSE
Ssa_1122	up	0	24	9661	1443473	1	0	0	24.8314	1	XXX	FALSE
Ssa_1239	up	1	65	9660	1443432	0.356132	2.299	0.0573245	13.2727	0.984	XXX	FALSE
Ssa_0405	up	3	533	9658	1442964	1	0.841	0.172831	2.47156	1	RLB	FALSE
Ssa_1875	up	0	62	9661	1443435	1	0	0	9.1617	1	XXX	FALSE
Ssa_0281	up	0	75	9661	1443422	1	0	0	7.53527	1	DTX	FALSE
Ssa_1675	up	0	3	9661	1443494	1	0	0	359.362	1	XXX	FALSE
Ssa_1647	up	3	182	9658	1443315	0.126487	2.463	0.503239	7.31637	0.589	XXX	FALSE
Ssa_0268	up	2	64	9659	1443433	0.0717077	4.67	0.553568	17.575	0.437	DTT	FALSE
Ssa_1323	up	2	55	9659	1443442	0.0554556	5.435	0.641944	20.5893	0.371	XXX	FALSE
Ssa_1652	up	0	123	9661	1443374	1	0	0	4.54938	1	XXX	FALSE
Ssa_1536	up	3	110	9658	1443387	0.0401107	4.076	0.827724	12.2304	0.314	XXX	FALSE
Ssa_1711	up	1	19	9660	1443478	0.124894	7.865	0.18926	49.5036	0.586	XXX	FALSE
Ssa_1217	up	0	77	9661	1443420	1	0	0	7.33168	1	XXX	FALSE
Ssa_0895	up	0	125	9661	1443372	1	0	0	4.47552	1	RLC	FALSE
Ssa_0318	up	1	53	9660	1443444	0.302472	2.819	0.0700668	16.4142	0.914	RIL	FALSE
Ssa_1249	up	0	277	9661	1443220	0.27239	0	0	2.00316	0.87	XXX	FALSE
Ssa_0166	up	1	72	9660	1443425	0.385507	2.075	0.0518264	11.9425	1	DTA	FALSE
Ssa_1324	up	0	35	9661	1443462	1	0	0	16.609	1	XXX	FALSE
Ssa_1344	up	0	23	9661	1443474	1	0	0	26.0042	1	XXX	FALSE
Ssa_0951	up	0	69	9661	1443428	1	0	0	8.20767	1	RLG	FALSE
Ssa_0799	up	0	255	9661	1443242	0.423742	0	0	2.17706	1	RIJ	FALSE
Ssa_0924	up	0	6	9661	1443491	1	0	0	127.31	1	RLG	FALSE
Ssa_1559	up	0	60	9661	1443437	1	0	0	9.47654	1	XXX	FALSE
Ssa_0857	up	0	7	9661	1443490	1	0	0	103.879	1	RIR	FALSE
Ssa_0945	up	0	33	9661	1443464	1	0	0	17.6777	1	RLG	FALSE
Ssa_1813	up	0	113	9661	1443384	1	0	0	4.95903	1	XXX	FALSE
Ssa_1353	up	0	74	9661	1443423	1	0	0	7.63958	1	XXX	FALSE
Ssa_1527	up	0	107	9661	1443390	1	0	0	5.24224	1	XXX	FALSE
Ssa_1342	up	0	25	9661	1443472	1	0	0	23.7605	1	XXX	FALSE
Ssa_0103	up	0	87	9661	1443410	1	0	0	6.4724	1	DTA	FALSE
Ssa_1121	up	0	65	9661	1443432	1	0	0	8.7269	1	XXX	FALSE
Ssa_0237	up	2	67	9659	1443430	0.0774275	4.461	0.529281	16.7574	0.449	DTT	FALSE
Ssa_1321	up	0	94	9661	1443403	1	0	0	5.98082	1	XXX	FALSE
Ssa_0466	up	0	6	9661	1443491	1	0	0	127.31	1	RLG	FALSE
Ssa_0736	up	1	127	9660	1443370	0.574231	1.177	0.0295539	6.67553	1	DTT	FALSE
Ssa_1599	up	1	96	9660	1443401	0.476416	1.556	0.0390011	8.88283	1	XXX	FALSE
Ssa_1970	up	0	89	9661	1443408	1	0	0	6.32391	1	XXX	FALSE
Ssa_1222	up	2	91	9659	1443406	0.127529	3.284	0.391758	12.2135	0.592	XXX	FALSE
Ssa_1953	up	0	1	9661	1443496	1	0	0	5340.97	1	XXX	FALSE
Ssa_1964	up	3	87	9658	1443410	0.0224878	5.154	1.04239	15.5682	0.207	XXX	FALSE
Ssa_1494	up	0	39	9661	1443458	1	0	0	14.8223	1	XXX	FALSE
Ssa_1794	up	1	130	9660	1443367	0.582667	1.149	0.028877	6.51806	1	XXX	FALSE
Ssa_1831	up	0	20	9661	1443477	1	0	0	30.278	1	XXX	FALSE
Ssa_1695	up	0	75	9661	1443422	1	0	0	7.53527	1	XXX	FALSE
Ssa_0037	up	0	27	9661	1443470	1	0	0	21.8857	1	DTX	FALSE
Ssa_0968	up	4	109	9657	1443388	0.00708255	5.486	1.46792	14.4523	0.098	XXX	TRUE
Ssa_0726	up	0	19	9661	1443478	1	0	0	32.0068	1	DTA	FALSE
Ssa_0044	up	0	145	9661	1443352	1	0	0	3.8503	1	DTX	FALSE
Ssa_1614	up	0	5	9661	1443492	1	0	0	163.157	1	XXX	FALSE
Ssa_1708	up	0	1	9661	1443496	1	0	0	5340.97	1	XXX	FALSE
Ssa_1636	up	0	29	9661	1443468	1	0	0	20.2723	1	XXX	FALSE
Ssa_0140	up	0	63	9661	1443434	1	0	0	9.01202	1	DTA	FALSE
Ssa_0812	up	0	50	9661	1443447	1	0	0	11.4445	1	RIC	FALSE
Ssa_1120	up	0	19	9661	1443478	1	0	0	32.0068	1	XXX	FALSE
Ssa_1880	up	0	2	9661	1443495	1	0	0	802.444	1	XXX	FALSE
Ssa_1149	up	0	48	9661	1443449	1	0	0	11.9408	1	XXX	FALSE
Ssa_1338	up	1	36	9660	1443461	0.218711	4.151	0.102272	24.6619	0.773	XXX	FALSE
Ssa_0118	up	0	40	9661	1443457	1	0	0	14.434	1	DTA	FALSE
Ssa_1330	up	0	48	9661	1443449	1	0	0	11.9408	1	XXX	FALSE
Ssa_1284	up	0	57	9661	1443440	1	0	0	9.99175	1	XXX	FALSE
Ssa_0406	up	1	253	9660	1443244	1	0.591	0.0148938	3.32088	1	RLB	FALSE
Ssa_1796	up	2	16	9659	1443481	0.00629991	18.679	2.0834	79.3527	0.089	XXX	TRUE
Ssa_1628	up	0	7	9661	1443490	1	0	0	103.879	1	XXX	FALSE
Ssa_0212	up	0	17	9661	1443480	1	0	0	36.2264	1	DTT	FALSE
Ssa_1491	up	0	58	9661	1443439	1	0	0	9.81387	1	XXX	FALSE
Ssa_1811	up	0	34	9661	1443463	1	0	0	17.1249	1	XXX	FALSE
Ssa_1740	up	0	17	9661	1443480	1	0	0	36.2264	1	XXX	FALSE
Ssa_1762	up	0	33	9661	1443464	1	0	0	17.6777	1	XXX	FALSE
Ssa_0275	up	1	111	9660	1443386	0.526272	1.346	0.0337768	7.65803	1	DTT	FALSE
Ssa_1665	up	0	38	9661	1443459	1	0	0	15.2321	1	XXX	FALSE
Ssa_0917	up	0	30	9661	1443467	1	0	0	19.5563	1	RLG	FALSE
Ssa_1912	up	0	10	9661	1443487	1	0	0	66.6642	1	XXX	FALSE
Ssa_1248	up	0	7	9661	1443490	1	0	0	103.879	1	XXX	FALSE
Ssa_1138	up	0	11	9661	1443486	1	0	0	59.5704	1	XXX	FALSE
Ssa_1539	up	0	45	9661	1443452	1	0	0	12.7616	1	XXX	FALSE
Ssa_0848	up	0	46	9661	1443451	1	0	0	12.4821	1	RIN	FALSE
Ssa_1294	up	0	11	9661	1443486	1	0	0	59.5704	1	XXX	FALSE
Ssa_1874	up	1	6	9660	1443491	0.0456201	24.888	0.541383	204.822	0.34	XXX	FALSE
Ssa_1704	up	0	1	9661	1443496	1	0	0	5340.97	1	XXX	FALSE
Ssa_1111	up	2	79	9659	1443418	0.101609	3.783	0.450251	14.1321	0.524	XXX	FALSE
Ssa_1760	up	0	15	9661	1443482	1	0	0	41.6629	1	XXX	FALSE
Ssa_1916	up	0	1	9661	1443496	1	0	0	5340.97	1	XXX	FALSE
Ssa_0810	up	1	18	9660	1443479	0.119037	8.301	0.199228	52.6253	0.578	RIC	FALSE
Ssa_0436	up	0	3	9661	1443494	1	0	0	359.362	1	RLG	FALSE
Ssa_1512	up	0	125	9661	1443372	1	0	0	4.47552	1	XXX	FALSE
Ssa_1748	up	0	20	9661	1443477	1	0	0	30.278	1	XXX	FALSE
Ssa_0885	up	1	65	9660	1443432	0.356132	2.299	0.0573245	13.2727	0.984	RIL	FALSE
Ssa_1241	up	0	13	9661	1443484	1	0	0	49.0494	1	XXX	FALSE
Ssa_1543	up	1	26	9660	1443471	0.164817	5.747	0.140169	35.0208	0.681	XXX	FALSE
Ssa_1815	up	0	91	9661	1443406	1	0	0	6.18208	1	XXX	FALSE
Ssa_1331	up	0	40	9661	1443457	1	0	0	14.434	1	XXX	FALSE
Ssa_0706	up	0	15	9661	1443482	1	0	0	41.6629	1	RYD	FALSE
Ssa_0348	up	0	22	9661	1443475	1	0	0	27.2913	1	RIP	FALSE
Ssa_1835	up	0	24	9661	1443473	1	0	0	24.8314	1	XXX	FALSE
Ssa_1604	up	0	87	9661	1443410	1	0	0	6.4724	1	XXX	FALSE
Ssa_1689	up	0	3	9661	1443494	1	0	0	359.362	1	XXX	FALSE
Ssa_0385	up	0	34	9661	1443463	1	0	0	17.1249	1	RIL	FALSE
Ssa_0859	up	1	13	9660	1443484	0.0891592	11.494	0.270446	76.6545	0.492	RIR	FALSE
Ssa_1364	up	0	14	9661	1443483	1	0	0	45.0775	1	XXX	FALSE
Ssa_1125	up	0	68	9661	1443429	1	0	0	8.33159	1	XXX	FALSE
Ssa_1727	up	1	10	9660	1443487	0.0707482	14.945	0.34429	105.078	0.435	XXX	FALSE
Ssa_1681	up	1	29	9660	1443468	0.181364	5.153	0.126146	31.0678	0.712	XXX	FALSE
Ssa_0646	up	0	64	9661	1443433	1	0	0	8.86716	1	DTX	FALSE
Ssa_0827	up	0	29	9661	1443468	1	0	0	20.2723	1	RIL	FALSE
Ssa_1510	up	0	25	9661	1443472	1	0	0	23.7605	1	XXX	FALSE
Ssa_1917	up	0	9	9661	1443488	1	0	0	75.67	1	XXX	FALSE
Ssa_1761	up	0	27	9661	1443470	1	0	0	21.8857	1	XXX	FALSE
Ssa_1826	up	0	26	9661	1443471	1	0	0	22.7813	1	XXX	FALSE
Ssa_1765	up	0	4	9661	1443493	1	0	0	226.53	1	XXX	FALSE
Ssa_1998	up	0	16	9661	1443481	1	0	0	38.7692	1	XXX	FALSE
Ssa_0837	up	0	56	9661	1443441	1	0	0	10.1762	1	RIL	FALSE
Ssa_0893	up	0	37	9661	1443460	1	0	0	15.6651	1	RLB	FALSE
Ssa_1677	up	0	9	9661	1443488	1	0	0	75.67	1	XXX	FALSE
Ssa_0795	up	0	7	9661	1443490	1	0	0	103.879	1	DTT	FALSE
Ssa_0709	up	0	2	9661	1443495	1	0	0	802.444	1	DTH	FALSE
Ssa_1710	up	0	28	9661	1443469	1	0	0	21.0398	1	XXX	FALSE
Ssa_0323	up	1	59	9660	1443438	0.329839	2.533	0.0630584	14.676	0.95	RIL	FALSE
Ssa_0246	up	0	70	9661	1443427	1	0	0	8.08739	1	DTT	FALSE
Ssa_0970	up	1	11	9660	1443486	0.0769261	13.579	0.315569	93.7115	0.448	XXX	FALSE
Ssa_1605	up	0	59	9661	1443438	1	0	0	9.64225	1	XXX	FALSE
Ssa_1313	up	2	79	9659	1443418	0.101609	3.783	0.450251	14.1321	0.524	XXX	FALSE
Ssa_1741	up	0	6	9661	1443491	1	0	0	127.31	1	XXX	FALSE
Ssa_0724	up	0	3	9661	1443494	1	0	0	359.362	1	DTA	FALSE
Ssa_1480	up	0	53	9661	1443444	1	0	0	10.773	1	XXX	FALSE
Ssa_1597	up	1	73	9660	1443424	0.389592	2.047	0.0511259	11.774	1	XXX	FALSE
Ssa_0835	up	0	48	9661	1443449	1	0	0	11.9408	1	RIL	FALSE
Ssa_0921	up	0	1	9661	1443496	1	0	0	5340.97	1	RLG	FALSE
Ssa_1641	up	0	52	9661	1443445	1	0	0	10.9879	1	XXX	FALSE
Ssa_1713	up	0	15	9661	1443482	1	0	0	41.6629	1	XXX	FALSE
Ssa_1124	up	1	163	9660	1443334	1	0.917	0.0230654	5.18047	1	XXX	FALSE
Ssa_1902	up	1	98	9660	1443399	0.483355	1.525	0.038213	8.69655	1	XXX	FALSE
Ssa_0012	up	0	10	9661	1443487	1	0	0	66.6642	1	DYC	FALSE
Ssa_1753	up	0	17	9661	1443480	1	0	0	36.2264	1	XXX	FALSE
Ssa_1750	up	0	10	9661	1443487	1	0	0	66.6642	1	XXX	FALSE
Ssa_0238	up	0	5	9661	1443492	1	0	0	163.157	1	DTT	FALSE
Ssa_1945	up	0	1	9661	1443496	1	0	0	5340.97	1	XXX	FALSE
Ssa_1549	up	0	9	9661	1443488	1	0	0	75.67	1	XXX	FALSE
Ssa_1940	up	0	1	9661	1443496	1	0	0	5340.97	1	XXX	FALSE
Ssa_0228	up	0	28	9661	1443469	1	0	0	21.0398	1	DTT	FALSE
Ssa_0775	up	0	56	9661	1443441	1	0	0	10.1762	1	DTB	FALSE
Ssa_1816	up	0	52	9661	1443445	1	0	0	10.9879	1	XXX	FALSE
Ssa_0213	up	0	82	9661	1443415	1	0	0	6.87605	1	DTT	FALSE
Ssa_1729	up	0	5	9661	1443492	1	0	0	163.157	1	XXX	FALSE
Ssa_1142	up	0	29	9661	1443468	1	0	0	20.2723	1	XXX	FALSE
Ssa_0882	up	0	15	9661	1443482	1	0	0	41.6629	1	RIL	FALSE
Ssa_1999	up	1	55	9660	1443442	0.311716	2.717	0.0675638	15.7906	0.923	XXX	FALSE
Ssa_1834	up	0	12	9661	1443485	1	0	0	53.7841	1	XXX	FALSE
Ssa_0675	up	0	72	9661	1443425	1	0	0	7.85711	1	DTX	FALSE
Ssa_1131	up	0	41	9661	1443456	1	0	0	14.0654	1	XXX	FALSE
Ssa_1886	up	0	5	9661	1443492	1	0	0	163.157	1	XXX	FALSE
Ssa_1660	up	0	4	9661	1443493	1	0	0	226.53	1	XXX	FALSE
Ssa_0159	up	0	4	9661	1443493	1	0	0	226.53	1	DTA	FALSE
Ssa_1845	up	0	22	9661	1443475	1	0	0	27.2913	1	XXX	FALSE
Ssa_1685	up	0	16	9661	1443481	1	0	0	38.7692	1	XXX	FALSE
Ssa_0920	up	0	13	9661	1443484	1	0	0	49.0494	1	RLG	FALSE
Ssa_1500	up	1	84	9660	1443413	0.432779	1.779	0.0445083	10.1858	1	XXX	FALSE
Ssa_1779	up	0	6	9661	1443491	1	0	0	127.31	1	XXX	FALSE
Ssa_0820	up	2	15	9659	1443482	0.00562464	19.927	2.21069	85.8501	0.083	RIC	TRUE
Ssa_1136	up	0	65	9661	1443432	1	0	0	8.7269	1	XXX	FALSE
Ssa_1805	up	0	83	9661	1443414	1	0	0	6.79134	1	XXX	FALSE
Ssa_1266	up	0	10	9661	1443487	1	0	0	66.6642	1	XXX	FALSE
Ssa_1630	up	0	53	9661	1443444	1	0	0	10.773	1	XXX	FALSE
Ssa_0905	up	0	22	9661	1443475	1	0	0	27.2913	1	RLE	FALSE
Ssa_1731	up	0	7	9661	1443490	1	0	0	103.879	1	XXX	FALSE
Ssa_0040	up	0	2	9661	1443495	1	0	0	802.444	1	DTX	FALSE
Ssa_0902	up	0	46	9661	1443451	1	0	0	12.4821	1	RLE	FALSE
Ssa_1948	up	0	4	9661	1443493	1	0	0	226.53	1	XXX	FALSE
Ssa_1643	up	0	31	9661	1443466	1	0	0	18.8849	1	XXX	FALSE
Ssa_0910	up	0	17	9661	1443480	1	0	0	36.2264	1	RLE	FALSE
Ssa_1520	up	0	66	9661	1443431	1	0	0	8.59102	1	XXX	FALSE
Ssa_1235	up	2	85	9659	1443412	0.114378	3.516	0.418973	13.1031	0.565	XXX	FALSE
Ssa_1714	up	0	7	9661	1443490	1	0	0	103.879	1	XXX	FALSE
Ssa_1627	up	0	46	9661	1443451	1	0	0	12.4821	1	XXX	FALSE
Ssa_0700	up	0	7	9661	1443490	1	0	0	103.879	1	DTX	FALSE
Ssa_1471	up	0	53	9661	1443444	1	0	0	10.773	1	XXX	FALSE
Ssa_1615	up	0	11	9661	1443486	1	0	0	59.5704	1	XXX	FALSE
Ssa_1216	up	0	7	9661	1443490	1	0	0	103.879	1	XXX	FALSE
Ssa_0915	up	0	2	9661	1443495	1	0	0	802.444	1	RLG	FALSE
Ssa_1725	up	0	5	9661	1443492	1	0	0	163.157	1	XXX	FALSE
Ssa_1663	up	2	22	9659	1443475	0.0110688	13.581	1.54841	55.2056	0.138	XXX	FALSE
Ssa_1785	up	0	18	9661	1443479	1	0	0	33.9887	1	XXX	FALSE
Ssa_0742	up	0	70	9661	1443427	1	0	0	8.08739	1	DTT	FALSE
Ssa_1792	up	0	16	9661	1443481	1	0	0	38.7692	1	XXX	FALSE
Ssa_0420	up	0	5	9661	1443492	1	0	0	163.157	1	RLG	FALSE
Ssa_1651	up	0	1	9661	1443496	1	0	0	5340.97	1	XXX	FALSE
Ssa_0279	up	0	9	9661	1443488	1	0	0	75.67	1	DTX	FALSE
Ssa_1638	up	0	27	9661	1443470	1	0	0	21.8857	1	XXX	FALSE
Ssa_0286	up	0	13	9661	1443484	1	0	0	49.0494	1	RIC	FALSE
Ssa_1620	up	0	4	9661	1443493	1	0	0	226.53	1	XXX	FALSE
Ssa_0114	up	0	22	9661	1443475	1	0	0	27.2913	1	DTA	FALSE
Ssa_1936	up	0	2	9661	1443495	1	0	0	802.444	1	XXX	FALSE
Ssa_0839	up	0	10	9661	1443487	1	0	0	66.6642	1	RIJ	FALSE
Ssa_0741	up	0	25	9661	1443472	1	0	0	23.7605	1	DTT	FALSE
Ssa_1509	up	0	13	9661	1443484	1	0	0	49.0494	1	XXX	FALSE
Ssa_1941	up	0	1	9661	1443496	1	0	0	5340.97	1	XXX	FALSE
Ssa_1759	up	0	9	9661	1443488	1	0	0	75.67	1	XXX	FALSE
Ssa_1649	up	0	6	9661	1443491	1	0	0	127.31	1	XXX	FALSE
Ssa_1244	up	0	3	9661	1443494	1	0	0	359.362	1	XXX	FALSE
Ssa_1869	up	0	5	9661	1443492	1	0	0	163.157	1	XXX	FALSE
Ssa_1225	up	1	17	9660	1443480	0.113141	8.79	0.210304	56.0999	0.564	XXX	FALSE
Ssa_1911	up	0	3	9661	1443494	1	0	0	359.362	1	XXX	FALSE
Ssa_1922	up	0	2	9661	1443495	1	0	0	802.444	1	XXX	FALSE
Ssa_0900	up	0	12	9661	1443485	1	0	0	53.7841	1	RLC	FALSE
Ssa_0851	up	0	4	9661	1443493	1	0	0	226.53	1	RIN	FALSE
Ssa_0866	up	0	11	9661	1443486	1	0	0	59.5704	1	RIR	FALSE
Ssa_1910	up	0	2	9661	1443495	1	0	0	802.444	1	XXX	FALSE
Ssa_1991	up	0	36	9661	1443461	1	0	0	16.1233	1	XXX	FALSE
Ssa_0499	up	0	4	9661	1443493	1	0	0	226.53	1	RST	FALSE
Ssa_1892	up	0	1	9661	1443496	1	0	0	5340.97	1	XXX	FALSE
Ssa_1717	up	1	5	9660	1443492	0.0392326	29.894	0.631806	265.276	0.312	XXX	FALSE
Ssa_1654	up	0	12	9661	1443485	1	0	0	53.7841	1	XXX	FALSE
Ssa_1618	up	0	2	9661	1443495	1	0	0	802.444	1	XXX	FALSE
Ssa_1890	up	0	3	9661	1443494	1	0	0	359.362	1	XXX	FALSE
Ssa_1742	up	0	14	9661	1443483	1	0	0	45.0775	1	XXX	FALSE
Ssa_0177	up	0	6	9661	1443491	1	0	0	127.31	1	DTA	FALSE
Ssa_1669	up	0	2	9661	1443495	1	0	0	802.444	1	XXX	FALSE
Ssa_1693	up	0	11	9661	1443486	1	0	0	59.5704	1	XXX	FALSE
Ssa_0290	up	0	7	9661	1443490	1	0	0	103.879	1	RIC	FALSE
Ssa_1132	up	0	2	9661	1443495	1	0	0	802.444	1	XXX	FALSE
Ssa_0922	up	0	7	9661	1443490	1	0	0	103.879	1	RLG	FALSE
Ssa_1479	up	0	8	9661	1443489	1	0	0	87.5799	1	XXX	FALSE
Ssa_1609	up	0	1	9661	1443496	1	0	0	5340.97	1	XXX	FALSE
Ssa_0962	up	0	5	9661	1443492	1	0	0	163.157	1	RLG	FALSE
Ssa_1352	up	0	12	9661	1443485	1	0	0	53.7841	1	XXX	FALSE
Ssa_1743	up	0	3	9661	1443494	1	0	0	359.362	1	XXX	FALSE
Ssa_1113	up	0	5	9661	1443492	1	0	0	163.157	1	XXX	FALSE
Ssa_0766	up	0	4	9661	1443493	1	0	0	226.53	1	DTB	FALSE
Ssa_1952	up	0	1	9661	1443496	1	0	0	5340.97	1	XXX	FALSE
Ssa_1528	up	0	1	9661	1443496	1	0	0	5340.97	1	XXX	FALSE
Ssa_1337	up	0	10	9661	1443487	1	0	0	66.6642	1	XXX	FALSE
Ssa_1769	up	0	1	9661	1443496	1	0	0	5340.97	1	XXX	FALSE
Ssa_1877	up	0	1	9661	1443496	1	0	0	5340.97	1	XXX	FALSE
Ssa_1928	up	0	2	9661	1443495	1	0	0	802.444	1	XXX	FALSE
Ssa_1783	up	0	4	9661	1443493	1	0	0	226.53	1	XXX	FALSE
Ssa_1279	up	0	3	9661	1443494	1	0	0	359.362	1	XXX	FALSE
Ssa_1698	up	0	5	9661	1443492	1	0	0	163.157	1	XXX	FALSE
Ssa_0903	up	0	1	9661	1443496	1	0	0	5340.97	1	RLE	FALSE
Ssa_1224	up	0	10	9661	1443487	1	0	0	66.6642	1	XXX	FALSE
Ssa_0906	up	0	8	9661	1443489	1	0	0	87.5799	1	RLE	FALSE
Ssa_0890	up	0	7	9661	1443490	1	0	0	103.879	1	RIL	FALSE
Ssa_1947	up	0	9	9661	1443488	1	0	0	75.67	1	XXX	FALSE
Ssa_1502	up	0	9	9661	1443488	1	0	0	75.67	1	XXX	FALSE
Ssa_1927	up	0	2	9661	1443495	1	0	0	802.444	1	XXX	FALSE
Ssa_1687	up	0	4	9661	1443493	1	0	0	226.53	1	XXX	FALSE
Ssa_1752	up	0	3	9661	1443494	1	0	0	359.362	1	XXX	FALSE
Ssa_1943	up	0	2	9661	1443495	1	0	0	802.444	1	XXX	FALSE
Ssa_1755	up	0	2	9661	1443495	1	0	0	802.444	1	XXX	FALSE
Ssa_0486	up	0	3	9661	1443494	1	0	0	359.362	1	RST	FALSE
Ssa_1994	up	0	13	9661	1443484	1	0	0	49.0494	1	XXX	FALSE
Ssa_1724	up	0	9	9661	1443488	1	0	0	75.67	1	XXX	FALSE
Ssa_1670	up	0	5	9661	1443492	1	0	0	163.157	1	XXX	FALSE
Ssa_0896	up	0	9	9661	1443488	1	0	0	75.67	1	RLC	FALSE
Ssa_0496	up	0	2	9661	1443495	1	0	0	802.444	1	RST	FALSE
Ssa_1744	up	0	2	9661	1443495	1	0	0	802.444	1	XXX	FALSE
Ssa_1666	up	0	6	9661	1443491	1	0	0	127.31	1	XXX	FALSE
Ssa_1787	up	0	4	9661	1443493	1	0	0	226.53	1	XXX	FALSE
Ssa_1255	up	0	1	9661	1443496	1	0	0	5340.97	1	XXX	FALSE
Ssa_1933	up	0	1	9661	1443496	1	0	0	5340.97	1	XXX	FALSE
Ssa_1622	up	0	1	9661	1443496	1	0	0	5340.97	1	XXX	FALSE
Ssa_1112	up	0	1	9661	1443496	1	0	0	5340.97	1	XXX	FALSE
Ssa_1924	up	0	1	9661	1443496	1	0	0	5340.97	1	XXX	FALSE
Ssa_1240	up	0	4	9661	1443493	1	0	0	226.53	1	XXX	FALSE
Ssa_1738	up	0	20	9661	1443477	1	0	0	30.278	1	XXX	FALSE
Ssa_1946	up	0	1	9661	1443496	1	0	0	5340.97	1	XXX	FALSE
Ssa_0721	up	0	2	9661	1443495	1	0	0	802.444	1	DTA	FALSE
Ssa_0287	up	0	1	9661	1443496	1	0	0	5340.97	1	RIC	FALSE
Ssa_1767	up	0	5	9661	1443492	1	0	0	163.157	1	XXX	FALSE
Ssa_0048	up	0	1	9661	1443496	1	0	0	5340.97	1	DTX	FALSE
Ssa_1370	up	0	3	9661	1443494	1	0	0	359.362	1	XXX	FALSE
Ssa_0778	up	0	1	9661	1443496	1	0	0	5340.97	1	DMM	FALSE
Ssa_0800	up	0	5	9661	1443492	1	0	0	163.157	1	RIC	FALSE
Ssa_0931	up	0	1	9661	1443496	1	0	0	5340.97	1	RLG	FALSE
Ssa_1672	up	0	1	9661	1443496	1	0	0	5340.97	1	XXX	FALSE
Ssa_1958	up	0	1	9661	1443496	1	0	0	5340.97	1	XXX	FALSE
Ssa_1318	up	0	5	9661	1443492	1	0	0	163.157	1	XXX	FALSE
Ssa_0289	up	0	1	9661	1443496	1	0	0	5340.97	1	RIC	FALSE
Ssa_1473	up	0	1	9661	1443496	1	0	0	5340.97	1	XXX	FALSE
Ssa_0767	up	0	1	9661	1443496	1	0	0	5340.97	1	DTB	FALSE
Ssa_1810	up	0	1	9661	1443496	1	0	0	5340.97	1	XXX	FALSE
Ssa_0208	down	89	18230	6674	1428165	0.662	1.045	0.8374	1.28827	1	DTT	FALSE
Ssa_1448	down	12	2207	6751	1444188	0.53208	1.163	0.599777	2.03716	1	XXX	FALSE
Ssa_0381	down	125	27728	6638	1418667	0.722117	0.963	0.800355	1.15047	1	RIJ	FALSE
Ssa_0840	down	30	6660	6733	1439735	0.928231	0.963	0.648842	1.37768	1	RIJ	FALSE
Ssa_0293	down	67	16117	6696	1430278	0.383161	0.888	0.686963	1.12981	1	RIC	FALSE
Ssa_0099	down	11	2229	6752	1444166	0.756413	1.055	0.525881	1.8935	1	DTA	FALSE
Ssa_0276	down	3	1412	6760	1444983	0.234904	0.454	0.0935199	1.33055	1	DTT	FALSE
Ssa_1472	down	0	141	6763	1446254	1	0	0	5.66963	1	XXX	FALSE
Ssa_0070	down	80	9904	6683	1436491	5.84483e-06	1.736	1.37367	2.16626	0.001	DTG	TRUE
Ssa_0016	down	7	791	6756	1445604	0.106656	1.894	0.758551	3.92153	1	DTX	FALSE
Ssa_0365	down	168	26692	6595	1419703	0.00020106	1.355	1.15499	1.58006	0.015	RIR	TRUE
Ssa_0972	down	127	8650	6636	1437745	1.38597e-27	3.181	2.64407	3.79668	0	XXX	TRUE
Ssa_0958	down	16	3669	6747	1442726	0.903435	0.932	0.532127	1.51748	1	RLG	FALSE
Ssa_0360	down	49	9959	6714	1436436	0.7121	1.053	0.777423	1.3944	1	RIR	FALSE
Ssa_0361	down	63	13368	6700	1433027	0.949158	1.008	0.773217	1.2922	1	RIR	FALSE
Ssa_0126	down	9	884	6754	1445511	0.0415284	2.179	0.992621	4.15724	0.744	DTA	FALSE
Ssa_0522	down	4	1698	6759	1444697	0.209242	0.504	0.136995	1.29215	1	RLX	FALSE
Ssa_0333	down	34	9339	6729	1437056	0.169567	0.778	0.537659	1.08834	1	RIJ	FALSE
Ssa_0363	down	131	24647	6632	1421748	0.144174	1.139	0.950629	1.3552	1	RIR	FALSE
Ssa_1626	down	9	631	6754	1445764	0.00353308	3.053	1.38904	5.83588	0.168	XXX	FALSE
Ssa_0498	down	21	4444	6742	1441951	0.912156	1.011	0.624566	1.54805	1	RST	FALSE
Ssa_0897	down	9	1283	6754	1445112	0.214433	1.501	0.684441	2.85988	1	RLC	FALSE
Ssa_0789	down	95	42652	6668	1403743	1.35099e-16	0.469	0.378734	0.57425	0	DTT	FALSE
Ssa_0271	down	237	58583	6526	1387812	0.0220902	0.86	0.752342	0.979774	0.538	DTT	FALSE
Ssa_0029	down	4	790	6759	1445605	0.790723	1.083	0.294245	2.78522	1	DTX	FALSE
Ssa_0201	down	20	5486	6743	1440909	0.319851	0.779	0.475165	1.20533	1	DTT	FALSE
Ssa_0266	down	33	10189	6730	1436206	0.0339766	0.691	0.47508	0.972285	0.643	DTT	FALSE
Ssa_0202	down	33	9025	6730	1437370	0.186979	0.781	0.536783	1.09864	1	DTT	FALSE
Ssa_0858	down	53	10983	6710	1435412	0.778851	1.032	0.77197	1.35294	1	RIR	FALSE
Ssa_0144	down	12	1898	6751	1444497	0.307622	1.353	0.697411	2.37022	1	DTA	FALSE
Ssa_0342	down	4	1642	6759	1444753	0.271362	0.521	0.141667	1.33639	1	RIN	FALSE
Ssa_0332	down	91	21034	6672	1425361	0.507693	0.924	0.74277	1.13709	1	RIJ	FALSE
Ssa_0658	down	0	501	6763	1445894	0.183563	0	0	1.58045	1	DTX	FALSE
Ssa_0458	down	5	1628	6758	1444767	0.46456	0.657	0.212831	1.53618	1	RLG	FALSE
Ssa_0217	down	80	16522	6683	1429873	0.730686	1.036	0.819965	1.292	1	DTT	FALSE
Ssa_0017	down	0	277	6763	1446118	0.644221	0	0	2.86737	1	DTX	FALSE
Ssa_1418	down	10	2128	6753	1444267	0.873966	1.005	0.481022	1.85307	1	XXX	FALSE
Ssa_0371	down	34	15894	6729	1430501	2.26935e-07	0.455	0.31453	0.636407	0	RIJ	FALSE
Ssa_0243	down	12	3779	6751	1442616	0.229671	0.679	0.350128	1.18751	1	DTT	FALSE
Ssa_0376	down	13	5018	6750	1441377	0.0286	0.553	0.294206	0.947499	0.592	RIR	FALSE
Ssa_1373	down	42	5518	6721	1440877	0.00289503	1.632	1.17357	2.21096	0.15	XXX	FALSE
Ssa_1541	down	1	420	6762	1445975	1	0.509	0.0128608	2.85319	1	XXX	FALSE
Ssa_0204	down	155	27690	6608	1418705	0.0261628	1.202	1.01772	1.41006	0.579	DTT	FALSE
Ssa_1181	down	35	6332	6728	1440063	0.309352	1.183	0.822587	1.64886	1	XXX	FALSE
Ssa_0368	down	5	2118	6758	1444277	0.147903	0.505	0.163586	1.17982	1	RIR	FALSE
Ssa_0430	down	2	1366	6761	1445029	0.106187	0.313	0.0378526	1.13301	1	RLG	FALSE
Ssa_0750	down	45	8935	6718	1437460	0.586007	1.078	0.784697	1.44486	1	DTT	FALSE
Ssa_0358	down	55	12930	6708	1433465	0.517498	0.909	0.683638	1.1854	1	RIR	FALSE
Ssa_0362	down	72	13146	6691	1433249	0.177292	1.173	0.916238	1.48051	1	RIR	FALSE
Ssa_0394	down	6	1643	6757	1444752	0.716068	0.781	0.286029	1.7041	1	RIL	FALSE
Ssa_0451	down	96	22530	6667	1423865	0.402325	0.91	0.735738	1.11356	1	RLG	FALSE
Ssa_0759	down	6	4932	6757	1441463	5.5772e-05	0.26	0.095191	0.565577	0.004	DTT	FALSE
Ssa_1379	down	32	2264	6731	1444131	9.36292e-08	3.032	2.06746	4.29745	0	XXX	TRUE
Ssa_0180	down	17	3082	6746	1443313	0.506327	1.18	0.686157	1.89406	1	DTA	FALSE
Ssa_0863	down	32	7368	6731	1439027	0.79683	0.929	0.634101	1.31328	1	RIR	FALSE
Ssa_0684	down	4	799	6759	1445596	0.792418	1.071	0.290939	2.75349	1	DTX	FALSE
Ssa_0374	down	43	9367	6720	1437028	1	0.982	0.709268	1.32482	1	RIR	FALSE
Ssa_0100	down	20	2549	6743	1443846	0.027924	1.68	1.02381	2.60224	0.592	DTA	FALSE
Ssa_1227	down	1	182	6762	1446213	0.574174	1.175	0.0295868	6.63176	1	XXX	FALSE
Ssa_0364	down	17	4201	6746	1442194	0.649994	0.865	0.503177	1.38787	1	RIR	FALSE
Ssa_1137	down	45	2439	6718	1443956	5.34727e-14	3.966	2.88191	5.32802	0	XXX	TRUE
Ssa_0050	down	17	5876	6746	1440519	0.0435755	0.618	0.359421	0.990749	0.766	DTX	FALSE
Ssa_0804	down	41	8430	6722	1437965	0.748941	1.04	0.745374	1.4142	1	RIC	FALSE
Ssa_0292	down	4	1258	6759	1445137	0.67495	0.68	0.184899	1.74579	1	RIC	FALSE
Ssa_0867	down	93	19402	6670	1426993	0.79102	1.026	0.826133	1.25891	1	RIR	FALSE
Ssa_0346	down	0	209	6763	1446186	1	0	0	3.80881	1	RIN	FALSE
Ssa_1821	down	1	212	6762	1446183	0.629792	1.009	0.0254189	5.68368	1	XXX	FALSE
Ssa_1419	down	6	1934	6757	1444461	0.402566	0.663	0.242994	1.44691	1	XXX	FALSE
Ssa_0038	down	6	930	6757	1445465	0.46208	1.38	0.505009	3.01699	1	DTX	FALSE
Ssa_0190	down	14	3906	6749	1442489	0.408738	0.766	0.418197	1.28782	1	DTT	FALSE
Ssa_0805	down	39	11499	6724	1434896	0.0459316	0.724	0.513924	0.991081	0.792	RIC	FALSE
Ssa_1348	down	1	150	6762	1446245	0.50561	1.426	0.0358582	8.06886	1	XXX	FALSE
Ssa_1425	down	2	214	6761	1446181	0.266182	1.999	0.240493	7.31286	1	XXX	FALSE
Ssa_0629	down	4	1196	6759	1445199	0.670951	0.715	0.194472	1.83657	1	DTX	FALSE
Ssa_0334	down	8	2058	6755	1444337	0.745964	0.831	0.358224	1.64172	1	RIJ	FALSE
Ssa_0220	down	13	2334	6750	1444061	0.5406	1.192	0.633162	2.04314	1	DTT	FALSE
Ssa_1495	down	0	259	6763	1446136	0.6382	0	0	3.06791	1	XXX	FALSE
Ssa_0120	down	3	318	6760	1446077	0.189321	2.018	0.413874	5.95389	1	DTA	FALSE
Ssa_0808	down	5	549	6758	1445846	0.119026	1.949	0.629967	4.5768	1	RIC	FALSE
Ssa_1315	down	0	53	6763	1446342	1	0	0	15.4172	1	XXX	FALSE
Ssa_1187	down	2	758	6761	1445637	0.594663	0.564	0.0681835	2.04581	1	XXX	FALSE
Ssa_0298	down	27	8026	6736	1438369	0.099561	0.718	0.472734	1.04691	1	RIC	FALSE
Ssa_1397	down	0	1005	6763	1445390	0.0177329	0	0	0.786123	0.5	XXX	FALSE
Ssa_0439	down	10	1956	6753	1444439	0.738294	1.094	0.523311	2.01664	1	RLG	FALSE
Ssa_0747	down	36	7846	6727	1438549	1	0.981	0.686094	1.361	1	DTT	FALSE
Ssa_1451	down	5	517	6758	1445878	0.0990852	2.069	0.668777	4.86232	1	XXX	FALSE
Ssa_1382	down	7	1173	6756	1445222	0.514308	1.277	0.511921	2.63985	1	XXX	FALSE
Ssa_0560	down	4	552	6759	1445843	0.33579	1.55	0.420735	3.99366	1	RLX	FALSE
Ssa_0532	down	1	538	6762	1445857	0.528759	0.397	0.0100451	2.22449	1	RLX	FALSE
Ssa_0495	down	29	3982	6734	1442413	0.0260411	1.56	1.04256	2.24603	0.579	RST	FALSE
Ssa_0756	down	11	7808	6752	1438587	1.57992e-06	0.3	0.149692	0.537719	0	DTT	FALSE
Ssa_1162	down	0	451	6763	1445944	0.282681	0	0	1.75641	1	XXX	FALSE
Ssa_0380	down	19	2548	6744	1443847	0.05633	1.596	0.958946	2.50039	0.855	RIR	FALSE
Ssa_0452	down	32	8858	6731	1437537	0.158836	0.772	0.526977	1.09106	1	RLG	FALSE
Ssa_0784	down	69	18624	6694	1427771	0.0513803	0.79	0.613808	1.00195	0.829	DTT	FALSE
Ssa_0643	down	0	312	6763	1446083	0.412147	0	0	2.54379	1	DTX	FALSE
Ssa_0247	down	11	1679	6752	1444716	0.277294	1.402	0.698094	2.5165	1	DTT	FALSE
Ssa_0803	down	77	16209	6686	1430186	0.862072	1.016	0.800453	1.27258	1	RIC	FALSE
Ssa_0802	down	35	9969	6728	1436426	0.0899538	0.75	0.521351	1.04426	1	RIC	FALSE
Ssa_0681	down	3	1436	6760	1444959	0.176185	0.447	0.091957	1.30817	1	DTX	FALSE
Ssa_0249	down	0	147	6763	1446248	1	0	0	5.43494	1	DTT	FALSE
Ssa_1286	down	0	170	6763	1446225	1	0	0	4.69216	1	XXX	FALSE
Ssa_0375	down	3	632	6760	1445763	0.772432	1.015	0.208748	2.98152	1	RIR	FALSE
Ssa_0389	down	1	517	6762	1445878	0.738709	0.414	0.0104523	2.31535	1	RIL	FALSE
Ssa_0547	down	4	527	6759	1445868	0.319971	1.624	0.440602	4.1838	1	RLX	FALSE
Ssa_0324	down	0	112	6763	1446283	1	0	0	7.16279	1	RIL	FALSE
Ssa_0269	down	3	812	6760	1445583	1	0.79	0.162531	2.31809	1	DTT	FALSE
Ssa_0571	down	17	1768	6746	1444627	0.00745131	2.059	1.19605	3.3091	0.298	RLX	FALSE
Ssa_0454	down	13	2641	6750	1443754	0.775036	1.053	0.55956	1.80481	1	RLG	FALSE
Ssa_0758	down	14	8934	6749	1437461	1.1093e-06	0.334	0.182284	0.560663	0	DTT	FALSE
Ssa_1107	down	4	1466	6759	1444929	0.437229	0.583	0.158669	1.49735	1	XXX	FALSE
Ssa_0411	down	17	4370	6746	1442025	0.57703	0.832	0.483684	1.33397	1	RLC	FALSE
Ssa_0944	down	2	1033	6761	1445362	0.254627	0.414	0.0500525	1.49952	1	RLG	FALSE
Ssa_0657	down	1	496	6762	1445899	0.734729	0.431	0.010894	2.41387	1	DTX	FALSE
Ssa_0028	down	5	1029	6758	1445366	0.818005	1.039	0.336596	2.43425	1	DTX	FALSE
Ssa_1531	down	0	35	6763	1446360	1	0	0	23.7776	1	XXX	FALSE
Ssa_1422	down	1	402	6762	1445993	1	0.532	0.0134352	2.98197	1	XXX	FALSE
Ssa_1965	down	0	394	6763	1446001	0.272809	0	0	2.01185	1	XXX	FALSE
Ssa_0085	down	0	203	6763	1446192	1	0	0	3.92242	1	DTA	FALSE
Ssa_1143	down	4	812	6759	1445583	0.794979	1.054	0.28629	2.70921	1	XXX	FALSE
Ssa_0754	down	25	7335	6738	1439060	0.121688	0.728	0.470417	1.0764	1	DTT	FALSE
Ssa_0527	down	10	1747	6753	1444648	0.480019	1.225	0.585901	2.25877	1	RLX	FALSE
Ssa_0447	down	8	2134	6755	1444261	0.63498	0.802	0.34547	1.58304	1	RLG	FALSE
Ssa_0598	down	6	1224	6757	1445171	0.832379	1.048	0.383836	2.28975	1	RLX	FALSE
Ssa_0627	down	2	284	6761	1446111	0.384418	1.506	0.181475	5.49388	1	RLX	FALSE
Ssa_0450	down	29	5843	6734	1440552	0.700609	1.062	0.709861	1.52795	1	RLG	FALSE
Ssa_0743	down	4	1261	6759	1445134	0.67525	0.678	0.184459	1.74162	1	DTT	FALSE
Ssa_0757	down	25	14506	6738	1431889	4.37069e-09	0.366	0.236769	0.541346	0	DTT	FALSE
Ssa_1988	down	2	351	6761	1446044	0.681951	1.219	0.146993	4.4365	1	XXX	FALSE
Ssa_0041	down	4	611	6759	1445784	0.378579	1.4	0.380225	3.60545	1	DTX	FALSE
Ssa_0409	down	2	216	6761	1446179	0.269614	1.981	0.23828	7.24441	1	RLB	FALSE
Ssa_1203	down	3	569	6760	1445826	0.752299	1.128	0.231786	3.31338	1	XXX	FALSE
Ssa_1214	down	0	96	6763	1446299	1	0	0	8.38056	1	XXX	FALSE
Ssa_0591	down	4	919	6759	1445476	1	0.931	0.25299	2.39249	1	RLX	FALSE
Ssa_0224	down	0	388	6763	1446007	0.434411	0	0	2.04315	1	DTT	FALSE
Ssa_0617	down	1	1903	6762	1444492	0.0033529	0.112	0.00284378	0.626373	0.164	RLX	FALSE
Ssa_0294	down	43	11480	6720	1434915	0.168544	0.8	0.577927	1.07919	1	RIC	FALSE
Ssa_0515	down	3	869	6760	1445526	0.804209	0.738	0.151931	2.1656	1	RLX	FALSE
Ssa_0740	down	7	1820	6756	1444575	0.731857	0.822	0.33003	1.69889	1	DTT	FALSE
Ssa_0170	down	4	563	6759	1445832	0.343238	1.52	0.412535	3.9148	1	DTA	FALSE
Ssa_0584	down	3	1275	6760	1445120	0.302017	0.503	0.103566	1.47395	1	RLX	FALSE
Ssa_0297	down	6	2473	6757	1443922	0.135952	0.518	0.190013	1.13071	1	RIC	FALSE
Ssa_0481	down	7	1310	6756	1445085	0.681877	1.143	0.458445	2.3629	1	RST	FALSE
Ssa_0482	down	0	1167	6763	1445228	0.00822516	0	0	0.676746	0.316	RST	FALSE
Ssa_0845	down	16	3722	6747	1442673	0.903817	0.919	0.524541	1.4958	1	RIN	FALSE
Ssa_0135	down	8	1515	6755	1444880	0.703302	1.129	0.486544	2.2326	1	DTA	FALSE
Ssa_0937	down	2	610	6761	1445785	1	0.701	0.0846985	2.54464	1	RLG	FALSE
Ssa_0553	down	0	328	6763	1446067	0.414025	0	0	2.41897	1	RLX	FALSE
Ssa_1446	down	20	2590	6743	1443805	0.030099	1.653	1.00759	2.561	0.598	XXX	FALSE
Ssa_0076	down	0	701	6763	1445694	0.0860422	0	0	1.12815	1	DTA	FALSE
Ssa_0445	down	11	2795	6752	1443600	0.677107	0.841	0.419356	1.50887	1	RLG	FALSE
Ssa_1246	down	6	1017	6757	1445378	0.487636	1.262	0.461857	2.75781	1	XXX	FALSE
Ssa_0163	down	1	525	6762	1445870	0.52844	0.407	0.0102934	2.2799	1	DTA	FALSE
Ssa_0623	down	3	1148	6760	1445247	0.509036	0.559	0.114996	1.63755	1	RLX	FALSE
Ssa_0489	down	3	422	6760	1445973	0.455015	1.521	0.312276	4.47639	1	RST	FALSE
Ssa_0886	down	5	1269	6758	1445126	1	0.843	0.273007	1.97234	1	RIL	FALSE
Ssa_0536	down	6	567	6757	1445828	0.0536363	2.264	0.827161	4.96132	0.842	RLX	FALSE
Ssa_1375	down	26	4186	6737	1442209	0.140533	1.33	0.866914	1.95281	1	XXX	FALSE
Ssa_1395	down	9	1700	6754	1444695	0.719327	1.132	0.516696	2.15603	1	XXX	FALSE
Ssa_0429	down	6	2977	6757	1443418	0.0300673	0.431	0.157813	0.938708	0.598	RLE	FALSE
Ssa_0383	down	6	332	6757	1446063	0.00543956	3.868	1.4087	8.51423	0.245	RIT	FALSE
Ssa_0062	down	25	1539	6738	1444856	1.94085e-07	3.483	2.24544	5.16643	0	DTC	TRUE
Ssa_0393	down	1	224	6762	1446171	1	0.955	0.0240629	5.37546	1	RIL	FALSE
Ssa_0961	down	0	803	6763	1445592	0.0601815	0	0	0.984468	0.868	RLG	FALSE
Ssa_1790	down	6	2995	6757	1443400	0.030276	0.428	0.156862	0.933049	0.598	XXX	FALSE
Ssa_0413	down	3	771	6760	1445624	1	0.832	0.171169	2.44185	1	RLC	FALSE
Ssa_0296	down	19	4807	6744	1441588	0.525514	0.845	0.507907	1.32192	1	RIC	FALSE
Ssa_1386	down	8	1685	6755	1444710	0.858078	1.015	0.437487	2.00655	1	XXX	FALSE
Ssa_1182	down	2	672	6761	1445723	0.776091	0.636	0.0768964	2.30876	1	XXX	FALSE
Ssa_0572	down	1	647	6762	1445748	0.383013	0.33	0.00835533	1.84832	1	RLX	FALSE
Ssa_0464	down	7	380	6756	1446015	0.00249777	3.943	1.57386	8.2084	0.133	RLG	FALSE
Ssa_1274	down	6	1437	6757	1444958	1	0.893	0.327011	1.94923	1	XXX	FALSE
Ssa_0955	down	1	182	6762	1446213	0.574174	1.175	0.0295868	6.63176	1	RLG	FALSE
Ssa_1381	down	8	2357	6755	1444038	0.449299	0.726	0.312736	1.43286	1	XXX	FALSE
Ssa_0556	down	2	370	6761	1446025	0.693263	1.156	0.139464	4.20741	1	RLX	FALSE
Ssa_0551	down	2	542	6761	1445853	1	0.789	0.0953031	2.86548	1	RLX	FALSE
Ssa_0094	down	9	2051	6754	1444344	1	0.938	0.428294	1.78589	1	DTA	FALSE
Ssa_0191	down	1	278	6762	1446117	1	0.769	0.0194046	4.3232	1	DTT	FALSE
Ssa_1496	down	1	173	6762	1446222	0.555913	1.236	0.0311175	6.98208	1	XXX	FALSE
Ssa_1151	down	9	1222	6754	1445173	0.200161	1.576	0.718558	3.00337	1	XXX	FALSE
Ssa_1852	down	27	6207	6736	1440188	0.779896	0.93	0.611931	1.35573	1	XXX	FALSE
Ssa_1457	down	0	176	6763	1446219	1	0	0	4.53053	1	XXX	FALSE
Ssa_1402	down	2	352	6761	1446043	0.682534	1.215	0.146577	4.4238	1	XXX	FALSE
Ssa_1801	down	0	218	6763	1446177	0.631286	0	0	3.65021	1	XXX	FALSE
Ssa_0209	down	115	20944	6648	1425451	0.0920169	1.177	0.969967	1.41643	1	DTT	FALSE
Ssa_1465	down	4	2890	6759	1443505	0.00562898	0.296	0.0804777	0.758023	0.248	XXX	FALSE
Ssa_1335	down	40	1762	6723	1444633	2.17655e-15	4.877	3.46955	6.67725	0	XXX	TRUE
Ssa_0259	down	4	625	6759	1445770	0.545951	1.369	0.37173	3.52428	1	DTB	FALSE
Ssa_1409	down	2	576	6761	1445819	1	0.743	0.0896886	2.6956	1	XXX	FALSE
Ssa_0178	down	0	283	6763	1446112	0.646548	0	0	2.80619	1	DTA	FALSE
Ssa_0663	down	2	1060	6761	1445335	0.255758	0.403	0.0487782	1.4612	1	DTX	FALSE
Ssa_0081	down	5	578	6758	1445817	0.20445	1.851	0.59846	4.34598	1	DTA	FALSE
Ssa_0942	down	3	1303	6760	1445092	0.304	0.492	0.101342	1.44218	1	RLG	FALSE
Ssa_0722	down	8	950	6755	1445445	0.0941087	1.802	0.775384	3.56713	1	DTA	FALSE
Ssa_0941	down	7	1142	6756	1445253	0.387559	1.311	0.525796	2.71195	1	RLG	FALSE
Ssa_0337	down	9	1238	6754	1445157	0.203368	1.555	0.709285	2.96438	1	RIJ	FALSE
Ssa_0676	down	4	942	6759	1445453	1	0.908	0.246844	2.33386	1	DTX	FALSE
Ssa_0664	down	13	1312	6750	1445083	0.0127141	2.121	1.12584	3.64249	0.399	DTX	FALSE
Ssa_1376	down	11	2091	6752	1444304	0.629331	1.125	0.560585	2.01897	1	XXX	FALSE
Ssa_0072	down	1	616	6762	1445779	0.54234	0.347	0.00877514	1.94171	1	DTH	FALSE
Ssa_0711	down	0	237	6763	1446158	0.63315	0	0	3.35526	1	DTA	FALSE
Ssa_1850	down	2	466	6761	1445929	1	0.918	0.110807	3.33535	1	XXX	FALSE
Ssa_1413	down	2	202	6761	1446193	0.245595	2.118	0.254687	7.75468	1	XXX	FALSE
Ssa_0010	down	0	176	6763	1446219	1	0	0	4.53053	1	DYC	FALSE
Ssa_0459	down	20	2777	6743	1443618	0.0678818	1.542	0.93972	2.38792	0.926	RLG	FALSE
Ssa_0139	down	9	1856	6754	1444539	0.863827	1.037	0.473271	1.97425	1	DTA	FALSE
Ssa_0659	down	10	505	6753	1445890	0.000188816	4.24	2.01985	7.86621	0.014	DTX	TRUE
Ssa_0188	down	1	259	6762	1446136	1	0.826	0.020823	4.64349	1	DTI	FALSE
Ssa_0359	down	55	8584	6708	1437811	0.0258703	1.373	1.0326	1.79147	0.579	RIR	FALSE
Ssa_0613	down	15	2519	6748	1443876	0.307183	1.274	0.711652	2.10709	1	RLX	FALSE
Ssa_0479	down	9	1418	6754	1444977	0.326843	1.358	0.619359	2.58663	1	RLG	FALSE
Ssa_0824	down	1	134	6762	1446261	0.467294	1.596	0.0401089	9.04928	1	RIL	FALSE
Ssa_1399	down	17	4161	6746	1442234	0.731674	0.873	0.50802	1.40127	1	XXX	FALSE
Ssa_0938	down	5	1339	6758	1445056	0.839797	0.798	0.258775	1.86891	1	RLG	FALSE
Ssa_0468	down	2	406	6761	1445989	0.715592	1.054	0.127122	3.83217	1	RLG	FALSE
Ssa_0225	down	9	619	6754	1445776	0.00312494	3.112	1.41584	5.9511	0.157	DTT	FALSE
Ssa_0519	down	0	301	6763	1446094	0.654345	0	0	2.63734	1	RLX	FALSE
Ssa_1461	down	4	849	6759	1445546	0.802905	1.008	0.273832	2.59064	1	XXX	FALSE
Ssa_0042	down	63	5394	6700	1441001	2.03165e-10	2.512	1.92522	3.22335	0	DTX	TRUE
Ssa_0444	down	17	2055	6746	1444340	0.0329656	1.771	1.02913	2.84501	0.63	RLG	FALSE
Ssa_0267	down	12	4729	6751	1441666	0.0315117	0.542	0.279654	0.948079	0.616	DTT	FALSE
Ssa_0272	down	12	1854	6751	1444541	0.2329	1.385	0.713973	2.42683	1	DTT	FALSE
Ssa_0053	down	1	183	6762	1446212	0.576156	1.169	0.029426	6.5949	1	DTX	FALSE
Ssa_0912	down	13	6255	6750	1440140	0.0014422	0.443	0.235854	0.759347	0.082	RLE	FALSE
Ssa_0833	down	0	62	6763	1446333	1	0	0	13.1093	1	RIL	FALSE
Ssa_0701	down	1	355	6762	1446040	1	0.602	0.0152092	3.37911	1	DTX	FALSE
Ssa_0257	down	1	534	6762	1445861	0.528595	0.4	0.0101202	2.24126	1	DTT	FALSE
Ssa_0435	down	6	820	6757	1445575	0.293636	1.565	0.572594	3.42343	1	RLG	FALSE
Ssa_0093	down	6	2313	6757	1444082	0.168179	0.554	0.203166	1.20912	1	DTA	FALSE
Ssa_0585	down	4	500	6759	1445895	0.304877	1.711	0.464342	4.41115	1	RLX	FALSE
Ssa_1575	down	0	361	6763	1446034	0.422912	0	0	2.19667	1	XXX	FALSE
Ssa_1185	down	7	1404	6756	1444991	0.842991	1.066	0.427781	2.20417	1	XXX	FALSE
Ssa_1283	down	0	361	6763	1446034	0.422912	0	0	2.19667	1	XXX	FALSE
Ssa_1288	down	2	58	6761	1446337	0.0320766	7.377	0.872485	27.8876	0.62	XXX	FALSE
Ssa_0216	down	14	4211	6749	1442184	0.255453	0.71	0.38785	1.1942	1	DTT	FALSE
Ssa_1186	down	1	1127	6762	1445268	0.0738549	0.19	0.00479988	1.05915	0.959	XXX	FALSE
Ssa_1290	down	0	59	6763	1446336	1	0	0	13.7979	1	XXX	FALSE
Ssa_0469	down	2	331	6761	1446064	0.670628	1.292	0.155848	4.70699	1	RLG	FALSE
Ssa_0446	down	5	1088	6758	1445307	1	0.983	0.318367	2.30179	1	RLG	FALSE
[truncated: 1,520 more rows]
